# Supplementary material for: Global, regional, and national estimates of pneumonia morbidity and mortality in children younger than 5 years between 2000 and 2015: a systematic analysis
Source: PubMed Central journal article supplement (PMC6293057; doi:10.1016/s2214-109x(18)30408-x), 2018-11-26
Supplement: mmc1.pdf [file mmc1.pdf]

# THE LANCET

## Global Health

### Supplementary appendix

This appendix formed part of the original submission and has been peer reviewed. We post it as supplied by the authors.

Supplement to: McAllister DA, Liu L, Shi T, et al. Global, regional, and national estimates of pneumonia morbidity and mortality in children younger than 5 years between 2000 and 2015: a systematic analysis. *Lancet Glob Health* 2018; published online Nov 26. [http://dx.doi.org/10.1016/S2214-109X\(18\)30408-X](http://dx.doi.org/10.1016/S2214-109X(18)30408-X).

Supplementary material for “Global, regional and national estimates of trends in child pneumonia morbidity and mortality for 2000–2015: a systematic analysis”

## CLINICAL PNEUMONIA

### SEARCH TERMS (Medline)

| # | Searches                                                                                                                                                                                                                                                              |
|---|-----------------------------------------------------------------------------------------------------------------------------------------------------------------------------------------------------------------------------------------------------------------------|
| 1 | clinical pneumonia.mp. [mp=title, abstract, original title, name of substance word, subject heading word, keyword heading word, protocol supplementary concept word, rare disease supplementary concept word, unique identifier]                                      |
| 2 | severe pneumonia.mp. [mp=title, abstract, original title, name of substance word, subject heading word, keyword heading word, protocol supplementary concept word, rare disease supplementary concept word, unique identifier]                                        |
| 3 | exp Respiratory Tract Infections/ep [Epidemiology]                                                                                                                                                                                                                    |
| 4 | pneumonia/ or bronchopneumonia/ or pleuropneumonia/ or pneumonia, bacterial/ or chlamydial pneumonia/ or pneumonia, mycoplasma/ or pneumonia, pneumococcal/ or pneumonia, rickettsial/ or pneumonia, staphylococcal/ or pneumonia, pneumocystis/ or pneumonia, viral/ |
| 5 | ("acute lower respiratory infection" or "alri").mp. [mp=title, abstract, original title, name of substance word, subject heading word, keyword heading word, protocol supplementary concept word, rare disease supplementary concept word, unique identifier]         |
| 6 | morbidity/ or incidence/ or prevalence/ or mortality/ or epidemiological monitoring/ or geographic mapping/                                                                                                                                                           |
| 7 | 1 or 2 or 3 or 4 or 5                                                                                                                                                                                                                                                 |
| 8 | 6 and 7                                                                                                                                                                                                                                                               |
| 9 | limit 8 to (yr="1980 -Current" and "all child (0 to 18 years)")                                                                                                                                                                                                       |

SEARCH TERMS (EMBASE & Global Health)

| # | Searches                                                                                                                                     |
|---|----------------------------------------------------------------------------------------------------------------------------------------------|
| 1 | clinical pneumonia.mp. [mp=abstract, title, original title, broad terms, heading words, identifiers, cabicodes]                              |
| 2 | severe pneumonia.mp. [mp=abstract, title, original title, broad terms, heading words, identifiers, cabicodes]                                |
| 3 | [exp Respiratory Tract Infections/ep [Epidemiology]]                                                                                         |
| 4 | ("acute lower respiratory infection" or "alri").mp. [mp=abstract, title, original title, broad terms, heading words, identifiers, cabicodes] |
| 5 | exp pneumonia/                                                                                                                               |
| 6 | 1 or 2 or 3 or 4 or 5                                                                                                                        |
| 7 | (incidence or morbidity).mp. [mp=abstract, title, original title, broad terms, heading words, identifiers, cabicodes]                        |
| 8 | 6 and 7                                                                                                                                      |
| 9 | limit 8 to (yr="1980 -Current" and (child <unspecified age> or preschool child <1 to 6 years> or school child <7 to 12 years>))              |

## HOSPITALISED PNEUMONIA

### MEDLINE

1. exp Pneumonia/
2. exp Respiratory Tract Infections/ or acute lower respiratory infections.mp.
3. acute respiratory infection\$.mp.
4. lower respiratory infection\$.mp.
5. exp Bronchiolitis/ or Bronchiolitis, Viral/
6. Pneumococcal Vaccines/ or Haemophilus Vaccines/
7. \*Zinc/
8. Vitamin A/
9. exp Incidence/
10. disease burden.mp.
11. exp Morbidity/
12. 1 or 2 or 3 or 4 or 5
13. 6 or 7 or 8
14. 1 and 13
15. 9 or 10 or 11
16. 12 or 14
17. 15 and 16
18. limit 17 to (yr="1 April 2012 -Current" and ("all infant (birth to 23 months)" or "preschool child (2 to 5 years)") and humans)

### EMBASE

1. exp respiratory tract infection/ or exp lower respiratory tract infection/ or acute lower respiratory tract infection\$.mp. or exp pneumonia/
2. lower respiratory infection\$.mp.
3. acute lower respiratory infection\$.mp.
4. exp BRONCHIOLITIS/ or VIRAL BRONCHIOLITIS/
5. exp Pneumococcus vaccine/
6. exp Haemophilus influenzae type b vaccine/
7. \*ZINC/
8. \*alpha tocopherol/ or Vitamin A.mp.
9. exp INCIDENCE/
10. disease burden.mp.
11. exp MORBIDITY/
12. 1 or 2 or 3 or 4
13. 5 or 6 or 7 or 8

14. 1 and 13
15. 9 or 10 or 11
16. 12 or 14
17. 15 and 16
18. limit 17 to (human and yr="1990 -Current" and (infant or preschool child <1 to 6 years>))

## **GLOBAL HEALTH**

1. (pneumonia or lower respiratory tract infections).sh.
2. acute respiratory infection\$.mp.
3. exp bronchiolitis/
4. vaccines.sh.
5. (retinol or zinc).sh.
6. exp incidence/
7. disease burden.mp. or morbidity.sh.
8. exp children/
9. 1 or 2 or 3
10. 4 or 5
11. 9 and 10
12. 6 or 7
13. 9 or 11
14. 12 and 13
15. 8 and 14
16. limit 15 to yr="1 April 2012 -Current"

## **CINAHL**

TI Pneumonia

OR

TI Community Acquired Pneumonia

OR

TI Pneumonia Virus\$

OR

TI Pneumonia bacteria\$

OR

TI bronchiolitis

OR

TI Acute Lower Respiratory Infection.

AND

TI Children

Limiters: 2012-2016; infants: 1 to 23 months & Child, Preschool 2-5 years

## Methods for estimating incidence and episodes of clinical pneumonia in young children at country level

- Step 1 We conducted a systematic literature review to identify the risk factors for pneumonia in children aged 0-4 years. We selected risk factors which in meta-analyses had strong statistically significant associations with pneumonia. These were:
- Malnutrition (weight for age <-2SD)– odds ratio (OR) 4.5 (2.1-9.5)
  - Low birth weight (<2500g) – OR 3.6 (0.8-16.3)
  - Non-exclusive breastfeeding (4 months) – OR 2.7 (1.7-4.4)
  - Indoor air pollution – OR 1.6 (1.1-2.3)
  - HIV – OR 6.51 (5.86-7.24)
  - Crowding (more than 5 persons per household) – OR 1.9 (1.5-2.5)
  - Incomplete immunisation (No measles immunisation at 12 months of age) – OR 1.8 (1.3-2.5)
- Step 2 We obtained data on the prevalence of all risk factors other than HIV from nationally representative household surveys with large sample sizes - the demographic and health surveys (DHS). DHS surveys are generally carried out every 2 to 5 years and provide data on demography and health indicators. The data for China were obtained from the Chinese National Bureau of Statistics. The HIV data were obtained from the United Nations programme on HIV/AIDS (UNAIDS) estimates for 2013 ([http://www.unaids.org/en/media/unaids/contentassets/documents/epidemiology/2013/gr2013/20131118\\_Methodology.pdf](http://www.unaids.org/en/media/unaids/contentassets/documents/epidemiology/2013/gr2013/20131118_Methodology.pdf)). We ensured that the definitions of risk factors were the same in the studies estimating the risk ratios as in the surveys that measured prevalence of exposure to these risk factors.
- Specifically, we defined each risk factor using one or more DHS variables. Then, using individual patient data from the standard DHS survey (excluding special surveys) for each country at the survey version closest to 2000 and 2015 respectively, we calculated the proportion of participants with each combination of risk factors.
- Step 3 We categorised the developing countries into different subgroups based on the six WHO regions and child and adult mortality strata: A, very low child and very low adult mortality; B, low child and low adult mortality; C, low child and high adult mortality; D, high child and high adult mortality; E, high child and very high adult mortality. Where available, we decided to use the latest data for the prevalence of the seven risk factors. If the prevalence data were not available for any risk factor in a particular country, we imputed the median prevalence for the subgroup to which the country belonged.
- Step 4 The overall incidence (of clinical pneumonia in community) and hospitalisation rate (for physician diagnosed pneumonia) in developing countries were obtained from the Poisson regression models as described in the main methods section.



10,000 samples for each prediction were obtained. For the proportion of cases which were severe (i.e. with lower chest wall indrawing), the estimate from random effects meta-analysis (using Stata 11.1) was represented as a beta distribution, from which 10,000 samples were obtained using R. The incidence of severe pneumonia was calculated as the incidence of clinical pneumonia in the community times the proportion with severe pneumonia.

The overall incidence (of clinical and hospitalised pneumonia respectively) in a population is the sum of each stratum specific rate, weighted by the proportion in each stratum where there are  $j$  mutually exclusive strata:-

$$Total\ rate = \frac{\sum x_j}{\sum n_j} = \sum_j \left( \frac{x_j}{n_j} \cdot \frac{n_0}{x_0} \cdot \frac{x_0}{n_0} \cdot \frac{n_j}{\sum n_j} \right)$$

where  $x$  is the number of cases in a stratum,  $n$  is the total population in a stratum and where  $j=0$  indicates the stratum which has no exposures (i.e. the unexposed) and  $j=1$  to  $j=127$  indicate the strata for each unique combination of risk factors. This equation can be re-written as:-

$$Total\ rate = \frac{x_0}{n_0} \times \sum_j \left( \frac{x_j}{n_j} \cdot \frac{n_0}{x_0} \cdot \frac{n_j}{\sum n_j} \right)$$

where  $\frac{x_0}{n_0}$  is the rate in the unexposed,  $\frac{x_j}{n_j} \cdot \frac{n_0}{x_0}$  is the rate ratio, and  $\frac{n_j}{\sum n_j}$  is the proportion in each stratum.

Therefore, using the regional estimates (for developing countries) of the total rate, the combined rate ratio for each stratum, and the proportion in each stratum we can calculate the incidence in unexposed people for the region (all developing countries). If we then assume that the rate in the unexposed is consistent across the region we can then calculate the incidence rate for each country:-

$$Country\ specific\ rate = \frac{\sum x_j^c}{\sum n_j^c} = \frac{\sum x_j^r}{\sum n_j^r} \cdot \frac{\sum_j \left( \frac{x_j}{n_j} \cdot \frac{n_0}{x_0} \cdot \frac{n_j^r}{\sum n_j^r} \right)}{\sum_j \left( \frac{x_j}{n_j} \cdot \frac{n_0}{x_0} \cdot \frac{n_j^c}{\sum n_j^c} \right)}$$

where  $c$  indicates a country specific value and  $r$  indicates a regional value.

## Step 5

### Assumptions:

- As with attributable fraction calculations, we assume that the pooled risk ratios obtained from a range of case-control/cohort studies in the developing region were applicable across each developing country. As described in Step 6 we added additional uncertainty to our estimates to relax this assumption somewhat.
- As in our previous analysis for HIV and pneumonia[1] we assumed that there was an n-way interaction between each risk factor (1.25 fold reduction) such that rate ratios combined sub-multiplicatively (e.g. for the group with malnutrition and low birth weight,  $RR_{\text{malnutrition}} = 4.5$ , and  $RR_{\text{low birth weight}} = 3.6$ ,  $RR_{\text{both}} = 4.5 \times 3.6 / 1.25 = 12.96$  rather than  $4.5 \times 3.6 = 16.2$ ). None of the primary studies included in the meta-analysis reported interaction/heterogeneity of effect measure estimates on a multiplicative scale. However, although we noted that the majority of studies did not report testing for interaction (presumably because of an actual or perceived lack of statistical power) it seemed unlikely to us that all risks combined fully multiplicatively. Therefore, we added a weak interaction term to shrink the combined rate ratios towards the null. This would have the effect of causing the country specific estimates to be attenuated towards the overall estimate for the developing region.
- In order to calculate the proportion of the population in each country within each of the j strata we first aggregated the survey data to obtain a marginal (overall) estimate for each risk factor, then assumed independence to estimate the proportion of individuals with each combination of risk factors (i.e. the proportion in each of the j strata). This assumption was made so that the uncertainty around the proportion for each combination of risk factors could be obtained by sampling from 7 beta distributions (with shape parameters determined by the number of participants in the survey with and without each of the 7 risk factors), then multiplying together each of the 7 sampling distributions. We could instead have used the actual number of participants with each combination of risk factors, and sampled instead from a Dirichlet distribution (a multivariate extension of the beta distribution). However, our chosen approach had a number of advantages. Firstly, it allowed us to use data from more than one source (as maternal HIV is not well recorded in the DHS surveys). Secondly, data processing was more straightforward. Thirdly, it meant that we could make the data used in the analyses publicly available, which would not have been possible had we used the actual joint proportions, which are potentially disclosive. We examined the extent to which our assumption of independence over or underestimated each joint proportion across 102 DHS surveys (See Table below). For the purpose of this tabulation alone, self-reported maternal sexually transmitted infection was used as a surrogate for HIV infection.

- In 97% of the 127 strata (in 102 DHS surveys) where people had one or more of the seven risk factors, the estimated proportion was within 5% of the true proportion. The independence assumption meant that we tended to overestimate the true proportion of participants with no risk factors or few risk factors, as expected given that these risk factors are in fact correlated. This means that the model will tend to underestimate differences between countries on average, although it may overestimate or underestimate the incidence rate depending on the actual correlation of risk factors in particular countries.
- Finally we assumed that the rate among the unexposed (i.e. the risk in the absence of these seven risk factors) came from the same distribution for all countries. This is the same as assuming that there was no residual confounding.

Step 6 Using a simulation based approach, we performed the calculation described in Step 4 to estimate the country specific rates along with uncertainty estimates as uncertainty ranges (UR).

This was done by performing this calculation for each of the 10,000 samples from the distributions representing the incidence rates, disease severity proportion, odds ratios and risk factor proportions (methods used to obtain each of these were obtained as described above) within R. Full analysis code and data are available from the authors on request.

Step 7 In a similar manner to equation 3 within step 4, we calculated the incidence of pneumonia in HIV-uninfected children by summing those strata where children were HIV negative regardless of the presence/absence of other risk factors. Similarly, we calculated the incidence of pneumonia in HIV-infected children.

Step 8 Having obtained estimates of the total rate and rate in HIV-uninfected children in each country, we used the standard formula for attributable fraction.<sup>1</sup>

$$\text{Attributable fraction} = \frac{I_e - I_0}{I_e}$$

$$\text{or, equivalently, attributable fraction} = \frac{RR - 1}{RR}$$

where  $I_e$  is the incidence in HIV-infected and  $I_0$  is the incidence in HIV-uninfected in each country; and RR is the risk ratio for pneumonia in HIV-infected (compared to -uninfected). We then applied the attributable fraction to the rate among the HIV-infected (and the UR) in order to obtain the rate attributable to HIV with the UR. As we had already incorporated uncertainty in the HIV risk factor estimates in calculating the total country rates, we did not add additional uncertainty at this stage.

Supplementary table 1: Impact of obtaining joint proportions from marginal proportions, using assumption of independence

| Risk factors | Independence assumption leads to overestimation (> 5%) | Independence assumption correct within 5% of true value | Independence assumption leads to underestimation (> 5%) |
|--------------|--------------------------------------------------------|---------------------------------------------------------|---------------------------------------------------------|
| 0            | 77( 75.5)                                              | 14( 13.7)                                               | 11( 10.8)                                               |
| 1            | 238( 33.3)                                             | 466( 65.3)                                              | 10( 1.4)                                                |
| 2            | 258( 12.0)                                             | 1879( 87.7)                                             | 5( 0.2)                                                 |
| 3            | 97( 2.7)                                               | 3469( 97.2)                                             | 4( 0.1)                                                 |
| 4            | 1( 0.0)                                                | 3566( 99.9)                                             | 3( 0.1)                                                 |
| 5            | 0( 0.0)                                                | 2142( 100.0)                                            | 0( 0.0)                                                 |
| 6            | 0( 0.0)                                                | 714( 100.0)                                             | 0( 0.0)                                                 |
| 7            | 0( 0.0)                                                | 102( 100.0)                                             | 0( 0.0)                                                 |

Cells contain the number and (%) of strata in which proportions are overestimated, underestimated and correctly estimated, for 102 DHS surveys.

Supplementary table 2: Details of studies reporting incidence of clinical pneumonia in children younger than 5 years

| S.No | Location (study period)                                             | Region | Duration of study (months) | Age group under study (months) | Case definition    |                  | Status of Hib vaccine implementation at time of study | Status of PCV implementation at time of study (indicate valency of the vaccine) | Assessor               | Surveillance intervals | Site of diagnosis | Denominator (cohort size) | Incidence 0-4 years (episodes/child-year) | Proportion of cases with severe pneumonia |
|------|---------------------------------------------------------------------|--------|----------------------------|--------------------------------|--------------------|------------------|-------------------------------------------------------|---------------------------------------------------------------------------------|------------------------|------------------------|-------------------|---------------------------|-------------------------------------------|-------------------------------------------|
|      |                                                                     |        |                            |                                | Clinical pneumonia | Severe pneumonia |                                                       |                                                                                 |                        |                        |                   |                           |                                           |                                           |
| 1    | Ibadan, Nigeria; urban (Oct 1984 - Oct 1987) <sup>2</sup>           | AFR    | 36                         | 0-59                           | IC, W-, CR+        |                  | No                                                    | No                                                                              | FW (and Physician)     | Weekly                 | Clinic and home   | 610                       | 1.38                                      |                                           |
| 2    | Maragua, Kenya; rural (Feb 1985 - Jan 1988) <sup>3</sup>            | Africa | 36                         | 0-59                           | IC, W-, CR+        |                  | No                                                    | No                                                                              | FW (and Physician)     | Weekly                 | Clinic and home   | 470                       | 0.16                                      |                                           |
| 3    | Basse, The Gambia; rural (Mar 1987 - Mar 1988) <sup>4</sup>         | Africa | 12                         | 0-59                           | IB, W-, CR-        |                  | No                                                    | No                                                                              | TFW (and Physician)    | Weekly                 | Home and hospital | 491                       | 0.45                                      |                                           |
| 4    | Accra, Ghana; rural (Jan 1987 - Dec 1989) <sup>5</sup>              | Africa | 36                         | 0-59                           | IB, W-, CR-        |                  | No                                                    | No                                                                              | Nurses (and Physician) | Weekly                 | Clinic and home   | 1350                      | 0.06                                      |                                           |
| 5    | Ilorin, Nigeria; suburban (Jul 1988 - Jun 1989) <sup>6</sup>        | Africa | 12                         | 0-59                           | IA, W+, CR-        | IA, W+, CR+      | No                                                    | No                                                                              | TFW                    | 3x/week                | Home              | 481                       | 1.65                                      | 0.11                                      |
| 6    | Ibadan, Nigeria; urban and rural (Jun 1999 - May 2001) <sup>7</sup> | Africa | 24                         | 0-59                           | IB, W-, CR-        |                  | No                                                    | No                                                                              | Nurses (TFW)           | Weekly                 | Home and hospital | 1579                      | 0.27                                      |                                           |

| S.No | Location (study period)                                                                | Region   | Duration of study (months) | Age group under study (months) | Case definition    |                  | Status of Hib vaccine implementation at time of study | Status of PCV implementation at time of study (indicate valency of the vaccine) | Assessor               | Surveillance intervals | Site of diagnosis   | Denominator (cohort size) | Incidence 0-4 years (episodes/child-year) | Proportion of cases with severe pneumonia |
|------|----------------------------------------------------------------------------------------|----------|----------------------------|--------------------------------|--------------------|------------------|-------------------------------------------------------|---------------------------------------------------------------------------------|------------------------|------------------------|---------------------|---------------------------|-------------------------------------------|-------------------------------------------|
|      |                                                                                        |          |                            |                                | Clinical pneumonia | Severe pneumonia |                                                       |                                                                                 |                        |                        |                     |                           |                                           |                                           |
| 7    | Upper and Central River Division, The Gambia; rural (Aug 2000 - Apr 2004) <sup>8</sup> | Africa   | 45                         | 3-29                           | IB, W-, CR-        | II               | No                                                    | No                                                                              | Nurses (and Physician) | Weekly                 | Hospital            | 8151                      | 0.2                                       | 0.07                                      |
| 8    | Paarl, South Africa; periurban (May 2012 - May 2014) <sup>9</sup>                      | Africa   | 24                         | 0-11                           | IA, W-, CR-        | IA, W-, CR+      | Yes                                                   | Yes                                                                             | TFW (and Physician)    | Not known              | Clinic and hospital | 697                       | 0.22                                      | 0.23                                      |
| 9    | Monte-video, Uruguay; urban (May 1985 - Dec 1987) <sup>10</sup>                        | Americas | 32                         | 0-35                           | II                 |                  | No                                                    | No                                                                              | Pediatrician           | 10 days                | Home                | 166                       | 2.26                                      |                                           |
| 10   | Guatemala city, Guatemala; suburban (Jan 1985 - Dec 1986) <sup>11</sup>                | Americas | 24                         | 0-59                           | IC, W-, CR+        |                  | No                                                    | No                                                                              | TFW (and Physician)    | Fortnightly            | Clinic              | 521                       | 0.31                                      |                                           |
| 11   | Cali, Colombia; urban (Jan 1987 - Dec 1989) <sup>12</sup>                              | Americas | 36                         | 0-17                           | IC, W-, CR+        |                  | No                                                    | No                                                                              | TFW                    | Weekly                 | Clinic              | 340                       | 1.26                                      |                                           |
| 12   | San Marcos, Guatemala; rural (Oct 2002 - Dec 2004) <sup>13</sup>                       | Americas | 15                         | 0-59                           | II                 | II               | No                                                    | No                                                                              | Physician              | Weekly                 | Home                | 253                       | 0.28                                      | 0.34                                      |

| S.No | Location (study period)                                          | Region                | Duration of study (months) | Age group under study (months) | Case definition    |                  | Status of Hib vaccine implementation at time of study | Status of PCV implementation at time of study (indicate valency of the vaccine) | Assessor            | Surveillance intervals | Site of diagnosis | Denominator (cohort size) | Incidence 0-4 years (episodes/child-year) | Proportion of cases with severe pneumonia |
|------|------------------------------------------------------------------|-----------------------|----------------------------|--------------------------------|--------------------|------------------|-------------------------------------------------------|---------------------------------------------------------------------------------|---------------------|------------------------|-------------------|---------------------------|-------------------------------------------|-------------------------------------------|
|      |                                                                  |                       |                            |                                | Clinical pneumonia | Severe pneumonia |                                                       |                                                                                 |                     |                        |                   |                           |                                           |                                           |
| 13   | Canto Grande, Peru; suburban (Jul 1987 - Oct 1989) <sup>14</sup> | Americas              | 27                         | 0-41                           | II                 |                  | No                                                    | No                                                                              | Physician (and TFW) | 2x/week                | Home and clinic   | 1500                      | 0.26                                      |                                           |
| 14   | Ghizer, Pakistan; rural (Nov 2001 - Dec 2002) <sup>15</sup>      | Eastern Mediterranean | 14                         | 2-35                           | IC, W-, CR-        | IC, W-, CR+      | No                                                    | No                                                                              | TFW                 | Fortnightly            | Home and hospital | 5204                      | 0.23                                      | 0.27                                      |
| 15   | Karachi, Pakistan; urban (Apr 2002 - Apr 2003) <sup>16</sup>     | Eastern Mediterranean | 12                         | 0-59                           | IA, W-, CR-        |                  | No                                                    | No                                                                              | TFW                 | Weekly                 | Home              | 1634                      | 0.9                                       |                                           |
| 16   | Haryana, India; rural (Jan 1982 - Sep 1983) <sup>17</sup>        | South East Asia       | 21                         | 0-23                           | IB, W+, CR-        |                  | No                                                    | No                                                                              | TFW                 | Weekly                 | Home              | 347                       | 0.24                                      |                                           |
| 17   | Kathmandu, Nepal; rural (Feb 1984 - Jan 1987) <sup>18</sup>      | South East Asia       | 36                         | 0-59                           | IB, W+, CR+        |                  | No                                                    | No                                                                              | TFW                 | Fortnightly            | Home              | 1019                      | 0.22                                      |                                           |
| 18   | Bangkok, Thailand; urban (Jan 1986 - Dec 1987) <sup>19</sup>     | South East Asia       | 24                         | 0-59                           | IC, W-, CR+        |                  | No                                                    | No                                                                              | TFW (and Physician) | 2x/week                | Home              | 674                       | 0.07                                      |                                           |
| 19   | Haryana, India; rural (Jan 1986 - Dec 1986) <sup>20</sup>        | South East Asia       | 12                         | 0-59                           | IB, W-, CR+        |                  | No                                                    | No                                                                              | TFW                 | Fortnightly            | Home              | 5078                      | 0.54                                      |                                           |

| S.No | Location (study period)                                                   | Region          | Duration of study (months) | Age group under study (months) | Case definition    |                  | Status of Hib vaccine implementation at time of study | Status of PCV implementation at time of study (indicate valency of the vaccine) | Assessor                    | Surveillance intervals | Site of diagnosis | Denominator (cohort size) | Incidence 0-4 years (episodes/child-year) | Proportion of cases with severe pneumonia |
|------|---------------------------------------------------------------------------|-----------------|----------------------------|--------------------------------|--------------------|------------------|-------------------------------------------------------|---------------------------------------------------------------------------------|-----------------------------|------------------------|-------------------|---------------------------|-------------------------------------------|-------------------------------------------|
|      |                                                                           |                 |                            |                                | Clinical pneumonia | Severe pneumonia |                                                       |                                                                                 |                             |                        |                   |                           |                                           |                                           |
| 20   | Yumla, Nepal; rural (Jun 1986 - Jun 1989) <sup>21</sup>                   | South East Asia | 36                         | 0-59                           | IA, W+, CR-        |                  | No                                                    | No                                                                              | TFW                         | Fortnightly            | Home              | 13404                     | 0.7                                       |                                           |
| 21   | Matlab, Bangladesh; rural (May 1988 - Apr 1989) <sup>22</sup>             | South East Asia | 12                         | 0-59                           | IB, W-, CR-        |                  | No                                                    | No                                                                              | TFW                         | 2x/week                | Home              | 696                       | 0.23                                      |                                           |
| 22   | Wardha, India; rural (Sep 1990 - Aug 1991) <sup>23</sup>                  | South East Asia | 12                         | 0-59                           | IA, W+, CR-        |                  | No                                                    | No                                                                              | Not reported (probably TFW) | Fortnightly            | Home              | 384                       | 0.08                                      |                                           |
| 23   | Mirzapur, Bangladesh; rural (Oct 1993 - Sep 1996) <sup>24</sup>           | South East Asia | 36                         | 0-23                           | IB, W+, CR-        | IB, W+, CR+      | No                                                    | No                                                                              | TFW (and pediatrician)      | 2x/week                | Home and hospital | 288                       | 0.38                                      | 0.26                                      |
| 24   | Bandung, Indonesia; suburban and rural (Feb 1999 - Jan 2001) <sup>7</sup> | South East Asia | 24                         | 0-59                           | IC, W+, CR-        | IC, W+, CR+      | No                                                    | No                                                                              | TFW                         | Weekly                 | Home and clinic   | 1420                      | 0.19                                      | 0.12                                      |



| S.No | Location (study period)                                                   | Region          | Duration of study (months) | Age group under study (months) | Case definition    |                  | Status of Hib vaccine implementation at time of study | Status of PCV implementation at time of study (indicate valency of the vaccine) | Assessor            | Surveillance intervals | Site of diagnosis       | Denominator (cohort size) | Incidence 0-4 years (episodes/child-year) | Proportion of cases with severe pneumonia |
|------|---------------------------------------------------------------------------|-----------------|----------------------------|--------------------------------|--------------------|------------------|-------------------------------------------------------|---------------------------------------------------------------------------------|---------------------|------------------------|-------------------------|---------------------------|-------------------------------------------|-------------------------------------------|
|      |                                                                           |                 |                            |                                | Clinical pneumonia | Severe pneumonia |                                                       |                                                                                 |                     |                        |                         |                           |                                           |                                           |
| 25   | Ballabgarh, Haryana, India; rural (Oct 2001 - Mar 2005) <sup>25</sup>     | South East Asia | 42                         | 0-35                           | IC, W-, CR-        | IC, W-, CR+      | No                                                    | No                                                                              | TFW (and Physician) | Weekly                 | Home and hospital       | 281                       | 0.24                                      | 0.17                                      |
| 26   | Dhaka, Bangladesh; urban (Apr 2004 - Dec 2007) <sup>26</sup>              | South East Asia | 45                         | 0-59                           | IC, W-, CR-        | IC, W+, CR+      | No                                                    | No                                                                              | TFW (and Physician) | Weekly                 | Home and hospital       | 12062                     | 0.47                                      | 0.070                                     |
| 27   | Mirzapur, Bangladesh; rural (Jul 2004 - Jun 2007) <sup>27</sup>           | South East Asia | 36                         | 0-59                           | IC, W+, CR-        | IC, W+, CR+      | No                                                    | No                                                                              | TFW (and Physician) | Weekly                 | Home and hospital       | 22378                     | 0.31                                      | 0.53                                      |
| 28   | Delhi, India; periurban (Jan 2011 - Jan 2012) <sup>28</sup>               | South East Asia | 12                         | 0-59                           | IA, W-, CR-        | IA, W-, CR+      | No                                                    | No                                                                              | TFW (and Physician) | Fortnightly            | Home and hospital       | 106                       | 0.37                                      | 0.06                                      |
| 29   | Tari & Asaro, Papua New Guinea; rural (Jan 1979 - Jan 1983) <sup>29</sup> | Western Pacific | 48                         | 0-59                           | IB, W-, CR-        | IB, W-, CR+      | No                                                    | No                                                                              | TFW (and Physician) | Fortnightly            | Home and hospital       | 1595                      | 0.41                                      | 0.7                                       |
| 30   | Changping county, China; semirural (Jun 1981 - Jun 1983) <sup>30</sup>    | Western Pacific | 24                         | 0-143                          | II                 |                  | No                                                    | No                                                                              | Physician           | Weekly                 | Home and primary school | 526                       | 0.07                                      |                                           |

| S.No | Location (study period)                                                           | Region          | Duration of study (months) | Age group under study (months) | Case definition    |                  | Status of Hib vaccine implementation at time of study | Status of PCV implementation at time of study (indicate valency of the vaccine) | Assessor              | Surveillance intervals | Site of diagnosis         | Denominator (cohort size) | Incidence 0-4 years (episodes/child-year) | Proportion of cases with severe pneumonia |
|------|-----------------------------------------------------------------------------------|-----------------|----------------------------|--------------------------------|--------------------|------------------|-------------------------------------------------------|---------------------------------------------------------------------------------|-----------------------|------------------------|---------------------------|---------------------------|-------------------------------------------|-------------------------------------------|
|      |                                                                                   |                 |                            |                                | Clinical pneumonia | Severe pneumonia |                                                       |                                                                                 |                       |                        |                           |                           |                                           |                                           |
| 31   | Albang Manila, Phillipines; urban (Apr 1985 - Mar 1987) <sup>31</sup>             | Western Pacific | 24                         | 0-59                           | IC, W-, CR+        |                  | No                                                    | No                                                                              | Nurse (and Physician) | Weekly                 | Home and clinic           | 1978                      | 0.53                                      |                                           |
| 32   | Asaro valley, Papua New Guinea; rural (Jan 1985 - Dec 1987) <sup>32</sup>         | Western Pacific | 36                         | 0-59                           | IB, W+, CR-        |                  | No                                                    | No                                                                              | Lay reporters         | 2x/week                | Home                      | 156                       | 1.32                                      |                                           |
| 33   | Zhejiang Province, China; rural (Apr 1990 - Mar 1991) <sup>33</sup>               | Western Pacific | 12                         | 0-59                           | IA, W-, CR-        |                  | No                                                    | No                                                                              | TFW (and Physician)   | Fortnightly            | Home and clinic           | 1215                      | 0.10                                      |                                           |
| 34   | Zhejiang Province, China; rural (Apr 1990 - Mar 1991) <sup>34</sup>               | Western Pacific | 12                         | 0-59                           | IA, W-, CR-        |                  | No                                                    | No                                                                              | TFW (and Physician)   | Monthly                | Home and clinic           | 7472                      | 0.13                                      |                                           |
| 35   | Rudong County, Jiangsu Province, China; rural (Feb 1991 - Jan 1993) <sup>35</sup> | Western Pacific | 12                         | 0-59                           | IA, W-, CR-        |                  | No                                                    | No                                                                              | TFW (and Physician)   | Not known              | Home, clinic and hospital | 10541                     | 0.28                                      |                                           |
| 36   | Liyang City, China; rural (1991 - 1994) <sup>36</sup>                             | Western Pacific | 36                         | 0-59                           | IA, W-, CR-        |                  | No                                                    | No                                                                              | TFW (and Physician)   | Not known              | Clinic and hospital       | 20867                     | 0.12                                      |                                           |

| S.No | Location (study period)                                                                    | Region          | Duration of study (months) | Age group under study (months) | Case definition    |                  | Status of Hib vaccine implementation at time of study | Status of PCV implementation at time of study (indicate valency of the vaccine) | Assessor            | Surveillance intervals | Site of diagnosis   | Denominator (cohort size) | Incidence 0-4 years (episodes/child-year) | Proportion of cases with severe pneumonia |
|------|--------------------------------------------------------------------------------------------|-----------------|----------------------------|--------------------------------|--------------------|------------------|-------------------------------------------------------|---------------------------------------------------------------------------------|---------------------|------------------------|---------------------|---------------------------|-------------------------------------------|-------------------------------------------|
|      |                                                                                            |                 |                            |                                | Clinical pneumonia | Severe pneumonia |                                                       |                                                                                 |                     |                        |                     |                           |                                           |                                           |
| 37   | Changshou County, China; rural (Feb 1992 - Jan 1993) <sup>37</sup>                         | Western Pacific | 12                         | 0-59                           | IA, W-, CR-        |                  | No                                                    | No                                                                              | TFW                 | Not known              | Clinic              | 2246                      | 0.19                                      |                                           |
| 38   | Huanan and Keshan County, Heilongjiang Province; rural (Jan 1993 - Dec 1993) <sup>38</sup> | Western Pacific | 12                         | 0-59                           | IA, W-, CR-        |                  | No                                                    | No                                                                              | TFW                 | Not known              | Clinic              | 5812                      | 0.16                                      |                                           |
| 39   | Guangzhou, China; urban (Oct 1993 - Sep 1998) <sup>39</sup>                                | Western Pacific | 60                         | 0-59                           | IC, III            |                  | No                                                    | No                                                                              | TFW                 | Not known              | Clinic              | 120970                    | 0.32                                      |                                           |
| 40   | Liyang City, China; rural (Feb 1994 - Jan 1995) <sup>40</sup>                              | Western Pacific | 12                         | 0-59                           | IA, W-, CR-        |                  | No                                                    | No                                                                              | TFW (and Physician) | Not known              | Clinic and hospital | 11729                     | 0.12                                      |                                           |
| 41   | Henan Province, China; rural and urban (Jan 1994 - Dec 1994) <sup>41</sup>                 | Western Pacific | 12                         | 0-59                           | IA, W-, CR-        |                  | No                                                    | No                                                                              | TFW (and Physician) | Not known              | Clinic and hospital | 7917                      | 0.11                                      |                                           |
| 42   | Licheng District, Quanzhou City, China; rural (Oct 1994 - Sept 1995) <sup>42</sup>         | Western Pacific | 12                         | 0-59                           | IA, W-, CR-        |                  | No                                                    | No                                                                              | TFW (and Physician) | Not known              | Clinic and hospital | 4665                      | 0.13                                      |                                           |

| S.No | Location (study period)                                                    | Region          | Duration of study (months) | Age group under study (months) | Case definition    |                  | Status of Hib vaccine implementation at time of study | Status of PCV implementation at time of study (indicate valency of the vaccine) | Assessor            | Surveillance intervals | Site of diagnosis   | Denominator (cohort size) | Incidence 0-4 years (episodes/child-year) | Proportion of cases with severe pneumonia |
|------|----------------------------------------------------------------------------|-----------------|----------------------------|--------------------------------|--------------------|------------------|-------------------------------------------------------|---------------------------------------------------------------------------------|---------------------|------------------------|---------------------|---------------------------|-------------------------------------------|-------------------------------------------|
|      |                                                                            |                 |                            |                                | Clinical pneumonia | Severe pneumonia |                                                       |                                                                                 |                     |                        |                     |                           |                                           |                                           |
| 43   | Huaning County, Yunnan Province, China (Jan 1995 - Dec 1997) <sup>43</sup> | Western Pacific | 24                         | 0-59                           | IA, W-, CR-        |                  | No                                                    | No                                                                              | TFW (and Physician) | Not known              | Clinic and hospital | 6966                      | 0.66                                      |                                           |
| 44   | Hubei Province, China; rural (Jul 1996- Jun 1999) <sup>44</sup>            | Western Pacific | 36                         | 0-59                           | IA, W-, CR-        |                  | No                                                    | No                                                                              | TFW                 | Not known              | Clinic              | 75337                     | 0.64                                      |                                           |
| 45   | Jinan City, China; urban (Jan 1995- Dec 2001) <sup>45</sup>                | Western Pacific | 84                         | 0-59                           | II                 |                  | No                                                    | No                                                                              | TFW                 | Not known              | Clinic              | 321249                    | 0.22                                      |                                           |
| 46   | Haryana, India; rural (Aug 2012- Aug 2013) <sup>46</sup>                   | South East Asia | 12                         | 0-119                          | IB, W-, CR-        |                  | No                                                    | No                                                                              | TFW                 | Weekly                 | Home and hospital   | 1782                      | 0.37                                      |                                           |

Supplementary table 3: Incidence of clinical pneumonia in young children in developing countries (2000-2015)

| <b>Year</b> | <b>Incidence rate per 1000 children per year</b> | <b>Number of episodes of clinical pneumonia (millions)</b> |
|-------------|--------------------------------------------------|------------------------------------------------------------|
| <b>2000</b> | 329 (201-537)                                    | 178 (110-289)                                              |
| <b>2005</b> | 292 (179-477)                                    | 162 (100-263)                                              |
| <b>2010</b> | 259 (159-424)                                    | 150 (92-244)                                               |
| <b>2015</b> | 231 (141-377)                                    | 138 (86-226)                                               |

Supplementary table 4: Incidence and episodes of clinical pneumonia in children younger than 5 years in 2000

| Country                         | Incidence of clinical pneumonia (per 1000 children per year) in children younger than 5 years | Episodes of clinical pneumonia in children younger than 5 years | Incidence of clinical pneumonia in HIV infected children (per 1000 children per year) | Episode of clinical pneumonia in HIV infected children | Episodes of clinical pneumonia attributable to HIV |
|---------------------------------|-----------------------------------------------------------------------------------------------|-----------------------------------------------------------------|---------------------------------------------------------------------------------------|--------------------------------------------------------|----------------------------------------------------|
| <b>Afghanistan</b>              | 598 (325-1122)                                                                                | 2551075 (1383857-4783262)                                       | 3106 (1662-5850)                                                                      | 13240 (7084-24940)                                     | 10703 (5687-20272)                                 |
| <b>Algeria</b>                  | 282 (170-472)                                                                                 | 877260 (528817-1467580)                                         | 1467 (876-2493)                                                                       | 4590 (2732-8033)                                       | 3706 (2191-6511)                                   |
| <b>Angola</b>                   | 327 (198-538)                                                                                 | 892424 (540837-1468768)                                         | 1684 (1011-2810)                                                                      | 14149 (5974-30437)                                     | 11427 (4808-24620)                                 |
| <b>Antigua and Barbuda</b>      | 191 (106-338)                                                                                 | 1479 (824-2621)                                                 | 1000 (551-1796)                                                                       | 8 (4-14)                                               | 6 (3-12)                                           |
| <b>Argentina</b>                | 191 (106-337)                                                                                 | 657436 (365513-1162540)                                         | 999 (551-1789)                                                                        | 3481 (1914-6511)                                       | 2819 (1542-5293)                                   |
| <b>Bahamas</b>                  | 191 (106-339)                                                                                 | 5377 (2986-9541)                                                | 998 (551-1795)                                                                        | 43 (19-108)                                            | 35 (16-88)                                         |
| <b>Bahrain</b>                  | 302 (160-590)                                                                                 | 21901 (11599-42773)                                             | 1579 (824-3114)                                                                       | 115 (60-232)                                           | 93 (48-188)                                        |
| <b>Bangladesh</b>               | 361 (218-601)                                                                                 | 6041515 (3655788-10059442)                                      | 1875 (1116-3153)                                                                      | 31396 (18674-52847)                                    | 25369 (14992-42892)                                |
| <b>Barbados</b>                 | 191 (106-338)                                                                                 | 3523 (1955-6236)                                                | 999 (551-1795)                                                                        | 19 (10-35)                                             | 15 (8-29)                                          |
| <b>Belize</b>                   | 266 (153-459)                                                                                 | 9138 (5273-15782)                                               | 1375 (786-2403)                                                                       | 103 (46-217)                                           | 83 (37-176)                                        |
| <b>Benin</b>                    | 520 (301-892)                                                                                 | 647464 (374548-1111086)                                         | 2675 (1530-4633)                                                                      | 10717 (4464-23843)                                     | 8660 (3597-19332)                                  |
| <b>Bhutan</b>                   | 216 (121-387)                                                                                 | 16262 (9112-29089)                                              | 1134 (633-2045)                                                                       | 85 (48-154)                                            | 69 (38-126)                                        |
| <b>Bolivia</b>                  | 277 (154-495)                                                                                 | 337941 (187863-603328)                                          | 1444 (794-2591)                                                                       | 1845 (999-3751)                                        | 1491 (803-3051)                                    |
| <b>Botswana</b>                 | 437 (263-729)                                                                                 | 99258 (59597-165451)                                            | 1936 (1150-3252)                                                                      | 18501 (10799-31635)                                    | 14960 (8709-25745)                                 |
| <b>Brazil</b>                   | 244 (130-448)                                                                                 | 4256325 (2271522-7820093)                                       | 1269 (670-2367)                                                                       | 22998 (11948-47240)                                    | 18586 (9602-38436)                                 |
| <b>Burkina Faso</b>             | 349 (205-590)                                                                                 | 757451 (446236-1280901)                                         | 1762 (1030-3001)                                                                      | 28310 (14915-52310)                                    | 22857 (12029-42352)                                |
| <b>Burundi</b>                  | 380 (228-632)                                                                                 | 455332 (273225-756144)                                          | 1937 (1146-3256)                                                                      | 12826 (6746-24414)                                     | 10367 (5414-19818)                                 |
| <b>Cambodia</b>                 | 462 (248-801)                                                                                 | 686893 (368951-1191233)                                         | 2386 (1278-4189)                                                                      | 6749 (2988-14503)                                      | 5451 (2405-11793)                                  |
| <b>Cameroon</b>                 | 241 (144-407)                                                                                 | 665451 (397146-1121198)                                         | 1197 (706-2041)                                                                       | 42650 (20601-85216)                                    | 34477 (16573-69189)                                |
| <b>Cape Verde</b>               | 325 (197-537)                                                                                 | 20141 (12234-33279)                                             | 1684 (1013-2823)                                                                      | 138 (72-358)                                           | 112 (58-291)                                       |
| <b>Central African Republic</b> | 534 (306-923)                                                                                 | 315982 (180965-546095)                                          | 2589 (1467-4510)                                                                      | 26995 (14341-50351)                                    | 21806 (11505-40696)                                |

| Country                      | Incidence of clinical pneumonia (per 1000 children per year) in children younger than 5 years | Episodes of clinical pneumonia in children younger than 5 years | Incidence of clinical pneumonia in HIV infected children (per 1000 children per year) | Episode of clinical pneumonia in HIV infected children | Episodes of clinical pneumonia attributable to HIV |
|------------------------------|-----------------------------------------------------------------------------------------------|-----------------------------------------------------------------|---------------------------------------------------------------------------------------|--------------------------------------------------------|----------------------------------------------------|
| Chad                         | 528 (279-947)                                                                                 | 889337 (469358-1594283)                                         | 2673 (1401-4856)                                                                      | 30044 (13177-63028)                                    | 24260 (10571-51284)                                |
| Chile                        | 191 (106-338)                                                                                 | 253993 (141123-451107)                                          | 999 (552-1792)                                                                        | 1341 (737-2488)                                        | 1086 (594-2017)                                    |
| China                        | 259 (146-460)                                                                                 | 21664371 (12245213-38478707)                                    | 1355 (753-2429)                                                                       | 123010 (66254-368509)                                  | 99749 (53155-299137)                               |
| Colombia                     | 199 (109-359)                                                                                 | 886715 (487441-1599359)                                         | 1042 (565-1905)                                                                       | 5032 (2644-11565)                                      | 4076 (2129-9387)                                   |
| Comoros                      | 466 (267-800)                                                                                 | 39824 (22834-68374)                                             | 2418 (1373-4228)                                                                      | 228 (124-754)                                          | 184 (100-611)                                      |
| Congo                        | 210 (116-382)                                                                                 | 108072 (59727-196704)                                           | 1049 (572-1929)                                                                       | 7323 (3758-14298)                                      | 5935 (3031-11624)                                  |
| Cook Islands                 | 259 (146-461)                                                                                 | 565 (318-1006)                                                  | 1355 (755-2434)                                                                       | 4 (2-12)                                               | 3 (1-10)                                           |
| Costa Rica                   | 190 (106-338)                                                                                 | 75133 (41738-133190)                                            | 999 (550-1793)                                                                        | 398 (218-740)                                          | 322 (176-603)                                      |
| Cote d'Ivoire                | 315 (184-546)                                                                                 | 831445 (484438-1440515)                                         | 1527 (882-2672)                                                                       | 73607 (38051-139556)                                   | 59479 (30609-113495)                               |
| Dem. Peoples's Rep. of Korea | 341 (203-575)                                                                                 | 676397 (401937-1139705)                                         | 1770 (1042-3014)                                                                      | 3511 (2066-5977)                                       | 2837 (1664-4851)                                   |
| Dem. Rep. of the Congo       | 413 (248-685)                                                                                 | 3650795 (2197093-6059257)                                       | 2122 (1265-3565)                                                                      | 60481 (30828-115511)                                   | 48864 (24850-93872)                                |
| Djibouti                     | 193 (105-351)                                                                                 | 19012 (10360-34615)                                             | 995 (540-1824)                                                                        | 375 (180-751)                                          | 303 (145-608)                                      |
| Dominica                     | 190 (106-338)                                                                                 | 1324 (738-2351)                                                 | 999 (552-1792)                                                                        | 7 (4-13)                                               | 6 (3-11)                                           |
| Dominican Republic           | 187 (103-334)                                                                                 | 191800 (105433-343156)                                          | 969 (526-1746)                                                                        | 3106 (751-12577)                                       | 2519 (607-10197)                                   |
| Ecuador                      | 191 (106-338)                                                                                 | 286484 (158824-508053)                                          | 999 (551-1795)                                                                        | 1537 (839-3056)                                        | 1245 (675-2485)                                    |
| Egypt                        | 151 (78-287)                                                                                  | 1177828 (607352-2238003)                                        | 798 (408-1526)                                                                        | 6229 (3185-11916)                                      | 5057 (2575-9728)                                   |
| El Salvador                  | 265 (153-456)                                                                                 | 205855 (118928-354492)                                          | 1376 (788-2393)                                                                       | 1128 (624-2290)                                        | 912 (503-1855)                                     |
| Equatorial Guinea            | 287 (172-481)                                                                                 | 24450 (14649-40939)                                             | 1468 (873-2493)                                                                       | 624 (313-1208)                                         | 504 (252-981)                                      |
| Eritrea                      | 376 (225-626)                                                                                 | 252602 (151360-420420)                                          | 1935 (1148-3256)                                                                      | 3819 (1767-7705)                                       | 3083 (1425-6238)                                   |
| Ethiopia                     | 349 (192-602)                                                                                 | 4315381 (2372433-7441136)                                       | 1734 (946-2999)                                                                       | 249513 (132475-444146)                                 | 201532 (106512-360140)                             |

| Country                           | Incidence of clinical pneumonia (per 1000 children per year) in children younger than 5 years | Episodes of clinical pneumonia in children younger than 5 years | Incidence of clinical pneumonia in HIV infected children (per 1000 children per year) | Episode of clinical pneumonia in HIV infected children | Episodes of clinical pneumonia attributable to HIV |
|-----------------------------------|-----------------------------------------------------------------------------------------------|-----------------------------------------------------------------|---------------------------------------------------------------------------------------|--------------------------------------------------------|----------------------------------------------------|
| <b>Fiji</b>                       | 259 (146-461)                                                                                 | 25507 (14382-45446)                                             | 1356 (754-2431)                                                                       | 146 (78-436)                                           | 118 (63-354)                                       |
| <b>Gabon</b>                      | 323 (184-570)                                                                                 | 59423 (33903-104862)                                            | 1629 (917-2895)                                                                       | 2394 (1206-4723)                                       | 1933 (973-3834)                                    |
| <b>Gambia</b>                     | 374 (224-622)                                                                                 | 86442 (51801-143743)                                            | 1937 (1149-3259)                                                                      | 702 (333-1595)                                         | 567 (268-1291)                                     |
| <b>Ghana</b>                      | 286 (161-483)                                                                                 | 816597 (459248-1380859)                                         | 1454 (814-2498)                                                                       | 25458 (11905-51720)                                    | 20554 (9586-41929)                                 |
| <b>Grenada</b>                    | 191 (106-338)                                                                                 | 1993 (1112-3532)                                                | 999 (551-1786)                                                                        | 11 (6-19)                                              | 9 (5-16)                                           |
| <b>Guatemala</b>                  | 388 (233-649)                                                                                 | 721079 (432287-1207098)                                         | 2014 (1188-3409)                                                                      | 3817 (2246-7170)                                       | 3082 (1805-5817)                                   |
| <b>Guinea</b>                     | 313 (187-524)                                                                                 | 472902 (282938-792242)                                          | 1611 (953-2724)                                                                       | 6397 (2921-13360)                                      | 5160 (2344-10844)                                  |
| <b>Guinea-Bissau</b>              | 384 (230-643)                                                                                 | 82753 (49494-138394)                                            | 1937 (1147-3256)                                                                      | 3368 (1833-6129)                                       | 2723 (1475-4983)                                   |
| <b>Guyana</b>                     | 265 (153-459)                                                                                 | 23147 (13409-40094)                                             | 1376 (787-2411)                                                                       | 144 (76-330)                                           | 116 (61-267)                                       |
| <b>Haiti</b>                      | 317 (169-558)                                                                                 | 387837 (207366-682802)                                          | 1597 (848-2842)                                                                       | 15817 (7937-29997)                                     | 12780 (6378-24403)                                 |
| <b>Honduras</b>                   | 201 (118-347)                                                                                 | 189792 (110776-327403)                                          | 1044 (603-1820)                                                                       | 2177 (1063-4383)                                       | 1760 (858-3569)                                    |
| <b>India</b>                      | 366 (219-613)                                                                                 | 45046369 (26965775-75354251)                                    | 1902 (1125-3197)                                                                      | 233949 (138393-393122)                                 | 189006 (110999-319705)                             |
| <b>Indonesia</b>                  | 487 (288-815)                                                                                 | 10234904 (6048250-17145028)                                     | 2526 (1465-4288)                                                                      | 53117 (30817-90179)                                    | 42901 (24758-73130)                                |
| <b>Iran (Islamic Republic of)</b> | 302 (160-593)                                                                                 | 1909614 (1010586-3748381)                                       | 1581 (827-3124)                                                                       | 10062 (5241-20226)                                     | 8134 (4227-16400)                                  |
| <b>Iraq</b>                       | 191 (104-347)                                                                                 | 736872 (402841-1341896)                                         | 996 (538-1821)                                                                        | 3850 (2081-7037)                                       | 3111 (1673-5724)                                   |
| <b>Jamaica</b>                    | 191 (107-340)                                                                                 | 54224 (30190-96254)                                             | 999 (551-1798)                                                                        | 557 (227-1333)                                         | 452 (183-1083)                                     |
| <b>Jordan</b>                     | 283 (136-586)                                                                                 | 196313 (94252-406342)                                           | 1470 (703-3079)                                                                       | 1021 (489-2141)                                        | 825 (394-1739)                                     |
| <b>Kenya</b>                      | 402 (230-694)                                                                                 | 2052821 (1174951-3545949)                                       | 1892 (1076-3320)                                                                      | 243421 (133266-441954)                                 | 196827 (107284-359187)                             |
| <b>Kiribati</b>                   | 259 (146-460)                                                                                 | 2568 (1447-4567)                                                | 1355 (757-2425)                                                                       | 15 (8-46)                                              | 12 (6-37)                                          |
| <b>Kuwait</b>                     | 302 (159-592)                                                                                 | 56363 (29726-110517)                                            | 1579 (825-3113)                                                                       | 296 (155-598)                                          | 240 (125-486)                                      |



| Country                     | Incidence of clinical pneumonia (per 1000 children per year) in children younger than 5 years | Episodes of clinical pneumonia in children younger than 5 years | Incidence of clinical pneumonia in HIV infected children (per 1000 children per year) | Episode of clinical pneumonia in HIV infected children | Episodes of clinical pneumonia attributable to HIV |
|-----------------------------|-----------------------------------------------------------------------------------------------|-----------------------------------------------------------------|---------------------------------------------------------------------------------------|--------------------------------------------------------|----------------------------------------------------|
| Lao People's Dem. Republic  | 460 (248-799)                                                                                 | 374893 (202336-651223)                                          | 2386 (1276-4188)                                                                      | 1945 (1040-3413)                                       | 1571 (838-2771)                                    |
| Lebanon                     | 302 (160-592)                                                                                 | 92236 (48850-180689)                                            | 1580 (828-3108)                                                                       | 485 (253-979)                                          | 393 (204-794)                                      |
| Lesotho                     | 380 (227-641)                                                                                 | 102662 (61166-172908)                                           | 1627 (958-2773)                                                                       | 23007 (13242-40055)                                    | 18598 (10655-32523)                                |
| Liberia                     | 240 (128-434)                                                                                 | 119385 (63357-215525)                                           | 1231 (647-2234)                                                                       | 3517 (1696-7050)                                       | 2847 (1366-5725)                                   |
| Libyan Arab Jamahiriya      | 302 (160-593)                                                                                 | 165612 (87544-325316)                                           | 1579 (827-3115)                                                                       | 871 (455-1731)                                         | 705 (367-1402)                                     |
| Madagascar                  | 456 (274-755)                                                                                 | 1296879 (777902-2144110)                                        | 2357 (1402-3949)                                                                      | 9540 (4726-24034)                                      | 7705 (3797-19558)                                  |
| Malawi                      | 396 (235-669)                                                                                 | 811482 (481185-1370637)                                         | 1758 (1028-3006)                                                                      | 149884 (86737-257893)                                  | 121128 (69795-209479)                              |
| Malaysia                    | 460 (247-801)                                                                                 | 1252567 (672604-2180834)                                        | 2385 (1276-4201)                                                                      | 6490 (3471-11430)                                      | 5245 (2794-9263)                                   |
| Maldives                    | 207 (116-372)                                                                                 | 7140 (4021-12830)                                               | 1095 (607-1977)                                                                       | 38 (21-68)                                             | 31 (17-56)                                         |
| Mali                        | 362 (214-607)                                                                                 | 694702 (411142-1165704)                                         | 1855 (1089-3136)                                                                      | 13650 (6707-26332)                                     | 11023 (5403-21371)                                 |
| Marshall Islands            | 259 (146-461)                                                                                 | 1620 (912-2884)                                                 | 1356 (755-2427)                                                                       | 9 (5-30)                                               | 8 (4-25)                                           |
| Mauritania                  | 325 (197-534)                                                                                 | 143839 (86991-236454)                                           | 1685 (1010-2820)                                                                      | 906 (493-2321)                                         | 733 (397-1887)                                     |
| Mauritius                   | 283 (169-471)                                                                                 | 27851 (16707-46445)                                             | 1468 (873-2485)                                                                       | 146 (87-263)                                           | 118 (70-214)                                       |
| Mexico                      | 191 (106-338)                                                                                 | 2343698 (1305052-4157848)                                       | 999 (553-1792)                                                                        | 12343 (6805-22718)                                     | 9997 (5480-18403)                                  |
| Micronesia (Fed. States of) | 259 (146-460)                                                                                 | 3879 (2194-6895)                                                | 1355 (755-2427)                                                                       | 22 (12-69)                                             | 18 (10-56)                                         |
| Mongolia                    | 259 (146-458)                                                                                 | 60535 (34233-107205)                                            | 1355 (753-2426)                                                                       | 343 (183-1015)                                         | 278 (147-826)                                      |
| Morocco                     | 263 (148-464)                                                                                 | 821577 (461136-1447938)                                         | 1368 (760-2438)                                                                       | 4272 (2374-7628)                                       | 3453 (1907-6206)                                   |
| Mozambique                  | 405 (243-677)                                                                                 | 1287681 (771694-2151012)                                        | 2003 (1189-3368)                                                                      | 82950 (46307-147298)                                   | 67018 (37264-119272)                               |
| Myanmar                     | 353 (195-635)                                                                                 | 1715988 (945637-3081256)                                        | 1836 (1001-3325)                                                                      | 9168 (4930-17672)                                      | 7407 (3972-14306)                                  |
| Namibia                     | 372 (224-622)                                                                                 | 102839 (61903-171772)                                           | 1712 (1020-2890)                                                                      | 15194 (8706-26572)                                     | 12283 (6991-21557)                                 |
| Nauru                       | 259 (146-461)                                                                                 | 312 (176-555)                                                   | 1355 (757-2429)                                                                       | 2 (1-8)                                                | 2 (1-7)                                            |

| Country                      | Incidence of clinical pneumonia (per 1000 children per year) in children younger than 5 years | Episodes of clinical pneumonia in children younger than 5 years | Incidence of clinical pneumonia in HIV infected children (per 1000 children per year) | Episode of clinical pneumonia in HIV infected children | Episodes of clinical pneumonia attributable to HIV |
|------------------------------|-----------------------------------------------------------------------------------------------|-----------------------------------------------------------------|---------------------------------------------------------------------------------------|--------------------------------------------------------|----------------------------------------------------|
| Nepal                        | 336 (195-579)                                                                                 | 1164550 (677745-2008253)                                        | 1747 (1011-3042)                                                                      | 6069 (3511-10624)                                      | 4909 (2813-8646)                                   |
| Nicaragua                    | 236 (135-411)                                                                                 | 166240 (94929-289477)                                           | 1227 (694-2163)                                                                       | 866 (489-1538)                                         | 701 (393-1246)                                     |
| Niger                        | 519 (295-889)                                                                                 | 1173726 (666126-2009603)                                        | 2686 (1506-4642)                                                                      | 10130 (4465-23403)                                     | 8178 (3600-18953)                                  |
| Nigeria                      | 401 (220-694)                                                                                 | 8459265 (4643080-14631547)                                      | 2039 (1111-3569)                                                                      | 254032 (124773-489847)                                 | 204837 (100444-397171)                             |
| Niue                         | 467 (251-812)                                                                                 | 109 (58-189)                                                    | 2386 (1277-4182)                                                                      | 2 (1-5)                                                | 2 (1-4)                                            |
| Oman                         | 302 (160-594)                                                                                 | 81486 (43251-160364)                                            | 1580 (828-3126)                                                                       | 431 (224-876)                                          | 349 (181-711)                                      |
| Pakistan                     | 195 (104-358)                                                                                 | 4099287 (2188254-7533266)                                       | 1012 (535-1870)                                                                       | 21309 (11257-39354)                                    | 17200 (9075-32022)                                 |
| Palau                        | 460 (248-799)                                                                                 | 1058 (569-1838)                                                 | 2384 (1279-4184)                                                                      | 6 (3-10)                                               | 4 (2-8)                                            |
| Panama                       | 191 (106-338)                                                                                 | 66520 (37104-117916)                                            | 999 (552-1794)                                                                        | 366 (197-785)                                          | 296 (159-638)                                      |
| Papua New Guinea             | 259 (146-461)                                                                                 | 217962 (122918-387468)                                          | 1356 (757-2426)                                                                       | 1830 (758-6413)                                        | 1483 (611-5190)                                    |
| Paraguay                     | 265 (153-456)                                                                                 | 188106 (108930-324473)                                          | 1375 (789-2402)                                                                       | 978 (562-1709)                                         | 791 (451-1391)                                     |
| Peru                         | 197 (112-348)                                                                                 | 593405 (336178-1044596)                                         | 1030 (580-1838)                                                                       | 3123 (1758-5624)                                       | 2527 (1414-4568)                                   |
| Philippines                  | 521 (306-885)                                                                                 | 5569601 (3263920-9457115)                                       | 2705 (1564-4640)                                                                      | 28893 (16715-49616)                                    | 23351 (13433-40141)                                |
| Qatar                        | 302 (160-595)                                                                                 | 16773 (8877-33019)                                              | 1580 (826-3121)                                                                       | 88 (46-177)                                            | 71 (37-143)                                        |
| Republic of Korea            | 259 (146-460)                                                                                 | 809678 (455843-1440605)                                         | 1355 (758-2428)                                                                       | 4591 (2456-13273)                                      | 3725 (1973-10831)                                  |
| Rwanda                       | 237 (137-404)                                                                                 | 397823 (228977-677865)                                          | 1189 (680-2049)                                                                       | 19478 (10612-35151)                                    | 15725 (8541-28588)                                 |
| Saint Kitts and Nevis        | 191 (106-338)                                                                                 | 867 (481-1537)                                                  | 999 (553-1789)                                                                        | 5 (3-9)                                                | 4 (2-7)                                            |
| Saint Lucia                  | 191 (106-339)                                                                                 | 3020 (1686-5363)                                                | 999 (553-1797)                                                                        | 16 (9-29)                                              | 13 (7-24)                                          |
| Saint Vincent and Grenadines | 191 (106-338)                                                                                 | 2085 (1158-3696)                                                | 999 (552-1791)                                                                        | 11 (6-20)                                              | 9 (5-16)                                           |
| Samoa                        | 258 (145-460)                                                                                 | 6615 (3724-11778)                                               | 1353 (758-2431)                                                                       | 38 (20-114)                                            | 31 (16-93)                                         |
| Sao Tome and Principe        | 331 (200-544)                                                                                 | 7162 (4339-11775)                                               | 1685 (1014-2812)                                                                      | 204 (101-395)                                          | 165 (82-320)                                       |

| Country                     | Incidence of clinical pneumonia (per 1000 children per year) in children younger than 5 years | Episodes of clinical pneumonia in children younger than 5 years | Incidence of clinical pneumonia in HIV infected children (per 1000 children per year) | Episode of clinical pneumonia in HIV infected children | Episodes of clinical pneumonia attributable to HIV |
|-----------------------------|-----------------------------------------------------------------------------------------------|-----------------------------------------------------------------|---------------------------------------------------------------------------------------|--------------------------------------------------------|----------------------------------------------------|
| <b>Saudi Arabia</b>         | 302 (160-592)                                                                                 | 846478 (447812-1658882)                                         | 1578 (827-3109)                                                                       | 4451 (2327-8919)                                       | 3598 (1874-7245)                                   |
| <b>Senegal</b>              | 278 (167-469)                                                                                 | 467974 (282049-790009)                                          | 1440 (857-2448)                                                                       | 3053 (1628-6775)                                       | 2466 (1311-5493)                                   |
| <b>Seychelles</b>           | 282 (170-471)                                                                                 | 2054 (1235-3426)                                                | 1468 (874-2481)                                                                       | 11 (6-19)                                              | 9 (5-15)                                           |
| <b>Sierra Leone</b>         | 385 (228-649)                                                                                 | 270598 (160436-456733)                                          | 1996 (1173-3396)                                                                      | 1821 (943-4337)                                        | 1472 (756-3513)                                    |
| <b>Solomon Islands</b>      | 259 (146-460)                                                                                 | 16733 (9415-29777)                                              | 1355 (753-2426)                                                                       | 95 (51-278)                                            | 77 (41-227)                                        |
| <b>Somalia</b>              | 576 (313-1037)                                                                                | 845515 (460326-1522995)                                         | 2980 (1611-5414)                                                                      | 5839 (2831-12872)                                      | 4715 (2278-10478)                                  |
| <b>South Africa</b>         | 473 (275-817)                                                                                 | 2287592 (1327850-3950583)                                       | 2212 (1263-3861)                                                                      | 293956 (163330-521477)                                 | 237464 (131595-423254)                             |
| <b>Sri Lanka</b>            | 237 (133-431)                                                                                 | 393835 (221526-715052)                                          | 1237 (689-2256)                                                                       | 2054 (1144-3746)                                       | 1662 (920-3035)                                    |
| <b>Sudan</b>                | 191 (104-347)                                                                                 | 902948 (491641-1643377)                                         | 995 (539-1821)                                                                        | 4711 (2549-8636)                                       | 3810 (2054-7030)                                   |
| <b>Suriname</b>             | 191 (106-338)                                                                                 | 9634 (5353-17033)                                               | 1000 (549-1792)                                                                       | 88 (37-214)                                            | 71 (30-173)                                        |
| <b>Swaziland</b>            | 441 (263-735)                                                                                 | 69222 (41325-115306)                                            | 1937 (1149-3249)                                                                      | 13442 (7829-22820)                                     | 10856 (6301-18547)                                 |
| <b>Syrian Arab Republic</b> | 191 (104-346)                                                                                 | 457405 (249915-830569)                                          | 995 (537-1823)                                                                        | 2387 (1289-4372)                                       | 1929 (1039-3557)                                   |
| <b>Thailand</b>             | 207 (104-406)                                                                                 | 967387 (487365-1892866)                                         | 1079 (538-2132)                                                                       | 5706 (2746-11858)                                      | 4612 (2216-9640)                                   |
| <b>Timor-Leste</b>          | 328 (179-580)                                                                                 | 57165 (31217-101160)                                            | 1701 (918-3038)                                                                       | 297 (160-530)                                          | 239 (129-430)                                      |
| <b>Togo</b>                 | 513 (287-894)                                                                                 | 414104 (231712-721224)                                          | 2554 (1420-4517)                                                                      | 22939 (11807-43200)                                    | 18520 (9520-35137)                                 |
| <b>Tonga</b>                | 259 (146-459)                                                                                 | 3443 (1941-6108)                                                | 1355 (753-2423)                                                                       | 20 (11-61)                                             | 16 (8-50)                                          |
| <b>Trinidad and Tobago</b>  | 191 (107-338)                                                                                 | 17113 (9553-30309)                                              | 999 (550-1790)                                                                        | 124 (57-320)                                           | 101 (46-260)                                       |
| <b>Tunisia</b>              | 271 (140-555)                                                                                 | 225313 (116572-461328)                                          | 1423 (730-2916)                                                                       | 1296 (634-3868)                                        | 1049 (511-3135)                                    |
| <b>Tuvalu</b>               | 259 (146-462)                                                                                 | 299 (168-533)                                                   | 1354 (756-2436)                                                                       | 2 (1-8)                                                | 2 (1-6)                                            |
| <b>Uganda</b>               | 287 (170-482)                                                                                 | 1384676 (822972-2328519)                                        | 1388 (821-2360)                                                                       | 119754 (69045-210786)                                  | 96713 (55411-170809)                               |
| <b>United Arab Emirates</b> | 302 (160-593)                                                                                 | 78282 (41430-153692)                                            | 1581 (824-3115)                                                                       | 413 (214-822)                                          | 334 (174-668)                                      |

| Country                            | Incidence of clinical pneumonia (per 1000 children per year) in children younger than 5 years | Episodes of clinical pneumonia in children younger than 5 years | Incidence of clinical pneumonia in HIV infected children (per 1000 children per year) | Episode of clinical pneumonia in HIV infected children | Episodes of clinical pneumonia attributable to HIV |
|------------------------------------|-----------------------------------------------------------------------------------------------|-----------------------------------------------------------------|---------------------------------------------------------------------------------------|--------------------------------------------------------|----------------------------------------------------|
| <b>United Republic of Tanzania</b> | 281 (170-465)                                                                                 | 1655983 (1003583-2747126)                                       | 1328 (798-2235)                                                                       | 194405 (110677-342126)                                 | 157023 (89146-277747)                              |
| <b>Uruguay</b>                     | 190 (106-337)                                                                                 | 51639 (28699-91377)                                             | 1000 (551-1793)                                                                       | 274 (150-510)                                          | 222 (121-415)                                      |
| <b>Vanuatu</b>                     | 259 (146-458)                                                                                 | 7326 (4136-12986)                                               | 1353 (758-2425)                                                                       | 42 (22-126)                                            | 34 (18-102)                                        |
| <b>Venezuela</b>                   | 191 (106-339)                                                                                 | 530593 (295687-942111)                                          | 1000 (551-1791)                                                                       | 2954 (1593-6553)                                       | 2394 (1281-5333)                                   |
| <b>Viet Nam</b>                    | 259 (147-460)                                                                                 | 1844250 (1046715-3278031)                                       | 1353 (756-2419)                                                                       | 10797 (5688-34320)                                     | 8747 (4590-27785)                                  |
| <b>Yemen</b>                       | 191 (104-347)                                                                                 | 593564 (325017-1079034)                                         | 996 (537-1824)                                                                        | 3100 (1671-5679)                                       | 2505 (1347-4615)                                   |
| <b>Zambia</b>                      | 438 (257-747)                                                                                 | 817804 (478902-1393559)                                         | 1980 (1150-3414)                                                                      | 134456 (76937-233500)                                  | 108548 (61775-189297)                              |
| <b>Zimbabwe</b>                    | 339 (198-579)                                                                                 | 613876 (358127-1047587)                                         | 1405 (813-2434)                                                                       | 156959 (89530-276565)                                  | 126760 (72075-224531)                              |

Supplementary table 5: Incidence and episodes of severe pneumonia in children younger than 5 years in 2000

| Country                         | Incidence of severe pneumonia (per 1000 children per year) in children younger than 5 years | Episodes of severe pneumonia in children younger than 5 years | Incidence of severe pneumonia in HIV infected children (per 1000 children per year) | Episode of severe pneumonia in HIV infected children | Episodes of severe pneumonia attributable to HIV |
|---------------------------------|---------------------------------------------------------------------------------------------|---------------------------------------------------------------|-------------------------------------------------------------------------------------|------------------------------------------------------|--------------------------------------------------|
| <b>Afghanistan</b>              | 95 (35-233)                                                                                 | 407117 (148652-992565)                                        | 497 (181-1213)                                                                      | 2118 (773-5171)                                      | 1711 (624-4195)                                  |
| <b>Algeria</b>                  | 45 (17-101)                                                                                 | 140737 (54214-313443)                                         | 236 (91-528)                                                                        | 740 (284-1678)                                       | 598 (229-1360)                                   |
| <b>Angola</b>                   | 53 (20-116)                                                                                 | 143488 (55826-315880)                                         | 271 (105-603)                                                                       | 2244 (716-6148)                                      | 1817 (577-4979)                                  |
| <b>Antigua and Barbuda</b>      | 30 (11-72)                                                                                  | 236 (88-555)                                                  | 159 (59-377)                                                                        | 1 (0-3)                                              | 1 (0-2)                                          |
| <b>Argentina</b>                | 30 (11-71)                                                                                  | 105073 (38910-246476)                                         | 160 (59-377)                                                                        | 557 (207-1336)                                       | 451 (167-1083)                                   |
| <b>Bahamas</b>                  | 31 (11-72)                                                                                  | 858 (317-2013)                                                | 159 (59-377)                                                                        | 7 (2-21)                                             | 6 (2-17)                                         |
| <b>Bahrain</b>                  | 49 (17-121)                                                                                 | 3516 (1259-8752)                                              | 253 (91-632)                                                                        | 18 (7-47)                                            | 15 (5-38)                                        |
| <b>Bangladesh</b>               | 58 (23-128)                                                                                 | 970148 (378020-2149954)                                       | 301 (116-669)                                                                       | 5036 (1949-11205)                                    | 4071 (1567-9077)                                 |
| <b>Barbados</b>                 | 30 (11-72)                                                                                  | 563 (208-1324)                                                | 159 (59-377)                                                                        | 3 (1-7)                                              | 2 (1-6)                                          |
| <b>Belize</b>                   | 43 (16-97)                                                                                  | 1463 (559-3339)                                               | 220 (83-506)                                                                        | 16 (5-44)                                            | 13 (4-36)                                        |
| <b>Benin</b>                    | 83 (32-189)                                                                                 | 103760 (39250-235194)                                         | 430 (163-980)                                                                       | 1707 (532-4711)                                      | 1376 (428-3802)                                  |
| <b>Bhutan</b>                   | 35 (13-82)                                                                                  | 2600 (959-6155)                                               | 182 (67-432)                                                                        | 14 (5-33)                                            | 11 (4-26)                                        |
| <b>Bolivia</b>                  | 44 (17-103)                                                                                 | 54060 (20115-126020)                                          | 231 (86-543)                                                                        | 297 (109-753)                                        | 240 (88-611)                                     |
| <b>Botswana</b>                 | 70 (27-156)                                                                                 | 15936 (6133-35350)                                            | 311 (119-696)                                                                       | 2970 (1138-6717)                                     | 2398 (917-5461)                                  |
| <b>Brazil</b>                   | 39 (14-94)                                                                                  | 678996 (245811-1638881)                                       | 203 (73-493)                                                                        | 3676 (1316-9516)                                     | 2969 (1064-7732)                                 |
| <b>Burkina Faso</b>             | 56 (21-125)                                                                                 | 121027 (46372-272093)                                         | 282 (108-640)                                                                       | 4514 (1650-10948)                                    | 3646 (1329-8857)                                 |
| <b>Burundi</b>                  | 61 (23-135)                                                                                 | 72867 (28042-161192)                                          | 311 (120-694)                                                                       | 2047 (743-5045)                                      | 1653 (597-4097)                                  |
| <b>Cambodia</b>                 | 73 (27-171)                                                                                 | 109120 (40440-253904)                                         | 379 (140-888)                                                                       | 1074 (346-2900)                                      | 868 (278-2349)                                   |
| <b>Cameroon</b>                 | 39 (15-87)                                                                                  | 106900 (40982-239230)                                         | 192 (74-434)                                                                        | 6797 (2353-17506)                                    | 5494 (1902-14244)                                |
| <b>Cape Verde</b>               | 52 (20-115)                                                                                 | 3238 (1255-7110)                                              | 271 (104-604)                                                                       | 23 (8-71)                                            | 18 (6-58)                                        |
| <b>Central African Republic</b> | 86 (32-195)                                                                                 | 50667 (19195-115462)                                          | 415 (157-951)                                                                       | 4322 (1604-10467)                                    | 3491 (1294-8457)                                 |

| Country                             | Incidence of severe pneumonia (per 1000 children per year) in children younger than 5 years | Episodes of severe pneumonia in children younger than 5 years | Incidence of severe pneumonia in HIV infected children (per 1000 children per year) | Episode of severe pneumonia in HIV infected children | Episodes of severe pneumonia attributable to HIV |
|-------------------------------------|---------------------------------------------------------------------------------------------|---------------------------------------------------------------|-------------------------------------------------------------------------------------|------------------------------------------------------|--------------------------------------------------|
| <b>Chad</b>                         | 84 (31-200)                                                                                 | 141824 (51626-336983)                                         | 426 (156-1024)                                                                      | 4771 (1579-12801)                                    | 3854 (1273-10372)                                |
| <b>Chile</b>                        | 30 (11-72)                                                                                  | 40565 (15081-95442)                                           | 159 (59-378)                                                                        | 214 (80-515)                                         | 173 (65-419)                                     |
| <b>China</b>                        | 42 (16-98)                                                                                  | 3479385 (1302888-8200548)                                     | 217 (82-516)                                                                        | 20105 (7275-66755)                                   | 16292 (5876-54079)                               |
| <b>Colombia</b>                     | 32 (12-76)                                                                                  | 141751 (51964-338603)                                         | 167 (61-397)                                                                        | 812 (287-2245)                                       | 659 (233-1820)                                   |
| <b>Comoros</b>                      | 75 (28-169)                                                                                 | 6391 (2396-14478)                                             | 388 (146-888)                                                                       | 38 (13-132)                                          | 30 (11-106)                                      |
| <b>Congo</b>                        | 34 (12-81)                                                                                  | 17391 (6397-41409)                                            | 169 (62-403)                                                                        | 1182 (417-2919)                                      | 957 (337-2377)                                   |
| <b>Cook Islands</b>                 | 42 (16-98)                                                                                  | 91 (34-215)                                                   | 218 (82-516)                                                                        | 1 (0-2)                                              | 0 (0-2)                                          |
| <b>Costa Rica</b>                   | 30 (11-71)                                                                                  | 12007 (4464-28160)                                            | 159 (59-377)                                                                        | 64 (24-152)                                          | 51 (19-124)                                      |
| <b>Cote d'Ivoire</b>                | 51 (19-115)                                                                                 | 133774 (50949-302183)                                         | 246 (93-560)                                                                        | 11791 (4255-28418)                                   | 9522 (3441-23087)                                |
| <b>Dem. Peoples's Rep. of Korea</b> | 55 (21-122)                                                                                 | 108473 (42180-242819)                                         | 284 (109-637)                                                                       | 563 (217-1264)                                       | 455 (174-1029)                                   |
| <b>Dem. Rep. of the Congo</b>       | 66 (25-145)                                                                                 | 585545 (224676-1286089)                                       | 341 (132-757)                                                                       | 9671 (3462-23971)                                    | 7806 (2796-19342)                                |
| <b>Djibouti</b>                     | 31 (11-74)                                                                                  | 3039 (1117-7281)                                              | 159 (58-383)                                                                        | 60 (20-155)                                          | 48 (16-126)                                      |
| <b>Dominica</b>                     | 30 (11-72)                                                                                  | 212 (79-498)                                                  | 159 (59-377)                                                                        | 1 (0-3)                                              | 1 (0-2)                                          |
| <b>Dominican Republic</b>           | 30 (11-70)                                                                                  | 30690 (11207-72350)                                           | 155 (57-367)                                                                        | 479 (96-2354)                                        | 388 (77-1913)                                    |
| <b>Ecuador</b>                      | 30 (11-71)                                                                                  | 45739 (16954-107112)                                          | 159 (59-376)                                                                        | 247 (91-618)                                         | 200 (73-502)                                     |
| <b>Egypt</b>                        | 24 (8-60)                                                                                   | 187682 (66308-467353)                                         | 127 (45-319)                                                                        | 994 (350-2489)                                       | 806 (283-2029)                                   |
| <b>El Salvador</b>                  | 42 (16-97)                                                                                  | 32954 (12536-75067)                                           | 220 (83-507)                                                                        | 182 (68-457)                                         | 147 (54-371)                                     |
| <b>Equatorial Guinea</b>            | 46 (18-103)                                                                                 | 3926 (1517-8740)                                              | 236 (91-527)                                                                        | 99 (36-247)                                          | 80 (29-201)                                      |
| <b>Eritrea</b>                      | 60 (23-133)                                                                                 | 40521 (15540-89563)                                           | 311 (120-696)                                                                       | 609 (207-1578)                                       | 492 (167-1283)                                   |
| <b>Ethiopia</b>                     | 55 (21-128)                                                                                 | 684397 (254500-1578045)                                       | 275 (102-639)                                                                       | 39752 (14434-93770)                                  | 32094 (11694-76032)                              |
| <b>Fiji</b>                         | 42 (16-99)                                                                                  | 4093 (1534-9716)                                              | 218 (82-515)                                                                        | 24 (9-80)                                            | 19 (7-65)                                        |
| <b>Gabon</b>                        | 52 (20-120)                                                                                 | 9535 (3609-21998)                                             | 262 (98-605)                                                                        | 385 (136-974)                                        | 312 (109-790)                                    |

| Country                    | Incidence of severe pneumonia (per 1000 children per year) in children younger than 5 years | Episodes of severe pneumonia in children younger than 5 years | Incidence of severe pneumonia in HIV infected children (per 1000 children per year) | Episode of severe pneumonia in HIV infected children | Episodes of severe pneumonia attributable to HIV |
|----------------------------|---------------------------------------------------------------------------------------------|---------------------------------------------------------------|-------------------------------------------------------------------------------------|------------------------------------------------------|--------------------------------------------------|
| Gambia                     | 60 (23-133)                                                                                 | 13868 (5346-30643)                                            | 312 (120-694)                                                                       | 112 (37-324)                                         | 91 (30-262)                                      |
| Ghana                      | 45 (17-103)                                                                                 | 130056 (48700-295604)                                         | 232 (87-532)                                                                        | 4044 (1372-10508)                                    | 3266 (1105-8527)                                 |
| Grenada                    | 30 (11-72)                                                                                  | 318 (118-748)                                                 | 159 (59-375)                                                                        | 2 (1-4)                                              | 1 (1-3)                                          |
| Guatemala                  | 62 (24-138)                                                                                 | 115625 (44268-256059)                                         | 323 (124-725)                                                                       | 616 (234-1446)                                       | 498 (187-1172)                                   |
| Guinea                     | 50 (19-111)                                                                                 | 75504 (29397-167949)                                          | 259 (100-581)                                                                       | 1016 (341-2724)                                      | 821 (275-2214)                                   |
| Guinea-Bissau              | 62 (24-137)                                                                                 | 13261 (5093-29388)                                            | 311 (120-695)                                                                       | 540 (198-1297)                                       | 437 (160-1054)                                   |
| Guyana                     | 42 (16-97)                                                                                  | 3710 (1414-8475)                                              | 221 (83-506)                                                                        | 23 (8-64)                                            | 19 (7-52)                                        |
| Haiti                      | 51 (18-118)                                                                                 | 61833 (22539-143948)                                          | 255 (94-598)                                                                        | 2522 (888-6175)                                      | 2035 (714-5007)                                  |
| Honduras                   | 32 (12-74)                                                                                  | 30479 (11692-69425)                                           | 168 (64-387)                                                                        | 350 (120-891)                                        | 283 (97-724)                                     |
| India                      | 59 (23-130)                                                                                 | 7233149 (2813037-15998283)                                    | 305 (117-682)                                                                       | 37560 (14391-83832)                                  | 30312 (11615-67752)                              |
| Indonesia                  | 78 (30-175)                                                                                 | 1646114 (631674-3682083)                                      | 406 (155-916)                                                                       | 8541 (3261-19269)                                    | 6901 (2633-15675)                                |
| Iran (Islamic Republic of) | 48 (17-121)                                                                                 | 306182 (109807-763377)                                        | 253 (91-632)                                                                        | 1617 (574-4104)                                      | 1308 (462-3318)                                  |
| Iraq                       | 30 (11-73)                                                                                  | 117867 (43210-281592)                                         | 159 (58-383)                                                                        | 614 (224-1481)                                       | 496 (181-1200)                                   |
| Jamaica                    | 31 (11-72)                                                                                  | 8658 (3199-20308)                                             | 159 (59-377)                                                                        | 88 (27-264)                                          | 71 (22-215)                                      |
| Jordan                     | 45 (15-119)                                                                                 | 31354 (10634-82751)                                           | 236 (80-621)                                                                        | 164 (55-432)                                         | 132 (45-349)                                     |
| Kenya                      | 64 (24-147)                                                                                 | 329125 (123806-751818)                                        | 304 (114-700)                                                                       | 39024 (14282-92540)                                  | 31493 (11553-75008)                              |
| Kiribati                   | 42 (16-98)                                                                                  | 412 (154-975)                                                 | 217 (82-513)                                                                        | 2 (1-9)                                              | 2 (1-7)                                          |
| Kuwait                     | 48 (17-121)                                                                                 | 9034 (3238-22573)                                             | 254 (90-633)                                                                        | 48 (17-120)                                          | 39 (14-97)                                       |
| Lao People's Dem. Republic | 73 (27-170)                                                                                 | 59599 (22027-138464)                                          | 379 (140-890)                                                                       | 310 (114-725)                                        | 250 (92-587)                                     |
| Lebanon                    | 48 (17-121)                                                                                 | 14765 (5284-36933)                                            | 254 (90-633)                                                                        | 78 (28-197)                                          | 63 (23-160)                                      |
| Lesotho                    | 61 (23-137)                                                                                 | 16537 (6286-37001)                                            | 261 (100-588)                                                                       | 3701 (1379-8472)                                     | 2989 (1117-6876)                                 |
| Liberia                    | 38 (14-92)                                                                                  | 19038 (6899-45595)                                            | 196 (71-473)                                                                        | 561 (194-1456)                                       | 454 (157-1181)                                   |

| Country                     | Incidence of severe pneumonia (per 1000 children per year) in children younger than 5 years | Episodes of severe pneumonia in children younger than 5 years | Incidence of severe pneumonia in HIV infected children (per 1000 children per year) | Episode of severe pneumonia in HIV infected children | Episodes of severe pneumonia attributable to HIV |
|-----------------------------|---------------------------------------------------------------------------------------------|---------------------------------------------------------------|-------------------------------------------------------------------------------------|------------------------------------------------------|--------------------------------------------------|
| Libyan Arab Jamahiriya      | 48 (17-121)                                                                                 | 26549 (9525-66344)                                            | 254 (90-633)                                                                        | 140 (50-351)                                         | 113 (40-287)                                     |
| Madagascar                  | 73 (28-162)                                                                                 | 208148 (79931-459199)                                         | 379 (146-844)                                                                       | 1550 (522-4691)                                      | 1252 (421-3798)                                  |
| Malawi                      | 64 (24-142)                                                                                 | 130332 (49622-290099)                                         | 282 (107-635)                                                                       | 24023 (9121-54348)                                   | 19408 (7326-43970)                               |
| Malaysia                    | 73 (27-170)                                                                                 | 198915 (73544-462068)                                         | 379 (139-889)                                                                       | 1033 (379-2423)                                      | 834 (306-1963)                                   |
| Maldives                    | 33 (12-78)                                                                                  | 1146 (429-2686)                                               | 176 (65-418)                                                                        | 6 (2-14)                                             | 5 (2-12)                                         |
| Mali                        | 58 (22-130)                                                                                 | 111066 (42610-249128)                                         | 297 (114-670)                                                                       | 2172 (768-5469)                                      | 1754 (619-4431)                                  |
| Marshall Islands            | 42 (16-99)                                                                                  | 260 (97-616)                                                  | 217 (81-518)                                                                        | 2 (1-6)                                              | 1 (0-5)                                          |
| Mauritania                  | 52 (20-115)                                                                                 | 23108 (8967-50825)                                            | 271 (105-604)                                                                       | 150 (53-458)                                         | 121 (43-370)                                     |
| Mauritius                   | 45 (17-101)                                                                                 | 4470 (1722-9954)                                              | 236 (90-528)                                                                        | 24 (9-54)                                            | 19 (7-44)                                        |
| Mexico                      | 30 (11-72)                                                                                  | 374438 (139179-880680)                                        | 159 (59-377)                                                                        | 1969 (730-4693)                                      | 1595 (592-3814)                                  |
| Micronesia (Fed. States of) | 42 (16-98)                                                                                  | 625 (234-1475)                                                | 218 (82-513)                                                                        | 4 (1-12)                                             | 3 (1-10)                                         |
| Mongolia                    | 42 (16-98)                                                                                  | 9719 (3638-22952)                                             | 218 (82-515)                                                                        | 56 (20-184)                                          | 45 (16-150)                                      |
| Morocco                     | 42 (16-98)                                                                                  | 131698 (49231-305515)                                         | 219 (82-513)                                                                        | 683 (254-1605)                                       | 552 (206-1303)                                   |
| Mozambique                  | 65 (25-143)                                                                                 | 206782 (79284-455242)                                         | 322 (124-715)                                                                       | 13291 (4972-31162)                                   | 10737 (4014-25293)                               |
| Myanmar                     | 57 (21-133)                                                                                 | 274575 (102487-645791)                                        | 294 (109-693)                                                                       | 1472 (539-3583)                                      | 1187 (432-2903)                                  |
| Namibia                     | 60 (23-133)                                                                                 | 16533 (6377-36608)                                            | 275 (106-612)                                                                       | 2442 (925-5570)                                      | 1974 (743-4520)                                  |
| Nauru                       | 42 (16-99)                                                                                  | 50 (19-119)                                                   | 217 (82-516)                                                                        | 0 (0-2)                                              | 0 (0-1)                                          |
| Nepal                       | 54 (20-124)                                                                                 | 186708 (70958-429340)                                         | 280 (107-646)                                                                       | 974 (372-2251)                                       | 787 (302-1825)                                   |
| Nicaragua                   | 38 (14-87)                                                                                  | 26628 (10083-61163)                                           | 196 (74-457)                                                                        | 139 (52-323)                                         | 112 (42-261)                                     |
| Niger                       | 83 (31-190)                                                                                 | 187718 (71111-428909)                                         | 430 (162-990)                                                                       | 1614 (514-4711)                                      | 1304 (414-3813)                                  |
| Nigeria                     | 64 (24-148)                                                                                 | 1345997 (501176-3125966)                                      | 325 (121-759)                                                                       | 40425 (14096-102675)                                 | 32663 (11367-83031)                              |
| Niue                        | 74 (27-172)                                                                                 | 17 (6-40)                                                     | 380 (139-891)                                                                       | 0 (0-1)                                              | 0 (0-1)                                          |



| Country                      | Incidence of severe pneumonia (per 1000 children per year) in children younger than 5 years | Episodes of severe pneumonia in children younger than 5 years | Incidence of severe pneumonia in HIV infected children (per 1000 children per year) | Episode of severe pneumonia in HIV infected children | Episodes of severe pneumonia attributable to HIV |
|------------------------------|---------------------------------------------------------------------------------------------|---------------------------------------------------------------|-------------------------------------------------------------------------------------|------------------------------------------------------|--------------------------------------------------|
| Oman                         | 48 (17-121)                                                                                 | 13082 (4691-32610)                                            | 254 (90-635)                                                                        | 69 (25-176)                                          | 56 (20-143)                                      |
| Pakistan                     | 31 (11-74)                                                                                  | 656533 (239498-1563404)                                       | 162 (59-391)                                                                        | 3409 (1238-8229)                                     | 2757 (997-6671)                                  |
| Palau                        | 73 (27-170)                                                                                 | 168 (62-391)                                                  | 380 (139-891)                                                                       | 1 (0-2)                                              | 1 (0-2)                                          |
| Panama                       | 30 (11-71)                                                                                  | 10597 (3934-24870)                                            | 160 (59-377)                                                                        | 59 (21-155)                                          | 48 (17-125)                                      |
| Papua New Guinea             | 42 (16-99)                                                                                  | 35040 (13159-82973)                                           | 218 (82-516)                                                                        | 299 (87-1214)                                        | 242 (70-985)                                     |
| Paraguay                     | 42 (16-97)                                                                                  | 30115 (11473-68722)                                           | 220 (83-509)                                                                        | 157 (59-362)                                         | 127 (48-294)                                     |
| Peru                         | 32 (12-73)                                                                                  | 95220 (35890-220421)                                          | 165 (62-385)                                                                        | 501 (188-1179)                                       | 405 (152-960)                                    |
| Philippines                  | 84 (32-188)                                                                                 | 894417 (342176-2010519)                                       | 435 (166-985)                                                                       | 4644 (1775-10539)                                    | 3748 (1429-8541)                                 |
| Qatar                        | 48 (17-121)                                                                                 | 2687 (962-6733)                                               | 254 (90-635)                                                                        | 14 (5-36)                                            | 11 (4-29)                                        |
| Republic of Korea            | 42 (16-98)                                                                                  | 130133 (48651-307925)                                         | 218 (82-518)                                                                        | 753 (269-2517)                                       | 610 (218-2044)                                   |
| Rwanda                       | 38 (14-86)                                                                                  | 63638 (23937-144541)                                          | 191 (72-435)                                                                        | 3121 (1138-7446)                                     | 2522 (920-6039)                                  |
| Saint Kitts and Nevis        | 30 (11-71)                                                                                  | 139 (51-325)                                                  | 159 (59-376)                                                                        | 1 (0-2)                                              | 1 (0-1)                                          |
| Saint Lucia                  | 30 (11-71)                                                                                  | 482 (179-1130)                                                | 160 (59-376)                                                                        | 3 (1-6)                                              | 2 (1-5)                                          |
| Saint Vincent and Grenadines | 30 (11-71)                                                                                  | 334 (124-782)                                                 | 159 (59-376)                                                                        | 2 (1-4)                                              | 1 (1-3)                                          |
| Samoa                        | 42 (16-98)                                                                                  | 1064 (398-2510)                                               | 218 (82-516)                                                                        | 6 (2-21)                                             | 5 (2-17)                                         |
| Sao Tome and Principe        | 53 (21-117)                                                                                 | 1151 (445-2526)                                               | 271 (105-605)                                                                       | 32 (11-82)                                           | 26 (9-67)                                        |
| Saudi Arabia                 | 48 (17-121)                                                                                 | 135676 (48634-340249)                                         | 254 (90-634)                                                                        | 716 (254-1810)                                       | 579 (205-1466)                                   |
| Senegal                      | 45 (17-99)                                                                                  | 75203 (29188-167521)                                          | 231 (90-521)                                                                        | 497 (177-1388)                                       | 401 (142-1124)                                   |
| Seychelles                   | 45 (18-101)                                                                                 | 329 (127-732)                                                 | 236 (90-526)                                                                        | 2 (1-4)                                              | 1 (1-3)                                          |
| Sierra Leone                 | 62 (23-138)                                                                                 | 43404 (16453-96736)                                           | 320 (122-722)                                                                       | 297 (105-858)                                        | 240 (84-692)                                     |
| Solomon Islands              | 41 (16-98)                                                                                  | 2684 (1005-6347)                                              | 217 (82-515)                                                                        | 16 (6-51)                                            | 13 (5-41)                                        |
| Somalia                      | 92 (34-216)                                                                                 | 135230 (50096-317982)                                         | 477 (176-1134)                                                                      | 936 (320-2556)                                       | 756 (257-2074)                                   |

| Country                     | Incidence of severe pneumonia (per 1000 children per year) in children younger than 5 years | Episodes of severe pneumonia in children younger than 5 years | Incidence of severe pneumonia in HIV infected children (per 1000 children per year) | Episode of severe pneumonia in HIV infected children | Episodes of severe pneumonia attributable to HIV |
|-----------------------------|---------------------------------------------------------------------------------------------|---------------------------------------------------------------|-------------------------------------------------------------------------------------|------------------------------------------------------|--------------------------------------------------|
| South Africa                | 76 (29-173)                                                                                 | 365956 (139159-837157)                                        | 354 (134-814)                                                                       | 47044 (17592-110752)                                 | 37959 (14142-89811)                              |
| Sri Lanka                   | 38 (14-91)                                                                                  | 63237 (23527-151041)                                          | 199 (73-476)                                                                        | 330 (122-791)                                        | 267 (99-642)                                     |
| Sudan                       | 30 (11-73)                                                                                  | 144352 (52859-345775)                                         | 159 (58-382)                                                                        | 753 (274-1816)                                       | 608 (222-1474)                                   |
| Suriname                    | 31 (11-72)                                                                                  | 1536 (572-3616)                                               | 159 (59-375)                                                                        | 14 (4-43)                                            | 11 (4-35)                                        |
| Swaziland                   | 71 (27-157)                                                                                 | 11100 (4267-24572)                                            | 311 (120-695)                                                                       | 2150 (816-4848)                                      | 1735 (657-3932)                                  |
| Syrian Arab Republic        | 30 (11-73)                                                                                  | 73157 (26740-174955)                                          | 159 (58-383)                                                                        | 381 (139-919)                                        | 308 (112-745)                                    |
| Thailand                    | 33 (12-84)                                                                                  | 154295 (53731-392566)                                         | 172 (60-441)                                                                        | 914 (312-2395)                                       | 738 (252-1939)                                   |
| Timor-Leste                 | 52 (19-122)                                                                                 | 9126 (3367-21332)                                             | 271 (100-638)                                                                       | 47 (17-111)                                          | 38 (14-90)                                       |
| Togo                        | 82 (31-190)                                                                                 | 66210 (24740-152858)                                          | 409 (153-956)                                                                       | 3650 (1325-8930)                                     | 2951 (1070-7214)                                 |
| Tonga                       | 42 (16-98)                                                                                  | 552 (208-1306)                                                | 217 (82-516)                                                                        | 3 (1-11)                                             | 3 (1-9)                                          |
| Trinidad and Tobago         | 30 (11-72)                                                                                  | 2732 (1014-6431)                                              | 159 (59-377)                                                                        | 20 (7-62)                                            | 16 (5-50)                                        |
| Tunisia                     | 44 (15-113)                                                                                 | 36298 (12834-93728)                                           | 229 (81-594)                                                                        | 210 (72-726)                                         | 170 (58-589)                                     |
| Tuvalu                      | 42 (16-98)                                                                                  | 48 (18-113)                                                   | 218 (82-513)                                                                        | 0 (0-2)                                              | 0 (0-1)                                          |
| Uganda                      | 46 (18-102)                                                                                 | 221571 (85327-494800)                                         | 223 (85-499)                                                                        | 19158 (7250-44480)                                   | 15474 (5822-36205)                               |
| United Arab Emirates        | 48 (17-121)                                                                                 | 12549 (4494-31321)                                            | 254 (91-632)                                                                        | 66 (24-169)                                          | 54 (19-137)                                      |
| United Republic of Tanzania | 45 (18-100)                                                                                 | 266222 (103940-590127)                                        | 213 (83-474)                                                                        | 31257 (11764-72110)                                  | 25280 (9445-58483)                               |
| Uruguay                     | 30 (11-71)                                                                                  | 8243 (3055-19361)                                             | 159 (59-376)                                                                        | 44 (16-105)                                          | 35 (13-85)                                       |
| Vanuatu                     | 42 (16-98)                                                                                  | 1176 (441-2783)                                               | 218 (82-516)                                                                        | 7 (2-23)                                             | 6 (2-19)                                         |
| Venezuela                   | 30 (11-72)                                                                                  | 84760 (31395-199655)                                          | 160 (59-376)                                                                        | 479 (173-1280)                                       | 388 (140-1044)                                   |
| Viet Nam                    | 42 (16-98)                                                                                  | 295965 (111304-701490)                                        | 218 (82-514)                                                                        | 1767 (628-6283)                                      | 1432 (510-5087)                                  |
| Yemen                       | 30 (11-73)                                                                                  | 94880 (34734-227396)                                          | 159 (58-382)                                                                        | 495 (180-1190)                                       | 400 (146-965)                                    |
| Zambia                      | 70 (27-159)                                                                                 | 131366 (49971-296836)                                         | 319 (121-722)                                                                       | 21565 (8160-49867)                                   | 17407 (6567-40326)                               |

| Country  | Incidence of severe pneumonia (per 1000 children per year) in children younger than 5 years | Episodes of severe pneumonia in children younger than 5 years | Incidence of severe pneumonia in HIV infected children (per 1000 children per year) | Episode of severe pneumonia in HIV infected children | Episodes of severe pneumonia attributable to HIV |
|----------|---------------------------------------------------------------------------------------------|---------------------------------------------------------------|-------------------------------------------------------------------------------------|------------------------------------------------------|--------------------------------------------------|
| Zimbabwe | 54 (21-124)                                                                                 | 98414 (37284-223784)                                          | 225 (86-512)                                                                        | 25084 (9485-58220)                                   | 20268 (7639-47294)                               |

Supplementary table 6: Incidence and episodes of clinical pneumonia in children younger than 5 years in 2015

| Country                         | Incidence of clinical pneumonia (per 1000 children per year) in children younger than 5 years | Episodes of clinical pneumonia in children younger than 5 years | Incidence of clinical pneumonia in HIV infected children (per 1000 children per year) | Episode of clinical pneumonia in HIV infected children | Episodes of clinical pneumonia attributable to HIV |
|---------------------------------|-----------------------------------------------------------------------------------------------|-----------------------------------------------------------------|---------------------------------------------------------------------------------------|--------------------------------------------------------|----------------------------------------------------|
| <b>Afghanistan</b>              | 484 (268-895)                                                                                 | 2395405 (1324586-4432668)                                       | 2511 (1381-4691)                                                                      | 12433 (6837-23222)                                     | 10057 (5479-18792)                                 |
| <b>Algeria</b>                  | 226 (136-380)                                                                                 | 1039118 (623158-1742396)                                        | 1174 (698-1983)                                                                       | 5397 (3206-9149)                                       | 4364 (2582-7433)                                   |
| <b>Angola</b>                   | 158 (91-268)                                                                                  | 743818 (429795-1263384)                                         | 817 (465-1400)                                                                        | 13166 (3832-36205)                                     | 10679 (3099-29498)                                 |
| <b>Antigua and Barbuda</b>      | 127 (72-222)                                                                                  | 923 (521-1613)                                                  | 674 (373-1184)                                                                        | 5 (3-9)                                                | 4 (2-7)                                            |
| <b>Argentina</b>                | 127 (72-221)                                                                                  | 471297 (266785-823452)                                          | 673 (375-1180)                                                                        | 2503 (1394-4388)                                       | 2034 (1121-3590)                                   |
| <b>Bahamas</b>                  | 127 (72-221)                                                                                  | 3695 (2090-6448)                                                | 673 (375-1183)                                                                        | 25 (13-55)                                             | 20 (10-45)                                         |
| <b>Bahrain</b>                  | 148 (74-293)                                                                                  | 16058 (8047-31892)                                              | 782 (389-1559)                                                                        | 85 (42-170)                                            | 69 (34-139)                                        |
| <b>Bangladesh</b>               | 277 (163-470)                                                                                 | 4241015 (2498910-7206086)                                       | 1436 (835-2457)                                                                       | 22026 (12808-37702)                                    | 17808 (10269-30642)                                |
| <b>Barbados</b>                 | 127 (72-222)                                                                                  | 2201 (1242-3846)                                                | 674 (375-1184)                                                                        | 12 (7-21)                                              | 9 (5-17)                                           |
| <b>Belize</b>                   | 167 (99-279)                                                                                  | 6592 (3916-11003)                                               | 871 (513-1475)                                                                        | 59 (28-124)                                            | 47 (22-100)                                        |
| <b>Benin</b>                    | 306 (185-509)                                                                                 | 522886 (316293-869280)                                          | 1585 (951-2670)                                                                       | 4724 (2412-9162)                                       | 3819 (1935-7430)                                   |
| <b>Bhutan</b>                   | 175 (102-301)                                                                                 | 11542 (6700-19839)                                              | 920 (526-1592)                                                                        | 62 (35-111)                                            | 50 (28-91)                                         |
| <b>Bolivia</b>                  | 123 (69-216)                                                                                  | 146047 (81595-255661)                                           | 652 (360-1149)                                                                        | 773 (427-1367)                                         | 628 (344-1113)                                     |
| <b>Botswana</b>                 | 249 (152-414)                                                                                 | 66395 (40437-110219)                                            | 1250 (752-2070)                                                                       | 3240 (1845-5684)                                       | 2618 (1483-4621)                                   |
| <b>Brazil</b>                   | 167 (99-279)                                                                                  | 2503090 (1487643-4186797)                                       | 871 (511-1477)                                                                        | 13096 (7683-22216)                                     | 10594 (6166-18103)                                 |
| <b>Burkina Faso</b>             | 275 (162-476)                                                                                 | 865732 (509393-1496970)                                         | 1426 (827-2485)                                                                       | 7281 (3658-14423)                                      | 5881 (2937-11693)                                  |
| <b>Burundi</b>                  | 231 (138-391)                                                                                 | 476026 (283527-805224)                                          | 1190 (696-2027)                                                                       | 7429 (3645-14528)                                      | 6002 (2936-11779)                                  |
| <b>Cambodia</b>                 | 255 (154-423)                                                                                 | 451360 (273618-749415)                                          | 1326 (789-2218)                                                                       | 2640 (1504-5513)                                       | 2134 (1204-4472)                                   |
| <b>Cameroon</b>                 | 239 (143-400)                                                                                 | 893933 (535403-1496571)                                         | 1201 (709-2017)                                                                       | 41921 (23804-72909)                                    | 33831 (19088-59196)                                |
| <b>Cape Verde</b>               | 221 (134-367)                                                                                 | 11857 (7182-19658)                                              | 1150 (688-1908)                                                                       | 68 (39-147)                                            | 55 (31-120)                                        |
| <b>Central African Republic</b> | 227 (137-376)                                                                                 | 160590 (97009-265981)                                           | 1150 (685-1909)                                                                       | 5816 (3152-10619)                                      | 4701 (2535-8625)                                   |

|                                     |               |                            |                 |                      |                     |
|-------------------------------------|---------------|----------------------------|-----------------|----------------------|---------------------|
| <b>Chad</b>                         | 239 (129-437) | 628909 (340011-1151351)    | 1223 (651-2260) | 15758 (7397-32953)   | 12733 (5962-26735)  |
| <b>Chile</b>                        | 127 (72-221)  | 148432 (84084-258693)      | 673 (374-1182)  | 788 (438-1383)       | 640 (353-1129)      |
| <b>China</b>                        | 84 (40-166)   | 7024251 (3315052-13791976) | 469 (217-929)   | 39027 (18022-77290)  | 32001 (14717-63656) |
| <b>Colombia</b>                     | 125 (70-218)  | 466206 (262860-815495)     | 662 (367-1164)  | 2478 (1372-4379)     | 2013 (1107-3568)    |
| <b>Comoros</b>                      | 301 (174-532) | 35902 (20744-63517)        | 1561 (895-2772) | 189 (108-368)        | 153 (87-297)        |
| <b>Congo</b>                        | 225 (136-372) | 170980 (103225-282490)     | 1150 (689-1903) | 4536 (2407-8457)     | 3665 (1937-6844)    |
| <b>Cook Islands</b>                 | 285 (172-476) | 599 (362-1000)             | 1482 (888-2494) | 3 (2-5)              | 3 (1-4)             |
| <b>Costa Rica</b>                   | 133 (69-246)  | 46614 (24287-86255)        | 710 (363-1320)  | 249 (127-463)        | 202 (103-378)       |
| <b>Cote d'Ivoire</b>                | 129 (73-226)  | 474218 (268115-827879)     | 673 (375-1183)  | 13820 (7140-26134)   | 11231 (5762-21334)  |
| <b>Dem. Peoples's Rep. of Korea</b> | 148 (74-293)  | 257929 (129840-512812)     | 782 (390-1561)  | 1367 (681-2728)      | 1109 (551-2228)     |
| <b>Dem. Rep. of the Congo</b>       | 278 (163-471) | 3854542 (2262964-6539301)  | 1437 (836-2459) | 37763 (17560-79648)  | 30511 (14111-64499) |
| <b>Djibouti</b>                     | 195 (117-325) | 19864 (11912-33180)        | 1008 (599-1698) | 334 (177-617)        | 270 (142-502)       |
| <b>Dominica</b>                     | 127 (72-222)  | 773 (437-1350)             | 673 (374-1183)  | 4 (2-7)              | 3 (2-6)             |
| <b>Dominican Republic</b>           | 145 (79-264)  | 154361 (83906-280276)      | 770 (413-1410)  | 876 (454-2053)       | 711 (367-1670)      |
| <b>Ecuador</b>                      | 127 (72-221)  | 204113 (115402-356669)     | 673 (374-1186)  | 1085 (602-1910)      | 881 (485-1556)      |
| <b>Egypt</b>                        | 117 (64-209)  | 1414776 (775148-2537521)   | 627 (340-1132)  | 7602 (4114-13721)    | 6190 (3337-11234)   |
| <b>El Salvador</b>                  | 166 (99-278)  | 86519 (51377-144434)       | 870 (511-1475)  | 467 (271-872)        | 378 (219-707)       |
| <b>Equatorial Guinea</b>            | 233 (140-391) | 29912 (18006-50161)        | 1174 (700-1984) | 1271 (705-2269)      | 1028 (567-1844)     |
| <b>Eritrea</b>                      | 241 (146-400) | 196014 (119180-326040)     | 1252 (751-2078) | 1126 (643-2341)      | 911 (517-1904)      |
| <b>Ethiopia</b>                     | 242 (147-402) | 3539917 (2152704-5874567)  | 1252 (750-2078) | 52893 (26480-101945) | 42744 (21303-82705) |
| <b>Fiji</b>                         | 162 (89-291)  | 14265 (7845-25647)         | 850 (462-1542)  | 75 (41-136)          | 61 (33-111)         |
| <b>Gabon</b>                        | 248 (142-433) | 59385 (34058-103632)       | 1265 (718-2232) | 1779 (896-3442)      | 1438 (718-2788)     |
| <b>Gambia</b>                       | 242 (147-400) | 88597 (53835-146466)       | 1250 (748-2080) | 905 (427-1864)       | 731 (344-1508)      |
| <b>Ghana</b>                        | 190 (114-315) | 770760 (463959-1277691)    | 984 (584-1648)  | 11014 (4178-25716)   | 8906 (3364-20908)   |
| <b>Grenada</b>                      | 127 (72-222)  | 1260 (710-2201)            | 674 (373-1185)  | 7 (4-12)             | 5 (3-10)            |
| <b>Guatemala</b>                    | 167 (99-278)  | 348076 (206639-580886)     | 871 (511-1476)  | 1926 (1111-3784)     | 1561 (894-3067)     |
| <b>Guinea</b>                       | 244 (145-413) | 499544 (296745-844625)     | 1258 (738-2144) | 7226 (3469-14462)    | 5832 (2795-11750)   |
| <b>Guinea-Bissau</b>                | 248 (151-411) | 71594 (43475-118794)       | 1251 (748-2077) | 2958 (1660-5232)     | 2387 (1336-4250)    |

|                                    |               |                              |                  |                        |                        |
|------------------------------------|---------------|------------------------------|------------------|------------------------|------------------------|
| <b>Guyana</b>                      | 228 (136-385) | 15322 (9100-25866)           | 1184 (695-2018)  | 140 (58-406)           | 113 (47-330)           |
| <b>Haiti</b>                       | 226 (133-383) | 279997 (164390-473784)       | 1167 (674-1995)  | 4065 (1935-8206)       | 3286 (1553-6657)       |
| <b>Honduras</b>                    | 166 (98-281)  | 135049 (79884-229016)        | 862 (501-1483)   | 714 (414-1268)         | 577 (332-1029)         |
| <b>India</b>                       | 352 (206-611) | 43567384 (25429504-75589014) | 1830 (1057-3182) | 226344 (130818-393623) | 182810 (105223-319849) |
| <b>Indonesia</b>                   | 326 (196-545) | 8106927 (4884066-13560739)   | 1697 (1015-2870) | 42504 (25297-72719)    | 34362 (20296-59071)    |
| <b>Iran (Islamic Republic of)</b>  | 148 (74-293)  | 1013570 (507690-2010985)     | 782 (391-1563)   | 5367 (2680-10716)      | 4354 (2162-8720)       |
| <b>Iraq</b>                        | 193 (115-321) | 1104387 (660330-1839203)     | 1007 (599-1699)  | 5768 (3432-9731)       | 4668 (2751-7913)       |
| <b>Jamaica</b>                     | 127 (72-221)  | 25874 (14613-45104)          | 673 (374-1183)   | 167 (86-363)           | 135 (69-295)           |
| <b>Jordan</b>                      | 148 (74-294)  | 144730 (72863-287787)        | 782 (390-1561)   | 767 (383-1530)         | 622 (310-1248)         |
| <b>Kenya</b>                       | 234 (140-391) | 1679839 (1004783-2800621)    | 1187 (699-1997)  | 60951 (32562-111733)   | 49262 (26239-90882)    |
| <b>Kiribati</b>                    | 163 (91-285)  | 2399 (1350-4210)             | 855 (474-1505)   | 13 (7-22)              | 10 (6-18)              |
| <b>Kuwait</b>                      | 148 (74-293)  | 51420 (25781-102028)         | 782 (389-1561)   | 272 (135-543)          | 221 (109-442)          |
| <b>Lao People's Dem. Republic</b>  | 362 (205-638) | 303412 (172077-534900)       | 1876 (1051-3314) | 1578 (885-2826)        | 1275 (711-2283)        |
| <b>Lebanon</b>                     | 148 (74-294)  | 68089 (34236-135376)         | 782 (390-1562)   | 361 (180-720)          | 293 (145-586)          |
| <b>Lesotho</b>                     | 262 (158-438) | 73010 (44022-122030)         | 1151 (687-1926)  | 14278 (8389-24441)     | 11532 (6735-19853)     |
| <b>Liberia</b>                     | 206 (117-353) | 144612 (82091-247522)        | 1068 (599-1842)  | 1527 (682-3258)        | 1234 (548-2636)        |
| <b>Libyan Arab Jamahiriya</b>      | 148 (74-294)  | 95809 (48082-190747)         | 782 (391-1564)   | 508 (254-1015)         | 412 (205-826)          |
| <b>Madagascar</b>                  | 194 (116-326) | 729961 (435981-1228874)      | 1007 (592-1705)  | 3950 (2285-7288)       | 3194 (1836-5923)       |
| <b>Malawi</b>                      | 221 (132-375) | 653748 (390018-1106792)      | 1078 (635-1838)  | 53271 (31140-92137)    | 43037 (25002-74811)    |
| <b>Malaysia</b>                    | 159 (87-286)  | 393096 (216260-708730)       | 842 (456-1528)   | 2088 (1128-3791)       | 1697 (913-3087)        |
| <b>Maldives</b>                    | 168 (96-290)  | 6289 (3596-10841)            | 892 (504-1550)   | 33 (19-58)             | 27 (15-47)             |
| <b>Mali</b>                        | 293 (176-494) | 958538 (574186-1614397)      | 1517 (896-2574)  | 8167 (3968-16735)      | 6604 (3185-13584)      |
| <b>Marshall Islands</b>            | 237 (131-433) | 1191 (657-2176)              | 1235 (673-2288)  | 6 (3-12)               | 5 (3-9)                |
| <b>Mauritania</b>                  | 221 (133-367) | 132968 (80109-220504)        | 1150 (684-1913)  | 718 (420-1388)         | 580 (337-1122)         |
| <b>Mauritius</b>                   | 226 (136-380) | 15989 (9636-26812)           | 1175 (699-1978)  | 83 (49-142)            | 67 (40-115)            |
| <b>Mexico</b>                      | 127 (72-222)  | 1472309 (832716-2574787)     | 674 (374-1182)   | 7826 (4350-13744)      | 6352 (3503-11245)      |
| <b>Micronesia (Fed. States of)</b> | 224 (126-408) | 2597 (1463-4720)             | 1168 (648-2130)  | 14 (7-25)              | 11 (6-20)              |

|                                     |               |                            |                 |                        |                        |
|-------------------------------------|---------------|----------------------------|-----------------|------------------------|------------------------|
| <b>Mongolia</b>                     | 131 (68-240)  | 44238 (23139-81220)        | 685 (353-1268)  | 232 (120-429)          | 187 (96-349)           |
| <b>Morocco</b>                      | 193 (116-321) | 659275 (396184-1098142)    | 1007 (599-1697) | 3446 (2048-5806)       | 2788 (1647-4718)       |
| <b>Mozambique</b>                   | 276 (166-462) | 1328171 (801551-2227055)   | 1348 (805-2270) | 100838 (58812-174572)  | 81485 (47150-141734)   |
| <b>Myanmar</b>                      | 286 (162-502) | 1305054 (740564-2290541)   | 1481 (830-2620) | 7599 (4056-16404)      | 6137 (3263-13245)      |
| <b>Namibia</b>                      | 245 (147-414) | 82857 (49778-139972)       | 1179 (700-2018) | 7910 (4498-14055)      | 6397 (3619-11439)      |
| <b>Nauru</b>                        | 142 (69-300)  | 136 (66-288)               | 758 (367-1595)  | 1 (0-2)                | 1 (0-2)                |
| <b>Nepal</b>                        | 259 (153-436) | 725981 (429986-1225106)    | 1343 (782-2296) | 3805 (2218-6805)       | 3075 (1782-5520)       |
| <b>Nicaragua</b>                    | 166 (99-278)  | 100819 (59931-168516)      | 871 (511-1478)  | 527 (309-896)          | 427 (249-730)          |
| <b>Niger</b>                        | 300 (173-521) | 1243350 (715895-2157346)   | 1554 (885-2723) | 6496 (3693-11453)      | 5248 (2965-9318)       |
| <b>Nigeria</b>                      | 302 (160-538) | 9401585 (4984868-16747235) | 1541 (805-2760) | 266475 (135793-483365) | 215309 (109239-391682) |
| <b>Niue</b>                         | 158 (88-284)  | 22 (12-39)                 | 819 (444-1476)  | 1 (0-2)                | 1 (0-1)                |
| <b>Oman</b>                         | 148 (74-293)  | 56952 (28579-112875)       | 781 (390-1558)  | 301 (150-600)          | 244 (122-490)          |
| <b>Pakistan</b>                     | 289 (170-488) | 7120514 (4202740-12028777) | 1497 (880-2556) | 36929 (21693-63041)    | 29834 (17428-51048)    |
| <b>Palau</b>                        | 169 (94-299)  | 337 (188-598)              | 888 (492-1589)  | 2 (1-3)                | 1 (1-3)                |
| <b>Panama</b>                       | 127 (72-221)  | 46697 (26361-81559)        | 674 (374-1181)  | 250 (139-449)          | 203 (111-367)          |
| <b>Papua New Guinea</b>             | 213 (127-361) | 212031 (126127-359379)     | 1108 (653-1899) | 1723 (828-3730)        | 1392 (666-3024)        |
| <b>Paraguay</b>                     | 167 (99-279)  | 112274 (66675-187900)      | 871 (510-1476)  | 588 (344-1008)         | 475 (277-817)          |
| <b>Peru</b>                         | 127 (72-219)  | 382408 (218525-661697)     | 670 (375-1177)  | 2025 (1133-3563)       | 1643 (912-2892)        |
| <b>Philippines</b>                  | 288 (168-517) | 3244633 (1893117-5822399)  | 1500 (860-2691) | 16888 (9684-30294)     | 13646 (7779-24537)     |
| <b>Qatar</b>                        | 148 (74-293)  | 19550 (9826-38823)         | 782 (390-1560)  | 104 (52-206)           | 84 (42-169)            |
| <b>Republic of Korea</b>            | 137 (73-251)  | 312376 (167220-573186)     | 728 (382-1341)  | 1666 (875-3071)        | 1356 (701-2514)        |
| <b>Rwanda</b>                       | 154 (90-264)  | 261327 (152141-447199)     | 799 (458-1381)  | 2730 (1254-5704)       | 2207 (1011-4630)       |
| <b>Saint Kitts and Nevis</b>        | 127 (72-221)  | 581 (329-1014)             | 673 (376-1184)  | 3 (2-5)                | 3 (1-4)                |
| <b>Saint Lucia</b>                  | 127 (72-221)  | 1745 (986-3045)            | 673 (373-1181)  | 9 (5-16)               | 8 (4-13)               |
| <b>Saint Vincent and Grenadines</b> | 127 (71-222)  | 1080 (606-1887)            | 674 (374-1184)  | 6 (3-10)               | 5 (3-8)                |
| <b>Samoa</b>                        | 153 (80-282)  | 3693 (1933-6808)           | 800 (414-1493)  | 19 (10-36)             | 16 (8-29)              |

|                                    |               |                           |                  |                      |                      |
|------------------------------------|---------------|---------------------------|------------------|----------------------|----------------------|
| <b>Sao Tome and Principe</b>       | 206 (124-345) | 6098 (3663-10215)         | 1054 (625-1773)  | 137 (51-315)         | 111 (41-257)         |
| <b>Saudi Arabia</b>                | 148 (74-294)  | 466829 (234362-928317)    | 782 (390-1560)   | 2473 (1234-4931)     | 2007 (995-4021)      |
| <b>Senegal</b>                     | 251 (150-423) | 652553 (390649-1101261)   | 1303 (771-2225)  | 3636 (2093-7533)     | 2940 (1680-6112)     |
| <b>Seychelles</b>                  | 226 (136-380) | 1897 (1143-3184)          | 1175 (699-1983)  | 10 (6-17)            | 8 (5-14)             |
| <b>Sierra Leone</b>                | 239 (142-400) | 239822 (142572-401208)    | 1234 (725-2078)  | 2682 (1358-5221)     | 2166 (1092-4221)     |
| <b>Solomon Islands</b>             | 185 (107-323) | 15154 (8768-26425)        | 962 (551-1690)   | 79 (45-138)          | 64 (36-112)          |
| <b>Somalia</b>                     | 464 (258-834) | 914247 (507717-1643265)   | 2403 (1318-4358) | 5717 (2881-12516)    | 4623 (2315-10166)    |
| <b>South Africa</b>                | 233 (141-387) | 1252624 (757150-2077824)  | 1150 (687-1910)  | 86427 (49393-151936) | 69776 (39616-123689) |
| <b>Sri Lanka</b>                   | 193 (111-340) | 316629 (182203-559399)    | 1007 (575-1789)  | 1654 (945-2939)      | 1336 (757-2388)      |
| <b>Sudan</b>                       | 193 (116-320) | 1146911 (688367-1907236)  | 1008 (599-1695)  | 6018 (3575-10205)    | 4871 (2870-8299)     |
| <b>Suriname</b>                    | 127 (72-221)  | 6107 (3451-10658)         | 674 (374-1180)   | 33 (18-59)           | 27 (15-49)           |
| <b>Swaziland</b>                   | 176 (101-307) | 30585 (17556-53261)       | 804 (453-1410)   | 4871 (2643-8850)     | 3939 (2122-7186)     |
| <b>Syrian Arab Republic</b>        | 148 (74-294)  | 323640 (162375-643845)    | 782 (389-1560)   | 1714 (853-3419)      | 1391 (691-2785)      |
| <b>Thailand</b>                    | 167 (88-312)  | 635279 (333865-1186013)   | 873 (452-1644)   | 3317 (1717-6247)     | 2682 (1385-5060)     |
| <b>Timor-Leste</b>                 | 266 (142-478) | 54259 (28914-97422)       | 1383 (731-2494)  | 282 (149-508)        | 228 (120-412)        |
| <b>Togo</b>                        | 245 (148-406) | 283704 (172031-471354)    | 1251 (748-2081)  | 7112 (3826-13055)    | 5749 (3072-10587)    |
| <b>Tonga</b>                       | 149 (80-267)  | 1918 (1029-3443)          | 784 (414-1411)   | 10 (5-18)            | 8 (4-15)             |
| <b>Trinidad and Tobago</b>         | 127 (72-221)  | 12185 (6888-21254)        | 673 (374-1181)   | 72 (39-153)          | 59 (31-125)          |
| <b>Tunisia</b>                     | 148 (74-293)  | 145095 (72832-288135)     | 782 (389-1557)   | 768 (382-1529)       | 623 (310-1247)       |
| <b>Tuvalu</b>                      | 132 (66-252)  | 133 (67-253)              | 698 (343-1341)   | 1 (0-2)              | 1 (0-2)              |
| <b>Uganda</b>                      | 232 (141-384) | 1687729 (1024842-2795560) | 1158 (694-1931)  | 91625 (51799-159997) | 74024 (41628-129982) |
| <b>United Arab Emirates</b>        | 148 (74-293)  | 72595 (36473-144187)      | 782 (390-1563)   | 384 (192-768)        | 312 (155-625)        |
| <b>United Republic of Tanzania</b> | 255 (153-426) | 2397937 (1437770-4003238) | 1291 (764-2169)  | 86882 (47941-155753) | 70117 (38591-126297) |
| <b>Uruguay</b>                     | 127 (72-221)  | 30533 (17238-53327)       | 674 (375-1185)   | 162 (90-286)         | 132 (72-234)         |
| <b>Vanuatu</b>                     | 233 (132-411) | 8091 (4574-14278)         | 1207 (675-2145)  | 42 (23-75)           | 34 (19-61)           |
| <b>Venezuela</b>                   | 127 (72-221)  | 375058 (212331-654559)    | 674 (373-1184)   | 2005 (1109-3581)     | 1629 (895-2925)      |
| <b>Viet Nam</b>                    | 240 (133-427) | 1859015 (1025819-3304844) | 1248 (679-2247)  | 9716 (5272-17648)    | 7855 (4232-14345)    |
| <b>Yemen</b>                       | 193 (116-321) | 756698 (455188-1261711)   | 1007 (599-1697)  | 3952 (2352-6658)     | 3197 (1891-5418)     |



|                 |               |                         |                 |                      |                      |
|-----------------|---------------|-------------------------|-----------------|----------------------|----------------------|
| <b>Zambia</b>   | 289 (173-490) | 824264 (491788-1396281) | 1395 (818-2382) | 78276 (44604-137539) | 63280 (35816-111346) |
| <b>Zimbabwe</b> | 242 (145-407) | 606343 (364290-1018681) | 1157 (686-1953) | 62790 (36284-109647) | 50731 (29080-89295)  |

Supplementary table 7: Incidence and episodes of severe pneumonia in children younger than 5 years in 2015

| Country                    | Incidence of severe pneumonia (per 1000 children per year) in children younger than 5 years | Episodes of severe pneumonia in children younger than 5 years | Incidence of severe pneumonia in HIV infected children (per 1000 children per year) | Episode of severe pneumonia in HIV infected children | Episodes of severe pneumonia attributable to HIV |
|----------------------------|---------------------------------------------------------------------------------------------|---------------------------------------------------------------|-------------------------------------------------------------------------------------|------------------------------------------------------|--------------------------------------------------|
| <b>Afghanistan</b>         | 78 (29-188)                                                                                 | 384260 (142964-928264)                                        | 404 (149-981)                                                                       | 2001 (737-4856)                                      | 1617 (595-3939)                                  |
| <b>Algeria</b>             | 36 (14-80)                                                                                  | 166754 (64459-368296)                                         | 189 (73-422)                                                                        | 868 (335-1945)                                       | 700 (270-1583)                                   |
| <b>Angola</b>              | 25 (10-58)                                                                                  | 118577 (45455-271754)                                         | 130 (50-301)                                                                        | 2074 (499-7252)                                      | 1682 (404-5896)                                  |
| <b>Antigua and Barbuda</b> | 20 (8-47)                                                                                   | 147 (56-342)                                                  | 108 (40-253)                                                                        | 1 (0-2)                                              | 1 (0-2)                                          |
| <b>Argentina</b>           | 20 (8-47)                                                                                   | 75398 (28340-175130)                                          | 108 (40-253)                                                                        | 400 (149-940)                                        | 325 (121-768)                                    |
| <b>Bahamas</b>             | 20 (8-47)                                                                                   | 591 (222-1371)                                                | 108 (40-253)                                                                        | 4 (1-11)                                             | 3 (1-9)                                          |
| <b>Bahrain</b>             | 24 (8-60)                                                                                   | 2560 (904-6523)                                               | 124 (44-319)                                                                        | 14 (5-35)                                            | 11 (4-28)                                        |
| <b>Bangladesh</b>          | 44 (17-99)                                                                                  | 677348 (259359-1518390)                                       | 230 (87-519)                                                                        | 3524 (1337-7958)                                     | 2849 (1078-6470)                                 |
| <b>Barbados</b>            | 20 (8-47)                                                                                   | 352 (132-818)                                                 | 108 (40-253)                                                                        | 2 (1-4)                                              | 2 (1-4)                                          |
| <b>Belize</b>              | 27 (10-60)                                                                                  | 1054 (408-2359)                                               | 139 (53-314)                                                                        | 9 (3-25)                                             | 8 (3-20)                                         |
| <b>Benin</b>               | 49 (19-108)                                                                                 | 83873 (32569-184835)                                          | 254 (99-567)                                                                        | 756 (267-1895)                                       | 610 (215-1538)                                   |
| <b>Bhutan</b>              | 28 (11-64)                                                                                  | 1857 (702-4236)                                               | 148 (56-340)                                                                        | 10 (4-23)                                            | 8 (3-19)                                         |
| <b>Bolivia</b>             | 20 (7-46)                                                                                   | 23375 (8781-54582)                                            | 104 (39-246)                                                                        | 124 (46-293)                                         | 101 (37-237)                                     |
| <b>Botswana</b>            | 40 (16-88)                                                                                  | 10647 (4141-23540)                                            | 201 (78-445)                                                                        | 519 (196-1198)                                       | 419 (158-967)                                    |
| <b>Brazil</b>              | 27 (10-60)                                                                                  | 399901 (155019-897109)                                        | 139 (53-315)                                                                        | 2092 (803-4743)                                      | 1693 (649-3849)                                  |
| <b>Burkina Faso</b>        | 44 (17-100)                                                                                 | 138710 (52841-313146)                                         | 228 (87-519)                                                                        | 1170 (410-2987)                                      | 946 (330-2421)                                   |
| <b>Burundi</b>             | 37 (14-83)                                                                                  | 76281 (29252-171157)                                          | 190 (73-430)                                                                        | 1180 (413-3002)                                      | 954 (334-2436)                                   |
| <b>Cambodia</b>            | 41 (16-90)                                                                                  | 72438 (27985-159135)                                          | 213 (82-470)                                                                        | 431 (159-1132)                                       | 348 (129-917)                                    |
| <b>Cameroon</b>            | 38 (15-86)                                                                                  | 143164 (55211-320223)                                         | 192 (74-433)                                                                        | 6737 (2513-15570)                                    | 5442 (2025-12593)                                |
| <b>Cape Verde</b>          | 35 (14-79)                                                                                  | 1898 (738-4227)                                               | 184 (71-409)                                                                        | 11 (4-29)                                            | 9 (3-24)                                         |

|                                     |             |                          |              |                   |                   |
|-------------------------------------|-------------|--------------------------|--------------|-------------------|-------------------|
| <b>Central African Republic</b>     | 36 (14-81)  | 25731 (9994-57065)       | 184 (71-410) | 927 (345-2209)    | 750 (279-1798)    |
| <b>Chad</b>                         | 38 (14-92)  | 100662 (37096-241302)    | 196 (72-472) | 2513 (848-6650)   | 2033 (684-5414)   |
| <b>Chile</b>                        | 20 (8-47)   | 23699 (8933-55168)       | 108 (40-253) | 126 (47-296)      | 103 (38-242)      |
| <b>China</b>                        | 14 (5-34)   | 1123550 (376390-2866461) | 75 (25-193)  | 6249 (2067-16036) | 5125 (1690-13244) |
| <b>Colombia</b>                     | 20 (7-46)   | 74528 (28018-173341)     | 106 (40-249) | 397 (148-935)     | 322 (120-762)     |
| <b>Comoros</b>                      | 48 (18-111) | 5780 (2205-13249)        | 251 (96-583) | 30 (12-73)        | 25 (9-59)         |
| <b>Congo</b>                        | 36 (14-80)  | 27333 (10604-60758)      | 184 (71-410) | 725 (259-1770)    | 587 (210-1438)    |
| <b>Cook Islands</b>                 | 46 (18-101) | 96 (37-212)              | 238 (93-532) | 1 (0-1)           | 0 (0-1)           |
| <b>Costa Rica</b>                   | 21 (8-52)   | 7484 (2647-18132)        | 114 (40-279) | 40 (14-98)        | 32 (11-80)        |
| <b>Cote d'Ivoire</b>                | 21 (8-48)   | 75899 (28583-176202)     | 108 (40-253) | 2202 (797-5534)   | 1790 (644-4510)   |
| <b>Dem. Peoples's Rep. of Korea</b> | 24 (8-60)   | 41143 (14489-104759)     | 125 (44-321) | 218 (77-560)      | 177 (62-456)      |
| <b>Dem. Rep. of the Congo</b>       | 44 (17-100) | 615657 (235185-1384938)  | 230 (87-521) | 6040 (2039-16057) | 4879 (1649-13003) |
| <b>Djibouti</b>                     | 31 (12-70)  | 3188 (1237-7108)         | 162 (63-364) | 53 (19-131)       | 43 (16-106)       |
| <b>Dominica</b>                     | 20 (8-47)   | 124 (46-287)             | 108 (40-253) | 1 (0-2)           | 1 (0-1)           |
| <b>Dominican Republic</b>           | 23 (9-56)   | 24649 (9114-59129)       | 123 (45-296) | 142 (50-390)      | 115 (41-318)      |
| <b>Ecuador</b>                      | 20 (8-47)   | 32665 (12310-75813)      | 108 (40-253) | 173 (65-407)      | 141 (53-332)      |
| <b>Egypt</b>                        | 19 (7-44)   | 226501 (84820-538621)    | 100 (37-241) | 1217 (448-2920)   | 990 (365-2393)    |
| <b>El Salvador</b>                  | 27 (10-60)  | 13845 (5372-31005)       | 139 (53-314) | 75 (29-179)       | 61 (23-146)       |
| <b>Equatorial Guinea</b>            | 37 (14-83)  | 4806 (1853-10647)        | 189 (73-424) | 204 (77-477)      | 165 (62-388)      |
| <b>Eritrea</b>                      | 39 (15-85)  | 31388 (12172-69506)      | 201 (78-445) | 184 (69-459)      | 148 (55-373)      |
| <b>Ethiopia</b>                     | 39 (15-86)  | 567035 (220985-1255877)  | 201 (78-445) | 8365 (2929-20798) | 6768 (2360-16901) |
| <b>Fiji</b>                         | 26 (10-61)  | 2295 (848-5351)          | 136 (51-325) | 12 (4-29)         | 10 (4-23)         |
| <b>Gabon</b>                        | 40 (15-92)  | 9533 (3611-21972)        | 203 (77-470) | 284 (100-700)     | 230 (81-568)      |
| <b>Gambia</b>                       | 39 (15-86)  | 14165 (5527-31333)       | 200 (78-445) | 144 (49-381)      | 117 (39-310)      |
| <b>Ghana</b>                        | 30 (12-68)  | 123352 (47930-274980)    | 157 (61-352) | 1752 (501-5214)   | 1416 (405-4213)   |
| <b>Grenada</b>                      | 20 (8-47)   | 202 (76-468)             | 108 (40-253) | 1 (0-3)           | 1 (0-2)           |
| <b>Guatemala</b>                    | 27 (10-60)  | 55726 (21549-124796)     | 139 (53-314) | 312 (118-769)     | 253 (95-625)      |
| <b>Guinea</b>                       | 39 (15-88)  | 79935 (30790-180036)     | 202 (78-456) | 1159 (390-3009)   | 938 (314-2437)    |

|                                   |             |                            |               |                     |                     |
|-----------------------------------|-------------|----------------------------|---------------|---------------------|---------------------|
| <b>Guinea-Bissau</b>              | 40 (15-88)  | 11468 (4471-25345)         | 200 (78-446)  | 474 (177-1108)      | 383 (143-899)       |
| <b>Guyana</b>                     | 37 (14-82)  | 2464 (946-5528)            | 190 (73-431)  | 22 (7-80)           | 18 (5-65)           |
| <b>Haiti</b>                      | 36 (14-82)  | 44982 (17204-101564)       | 188 (72-426)  | 648 (218-1688)      | 524 (176-1375)      |
| <b>Honduras</b>                   | 26 (10-60)  | 21593 (8295-48728)         | 138 (53-313)  | 115 (44-264)        | 93 (35-214)         |
| <b>India</b>                      | 57 (22-127) | 6993653 (2661243-15765551) | 293 (111-671) | 36296 (13779-83009) | 29328 (11098-67412) |
| <b>Indonesia</b>                  | 52 (20-115) | 1301069 (498847-2869919)   | 272 (105-607) | 6809 (2618-15351)   | 5505 (2104-12469)   |
| <b>Iran (Islamic Republic of)</b> | 24 (8-60)   | 161453 (56768-410399)      | 125 (44-320)  | 855 (302-2195)      | 694 (245-1786)      |
| <b>Iraq</b>                       | 31 (12-69)  | 177196 (68967-395165)      | 162 (63-362)  | 926 (359-2075)      | 749 (290-1689)      |
| <b>Jamaica</b>                    | 20 (8-47)   | 4139 (1556-9591)           | 108 (40-252)  | 27 (9-73)           | 22 (8-60)           |
| <b>Jordan</b>                     | 24 (8-60)   | 23102 (8124-58962)         | 124 (44-320)  | 122 (43-314)        | 99 (35-256)         |
| <b>Kenya</b>                      | 38 (15-84)  | 269243 (104272-600469)     | 191 (74-429)  | 9755 (3599-23550)   | 7889 (2899-19073)   |
| <b>Kiribati</b>                   | 26 (10-61)  | 385 (143-895)              | 137 (51-322)  | 2 (1-5)             | 2 (1-4)             |
| <b>Kuwait</b>                     | 24 (8-60)   | 8193 (2874-20821)          | 125 (44-319)  | 43 (15-111)         | 35 (12-90)          |
| <b>Lao People's Dem. Republic</b> | 58 (22-134) | 48715 (18218-112476)       | 302 (112-708) | 254 (94-598)        | 205 (76-486)        |
| <b>Lebanon</b>                    | 24 (8-60)   | 10859 (3826-27682)         | 125 (44-320)  | 57 (20-148)         | 47 (16-120)         |
| <b>Lesotho</b>                    | 42 (16-93)  | 11717 (4549-26007)         | 185 (71-412)  | 2289 (873-5157)     | 1851 (704-4184)     |
| <b>Liberia</b>                    | 33 (12-75)  | 23094 (8762-52581)         | 170 (64-392)  | 243 (80-662)        | 196 (64-536)        |
| <b>Libyan Arab Jamahiriya</b>     | 24 (8-60)   | 15280 (5372-38936)         | 125 (44-320)  | 81 (29-207)         | 66 (23-169)         |
| <b>Madagascar</b>                 | 31 (12-69)  | 116583 (44986-261906)      | 161 (62-363)  | 635 (240-1490)      | 514 (193-1211)      |
| <b>Malawi</b>                     | 35 (14-79)  | 104755 (40457-233850)      | 173 (66-388)  | 8518 (3244-19331)   | 6886 (2624-15700)   |
| <b>Malaysia</b>                   | 25 (9-61)   | 63120 (23495-150520)       | 135 (50-324)  | 334 (123-804)       | 271 (100-655)       |
| <b>Maldives</b>                   | 27 (10-62)  | 1007 (384-2325)            | 143 (54-332)  | 5 (2-12)            | 4 (2-10)            |
| <b>Mali</b>                       | 47 (18-105) | 153660 (59481-342394)      | 243 (94-547)  | 1312 (455-3426)     | 1061 (366-2788)     |
| <b>Marshall Islands</b>           | 38 (14-91)  | 191 (70-455)               | 198 (73-479)  | 1 (0-2)             | 1 (0-2)             |
| <b>Mauritania</b>                 | 35 (14-79)  | 21288 (8273-47320)         | 184 (71-411)  | 116 (45-279)        | 94 (36-226)         |
| <b>Mauritius</b>                  | 36 (14-81)  | 2562 (991-5696)            | 189 (73-423)  | 13 (5-30)           | 11 (4-25)           |
| <b>Mexico</b>                     | 20 (8-47)   | 235595 (88526-547638)      | 108 (40-252)  | 1252 (467-2939)     | 1017 (378-2397)     |

|                                     |             |                          |              |                      |                     |
|-------------------------------------|-------------|--------------------------|--------------|----------------------|---------------------|
| <b>Micronesia (Fed. States of)</b>  | 36 (13-85)  | 417 (155-981)            | 188 (69-447) | 2 (1-5)              | 2 (1-4)             |
| <b>Mongolia</b>                     | 21 (8-51)   | 7088 (2577-17182)        | 109 (39-267) | 37 (13-90)           | 30 (11-73)          |
| <b>Morocco</b>                      | 31 (12-69)  | 105827 (41146-235471)    | 162 (63-362) | 554 (214-1240)       | 448 (173-1009)      |
| <b>Mozambique</b>                   | 44 (17-98)  | 213124 (82285-471772)    | 216 (84-485) | 16227 (6147-36881)   | 13116 (4955-29918)  |
| <b>Myanmar</b>                      | 46 (17-106) | 209183 (77752-483656)    | 238 (88-552) | 1233 (446-3312)      | 996 (359-2688)      |
| <b>Namibia</b>                      | 39 (15-88)  | 13301 (5176-29757)       | 190 (73-426) | 1272 (482-2929)      | 1027 (387-2378)     |
| <b>Nauru</b>                        | 23 (8-61)   | 22 (7-58)                | 121 (41-325) | 0 (0-0)              | 0 (0-0)             |
| <b>Nepal</b>                        | 41 (16-92)  | 115876 (44604-259539)    | 215 (82-486) | 611 (232-1416)       | 494 (188-1148)      |
| <b>Nicaragua</b>                    | 27 (10-60)  | 16144 (6226-36164)       | 139 (53-314) | 84 (32-191)          | 68 (26-155)         |
| <b>Niger</b>                        | 48 (18-109) | 198793 (75021-451921)    | 249 (93-570) | 1040 (391-2404)      | 841 (314-1946)      |
| <b>Nigeria</b>                      | 48 (18-113) | 1500575 (547605-3516956) | 245 (89-581) | 42340 (15306-103084) | 34202 (12350-83467) |
| <b>Niue</b>                         | 25 (9-60)   | 3 (1-8)                  | 131 (48-313) | 0 (0-0)              | 0 (0-0)             |
| <b>Oman</b>                         | 24 (8-60)   | 9074 (3198-23045)        | 125 (44-320) | 48 (17-123)          | 39 (14-101)         |
| <b>Pakistan</b>                     | 46 (18-103) | 1140680 (440718-2552577) | 241 (93-544) | 5937 (2290-13408)    | 4794 (1850-10874)   |
| <b>Palau</b>                        | 27 (10-64)  | 54 (20-128)              | 143 (53-339) | 0 (0-1)              | 0 (0-1)             |
| <b>Panama</b>                       | 20 (8-47)   | 7468 (2815-17298)        | 108 (40-252) | 40 (15-95)           | 33 (12-77)          |
| <b>Papua New Guinea</b>             | 34 (13-77)  | 34224 (13026-76732)      | 179 (68-404) | 275 (93-752)         | 222 (75-611)        |
| <b>Paraguay</b>                     | 27 (10-60)  | 17940 (6950-40317)       | 139 (54-315) | 94 (36-213)          | 76 (29-173)         |
| <b>Peru</b>                         | 20 (8-47)   | 61258 (22882-142437)     | 107 (40-250) | 323 (122-758)        | 262 (98-617)        |
| <b>Philippines</b>                  | 46 (18-107) | 522829 (198457-1204693)  | 241 (91-562) | 2718 (1026-6342)     | 2196 (825-5146)     |
| <b>Qatar</b>                        | 24 (8-60)   | 3114 (1098-7956)         | 125 (44-321) | 16 (6-42)            | 13 (5-35)           |
| <b>Republic of Korea</b>            | 22 (8-53)   | 50195 (18071-120925)     | 117 (42-284) | 267 (96-648)         | 217 (78-529)        |
| <b>Rwanda</b>                       | 25 (9-56)   | 41664 (15875-95655)      | 127 (48-293) | 435 (145-1135)       | 352 (117-922)       |
| <b>Saint Kitts and Nevis</b>        | 20 (8-47)   | 93 (35-216)              | 108 (40-253) | 0 (0-1)              | 0 (0-1)             |
| <b>Saint Lucia</b>                  | 20 (8-47)   | 279 (105-646)            | 108 (40-253) | 1 (1-3)              | 1 (0-3)             |
| <b>Saint Vincent and Grenadines</b> | 20 (8-47)   | 173 (65-400)             | 108 (40-252) | 1 (0-2)              | 1 (0-2)             |
| <b>Samoa</b>                        | 24 (9-59)   | 592 (214-1436)           | 128 (46-314) | 3 (1-8)              | 3 (1-6)             |

|                                    |             |                        |               |                    |                    |
|------------------------------------|-------------|------------------------|---------------|--------------------|--------------------|
| <b>Sao Tome and Principe</b>       | 33 (13-74)  | 977 (377-2181)         | 169 (65-379)  | 22 (6-63)          | 18 (5-51)          |
| <b>Saudi Arabia</b>                | 24 (8-60)   | 74471 (26204-189719)   | 125 (44-320)  | 394 (139-1012)     | 320 (113-823)      |
| <b>Senegal</b>                     | 40 (16-90)  | 104392 (40463-234065)  | 209 (81-468)  | 592 (222-1530)     | 478 (179-1234)     |
| <b>Seychelles</b>                  | 36 (14-80)  | 304 (118-674)          | 189 (72-423)  | 2 (1-4)            | 1 (0-3)            |
| <b>Sierra Leone</b>                | 38 (15-86)  | 38365 (14758-86086)    | 198 (76-444)  | 431 (151-1089)     | 348 (121-885)      |
| <b>Solomon Islands</b>             | 30 (11-68)  | 2440 (929-5538)        | 155 (59-356)  | 13 (5-29)          | 10 (4-24)          |
| <b>Somalia</b>                     | 74 (28-174) | 146691 (54754-342779)  | 386 (142-910) | 927 (320-2483)     | 749 (257-2006)     |
| <b>South Africa</b>                | 37 (15-83)  | 200634 (78038-445634)  | 184 (72-410)  | 13883 (5267-32148) | 11222 (4243-26089) |
| <b>Sri Lanka</b>                   | 31 (12-71)  | 50981 (19092-117264)   | 162 (61-375)  | 266 (100-616)      | 215 (80-500)       |
| <b>Sudan</b>                       | 31 (12-69)  | 184135 (71551-410563)  | 162 (62-363)  | 966 (373-2189)     | 781 (302-1778)     |
| <b>Suriname</b>                    | 20 (8-47)   | 977 (368-2264)         | 108 (40-253)  | 5 (2-12)           | 4 (2-10)           |
| <b>Swaziland</b>                   | 28 (11-65)  | 4888 (1837-11302)      | 128 (48-299)  | 779 (287-1861)     | 630 (231-1514)     |
| <b>Syrian Arab Republic</b>        | 24 (8-60)   | 51656 (18139-132000)   | 125 (44-320)  | 273 (97-701)       | 222 (78-572)       |
| <b>Thailand</b>                    | 27 (10-65)  | 101972 (36671-248355)  | 140 (50-344)  | 531 (190-1307)     | 429 (154-1060)     |
| <b>Timor-Leste</b>                 | 42 (15-100) | 8623 (3129-20397)      | 220 (80-524)  | 45 (16-107)        | 36 (13-86)         |
| <b>Togo</b>                        | 39 (15-87)  | 45439 (17626-100510)   | 200 (78-445)  | 1134 (414-2716)    | 917 (334-2205)     |
| <b>Tonga</b>                       | 24 (9-57)   | 308 (111-733)          | 125 (45-300)  | 2 (1-4)            | 1 (0-3)            |
| <b>Trinidad and Tobago</b>         | 20 (8-47)   | 1949 (732-4516)        | 108 (40-253)  | 12 (4-31)          | 10 (3-25)          |
| <b>Tunisia</b>                     | 24 (8-60)   | 23112 (8104-58931)     | 125 (44-320)  | 122 (43-315)       | 99 (35-257)        |
| <b>Tuvalu</b>                      | 21 (7-53)   | 21 (7-53)              | 111 (39-281)  | 0 (0-0)            | 0 (0-0)            |
| <b>Uganda</b>                      | 37 (14-83)  | 270471 (105347-600568) | 186 (72-413)  | 14679 (5549-34031) | 11864 (4483-27561) |
| <b>United Arab Emirates</b>        | 24 (8-60)   | 11571 (4082-29531)     | 125 (44-320)  | 61 (22-157)        | 50 (18-128)        |
| <b>United Republic of Tanzania</b> | 41 (16-91)  | 383430 (148445-855392) | 207 (80-464)  | 13894 (5175-33123) | 11221 (4172-26893) |
| <b>Uruguay</b>                     | 20 (8-47)   | 4880 (1836-11317)      | 108 (40-252)  | 26 (10-61)         | 21 (8-50)          |
| <b>Vanuatu</b>                     | 37 (14-86)  | 1304 (488-2993)        | 195 (72-452)  | 7 (3-16)           | 5 (2-13)           |
| <b>Venezuela</b>                   | 20 (8-47)   | 60024 (22535-139189)   | 108 (40-252)  | 321 (120-756)      | 260 (97-617)       |
| <b>Viet Nam</b>                    | 39 (14-91)  | 298455 (109028-702805) | 200 (73-474)  | 1557 (569-3699)    | 1257 (458-3001)    |
| <b>Yemen</b>                       | 31 (12-69)  | 121259 (47184-270659)  | 162 (63-363)  | 634 (246-1425)     | 513 (198-1159)     |

|                 |             |                       |              |                    |                    |
|-----------------|-------------|-----------------------|--------------|--------------------|--------------------|
| <b>Zambia</b>   | 47 (18-104) | 132848 (51225-297764) | 225 (87-506) | 12610 (4746-29188) | 10190 (3817-23583) |
| <b>Zimbabwe</b> | 39 (15-86)  | 97432 (37808-216024)  | 186 (72-416) | 10070 (3844-23272) | 8131 (3095-18973)  |

Supplementary table 8: Decrease in incidence of clinical pneumonia in developing countries between 2000 and 2015 (in descending order)

| Country                      | Estimated incidence of clinical pneumonia per 1000 children per year [2000] | Estimated incidence of clinical pneumonia per 1000 children per year [2015] | Reduction in incidence of clinical pneumonia between 2000 and 2015 |
|------------------------------|-----------------------------------------------------------------------------|-----------------------------------------------------------------------------|--------------------------------------------------------------------|
| China                        | 259                                                                         | 84                                                                          | 68%                                                                |
| Niue                         | 467                                                                         | 158                                                                         | 66%                                                                |
| Malaysia                     | 460                                                                         | 159                                                                         | 65%                                                                |
| Palau                        | 460                                                                         | 169                                                                         | 63%                                                                |
| Swaziland                    | 441                                                                         | 176                                                                         | 60%                                                                |
| Cote d'Ivoire                | 315                                                                         | 129                                                                         | 59%                                                                |
| Central African Republic     | 534                                                                         | 227                                                                         | 57%                                                                |
| Madagascar                   | 456                                                                         | 194                                                                         | 57%                                                                |
| Guatemala                    | 388                                                                         | 167                                                                         | 57%                                                                |
| Dem. Peoples's Rep. of Korea | 341                                                                         | 148                                                                         | 57%                                                                |
| Bolivia                      | 277                                                                         | 123                                                                         | 56%                                                                |
| Chad                         | 528                                                                         | 239                                                                         | 55%                                                                |
| Togo                         | 513                                                                         | 245                                                                         | 52%                                                                |
| Angola                       | 327                                                                         | 158                                                                         | 52%                                                                |
| Bahrain                      | 302                                                                         | 148                                                                         | 51%                                                                |
| Iran (Islamic Republic of)   | 302                                                                         | 148                                                                         | 51%                                                                |
| Kuwait                       | 302                                                                         | 148                                                                         | 51%                                                                |
| Lebanon                      | 302                                                                         | 148                                                                         | 51%                                                                |
| Libyan Arab Jamahiriya       | 302                                                                         | 148                                                                         | 51%                                                                |
| Oman                         | 302                                                                         | 148                                                                         | 51%                                                                |
| Qatar                        | 302                                                                         | 148                                                                         | 51%                                                                |
| Saudi Arabia                 | 302                                                                         | 148                                                                         | 51%                                                                |
| United Arab Emirates         | 302                                                                         | 148                                                                         | 51%                                                                |
| South Africa                 | 473                                                                         | 233                                                                         | 51%                                                                |
| Mongolia                     | 259                                                                         | 131                                                                         | 49%                                                                |
| Tuvalu                       | 259                                                                         | 132                                                                         | 49%                                                                |
| Jordan                       | 283                                                                         | 148                                                                         | 48%                                                                |
| Republic of Korea            | 259                                                                         | 137                                                                         | 47%                                                                |
| Tunisia                      | 271                                                                         | 148                                                                         | 45%                                                                |
| Nauru                        | 259                                                                         | 142                                                                         | 45%                                                                |
| Cambodia                     | 462                                                                         | 255                                                                         | 45%                                                                |
| Philippines                  | 521                                                                         | 288                                                                         | 45%                                                                |
| Malawi                       | 396                                                                         | 221                                                                         | 44%                                                                |
| Botswana                     | 437                                                                         | 249                                                                         | 43%                                                                |
| Tonga                        | 259                                                                         | 149                                                                         | 42%                                                                |
| Niger                        | 519                                                                         | 300                                                                         | 42%                                                                |
| Kenya                        | 402                                                                         | 234                                                                         | 42%                                                                |
| Benin                        | 520                                                                         | 306                                                                         | 41%                                                                |



|                              |     |     |     |
|------------------------------|-----|-----|-----|
| Samoa                        | 258 | 153 | 41% |
| Burundi                      | 380 | 231 | 39% |
| Sierra Leone                 | 385 | 239 | 38% |
| Sao Tome and Principe        | 331 | 206 | 38% |
| Fiji                         | 259 | 162 | 37% |
| El Salvador                  | 265 | 166 | 37% |
| Belize                       | 266 | 167 | 37% |
| Colombia                     | 199 | 125 | 37% |
| Kiribati                     | 259 | 163 | 37% |
| Paraguay                     | 265 | 167 | 37% |
| Eritrea                      | 376 | 241 | 36% |
| Peru                         | 197 | 127 | 36% |
| Guinea-Bissau                | 384 | 248 | 35% |
| Comoros                      | 466 | 301 | 35% |
| Gambia                       | 374 | 242 | 35% |
| Rwanda                       | 237 | 154 | 35% |
| Namibia                      | 372 | 245 | 34% |
| Zambia                       | 438 | 289 | 34% |
| Ghana                        | 286 | 190 | 34% |
| Antigua and Barbuda          | 191 | 127 | 34% |
| Argentina                    | 191 | 127 | 34% |
| Bahamas                      | 191 | 127 | 34% |
| Barbados                     | 191 | 127 | 34% |
| Chile                        | 191 | 127 | 34% |
| Ecuador                      | 191 | 127 | 34% |
| Grenada                      | 191 | 127 | 34% |
| Jamaica                      | 191 | 127 | 34% |
| Mexico                       | 191 | 127 | 34% |
| Panama                       | 191 | 127 | 34% |
| Saint Kitts and Nevis        | 191 | 127 | 34% |
| Saint Lucia                  | 191 | 127 | 34% |
| Saint Vincent and Grenadines | 191 | 127 | 34% |
| Suriname                     | 191 | 127 | 34% |
| Trinidad and Tobago          | 191 | 127 | 34% |
| Venezuela                    | 191 | 127 | 34% |
| Dominica                     | 190 | 127 | 33% |
| Uruguay                      | 190 | 127 | 33% |
| Indonesia                    | 487 | 326 | 33% |
| Dem. Rep. of the Congo       | 413 | 278 | 33% |
| Cape Verde                   | 325 | 221 | 32% |
| Mauritania                   | 325 | 221 | 32% |
| Mozambique                   | 405 | 276 | 32% |
| Brazil                       | 244 | 167 | 32% |
| Lesotho                      | 380 | 262 | 31% |

|                             |     |     |     |
|-----------------------------|-----|-----|-----|
| Ethiopia                    | 349 | 242 | 31% |
| Costa Rica                  | 190 | 133 | 30% |
| Nicaragua                   | 236 | 166 | 30% |
| Haiti                       | 317 | 226 | 29% |
| Zimbabwe                    | 339 | 242 | 29% |
| Solomon Islands             | 259 | 185 | 29% |
| Morocco                     | 263 | 193 | 27% |
| Nigeria                     | 401 | 302 | 25% |
| Bangladesh                  | 361 | 277 | 23% |
| Gabon                       | 323 | 248 | 23% |
| Nepal                       | 336 | 259 | 23% |
| Egypt                       | 151 | 117 | 23% |
| Syrian Arab Republic        | 191 | 148 | 23% |
| Dominican Republic          | 187 | 145 | 22% |
| Guinea                      | 313 | 244 | 22% |
| Lao People's Dem. Republic  | 460 | 362 | 21% |
| Burkina Faso                | 349 | 275 | 21% |
| Mauritius                   | 283 | 226 | 20% |
| Algeria                     | 282 | 226 | 20% |
| Seychelles                  | 282 | 226 | 20% |
| Somalia                     | 576 | 464 | 19% |
| Thailand                    | 207 | 167 | 19% |
| Uganda                      | 287 | 232 | 19% |
| Afghanistan                 | 598 | 484 | 19% |
| Mali                        | 362 | 293 | 19% |
| Bhutan                      | 216 | 175 | 19% |
| Myanmar                     | 353 | 286 | 19% |
| Timor-Leste                 | 328 | 266 | 19% |
| Maldives                    | 207 | 168 | 19% |
| Equatorial Guinea           | 287 | 233 | 19% |
| Sri Lanka                   | 237 | 193 | 19% |
| Papua New Guinea            | 259 | 213 | 18% |
| Honduras                    | 201 | 166 | 17% |
| Liberia                     | 240 | 206 | 14% |
| Guyana                      | 265 | 228 | 14% |
| Micronesia (Fed. States of) | 259 | 224 | 14% |
| Vanuatu                     | 259 | 233 | 10% |
| Senegal                     | 278 | 251 | 10% |
| United Republic of Tanzania | 281 | 255 | 9%  |
| Marshall Islands            | 259 | 237 | 8%  |
| Viet Nam                    | 259 | 240 | 7%  |
| India                       | 366 | 352 | 4%  |
| Cameroon                    | 241 | 239 | 1%  |
| Djibouti                    | 193 | 195 | -1% |

|              |     |     |      |
|--------------|-----|-----|------|
| Iraq         | 191 | 193 | -1%  |
| Sudan        | 191 | 193 | -1%  |
| Yemen        | 191 | 193 | -1%  |
| Congo        | 210 | 225 | -7%  |
| Cook Islands | 259 | 285 | -10% |
| Pakistan     | 195 | 289 | -48% |

Supplementary table 9: Decrease in number of episodes of clinical pneumonia in developing countries between 2000 and 2015 (in descending order)

| Country                      | Episodes of clinical pneumonia in 2000 | Episodes of clinical pneumonia in 2015 | Reduction in incidence of clinical pneumonia between 2000 and 2015 (%) |
|------------------------------|----------------------------------------|----------------------------------------|------------------------------------------------------------------------|
| Niue                         | 109                                    | 22                                     | 80%                                                                    |
| Malaysia                     | 1252567                                | 393096                                 | 69%                                                                    |
| Palau                        | 1058                                   | 337                                    | 68%                                                                    |
| China                        | 21664371                               | 7024251                                | 68%                                                                    |
| Dem. Peoples's Rep. of Korea | 676397                                 | 257929                                 | 62%                                                                    |
| Republic of Korea            | 809678                                 | 312376                                 | 61%                                                                    |
| El Salvador                  | 205855                                 | 86519                                  | 58%                                                                    |
| Bolivia                      | 337941                                 | 146047                                 | 57%                                                                    |
| Nauru                        | 312                                    | 136                                    | 56%                                                                    |
| Swaziland                    | 69222                                  | 30585                                  | 56%                                                                    |
| Tuvalu                       | 299                                    | 133                                    | 56%                                                                    |
| Jamaica                      | 54224                                  | 25874                                  | 52%                                                                    |
| Guatemala                    | 721079                                 | 348076                                 | 52%                                                                    |
| Central African Republic     | 315982                                 | 160590                                 | 49%                                                                    |
| Saint Vincent and Grenadines | 2085                                   | 1080                                   | 48%                                                                    |
| Colombia                     | 886715                                 | 466206                                 | 47%                                                                    |
| Iran (Islamic Republic of)   | 1909614                                | 1013570                                | 47%                                                                    |
| South Africa                 | 2287592                                | 1252624                                | 45%                                                                    |
| Saudi Arabia                 | 846478                                 | 466829                                 | 45%                                                                    |
| Tonga                        | 3443                                   | 1918                                   | 44%                                                                    |
| Samoa                        | 6615                                   | 3693                                   | 44%                                                                    |
| Fiji                         | 25507                                  | 14265                                  | 44%                                                                    |
| Madagascar                   | 1296879                                | 729961                                 | 44%                                                                    |
| Cote d'Ivoire                | 831445                                 | 474218                                 | 43%                                                                    |
| Mauritius                    | 27851                                  | 15989                                  | 43%                                                                    |
| Saint Lucia                  | 3020                                   | 1745                                   | 42%                                                                    |

|                             |         |         |     |
|-----------------------------|---------|---------|-----|
| Libyan Arab Jamahiriya      | 165612  | 95809   | 42% |
| Philippines                 | 5569601 | 3244633 | 42% |
| Dominica                    | 1324    | 773     | 42% |
| Chile                       | 253993  | 148432  | 42% |
| Brazil                      | 4256325 | 2503090 | 41% |
| Cape Verde                  | 20141   | 11857   | 41% |
| Uruguay                     | 51639   | 30533   | 41% |
| Paraguay                    | 188106  | 112274  | 40% |
| Nicaragua                   | 166240  | 100819  | 39% |
| Costa Rica                  | 75133   | 46614   | 38% |
| Nepal                       | 1164550 | 725981  | 38% |
| Antigua and Barbuda         | 1479    | 923     | 38% |
| Barbados                    | 3523    | 2201    | 38% |
| Mexico                      | 2343698 | 1472309 | 37% |
| Grenada                     | 1993    | 1260    | 37% |
| Suriname                    | 9634    | 6107    | 37% |
| Tunisia                     | 225313  | 145095  | 36% |
| Peru                        | 593405  | 382408  | 36% |
| Thailand                    | 967387  | 635279  | 34% |
| Rwanda                      | 397823  | 261327  | 34% |
| Cambodia                    | 686893  | 451360  | 34% |
| Guyana                      | 23147   | 15322   | 34% |
| Botswana                    | 99258   | 66395   | 33% |
| Micronesia (Fed. States of) | 3879    | 2597    | 33% |
| Saint Kitts and Nevis       | 867     | 581     | 33% |
| Togo                        | 414104  | 283704  | 31% |
| Bahamas                     | 5377    | 3695    | 31% |
| Oman                        | 81486   | 56952   | 30% |
| Bangladesh                  | 6041515 | 4241015 | 30% |
| Panama                      | 66520   | 46697   | 30% |
| Venezuela                   | 530593  | 375058  | 29% |
| Chad                        | 889337  | 628909  | 29% |

|                            |          |         |     |
|----------------------------|----------|---------|-----|
| Syrian Arab Republic       | 457405   | 323640  | 29% |
| Bhutan                     | 16262    | 11542   | 29% |
| Lesotho                    | 102662   | 73010   | 29% |
| Honduras                   | 189792   | 135049  | 29% |
| Trinidad and Tobago        | 17113    | 12185   | 29% |
| Ecuador                    | 286484   | 204113  | 29% |
| Argentina                  | 657436   | 471297  | 28% |
| Belize                     | 9138     | 6592    | 28% |
| Haiti                      | 387837   | 279997  | 28% |
| Mongolia                   | 60535    | 44238   | 27% |
| Bahrain                    | 21901    | 16058   | 27% |
| Marshall Islands           | 1620     | 1191    | 26% |
| Jordan                     | 196313   | 144730  | 26% |
| Lebanon                    | 92236    | 68089   | 26% |
| Myanmar                    | 1715988  | 1305054 | 24% |
| Eritrea                    | 252602   | 196014  | 22% |
| Indonesia                  | 10234904 | 8106927 | 21% |
| Morocco                    | 821577   | 659275  | 20% |
| Sri Lanka                  | 393835   | 316629  | 20% |
| Dominican Republic         | 191800   | 154361  | 20% |
| Malawi                     | 811482   | 653748  | 19% |
| Namibia                    | 102839   | 82857   | 19% |
| Benin                      | 647464   | 522886  | 19% |
| Lao People's Dem. Republic | 374893   | 303412  | 19% |
| Kenya                      | 2052821  | 1679839 | 18% |
| Ethiopia                   | 4315381  | 3539917 | 18% |
| Angola                     | 892424   | 743818  | 17% |
| Sao Tome and Principe      | 7162     | 6098    | 15% |
| Guinea-Bissau              | 82753    | 71594   | 13% |
| Maldives                   | 7140     | 6289    | 12% |
| Sierra Leone               | 270598   | 239822  | 11% |
| Comoros                    | 39824    | 35902   | 10% |

|                        |          |          |      |
|------------------------|----------|----------|------|
| Solomon Islands        | 16733    | 15154    | 9%   |
| Kuwait                 | 56363    | 51420    | 9%   |
| Seychelles             | 2054     | 1897     | 8%   |
| Mauritania             | 143839   | 132968   | 8%   |
| United Arab Emirates   | 78282    | 72595    | 7%   |
| Kiribati               | 2568     | 2399     | 7%   |
| Afghanistan            | 2551075  | 2395405  | 6%   |
| Ghana                  | 816597   | 770760   | 6%   |
| Timor-Leste            | 57165    | 54259    | 5%   |
| India                  | 45046369 | 43567384 | 3%   |
| Papua New Guinea       | 217962   | 212031   | 3%   |
| Zimbabwe               | 613876   | 606343   | 1%   |
| Gabon                  | 59423    | 59385    | 0%   |
| Zambia                 | 817804   | 824264   | -1%  |
| Viet Nam               | 1844250  | 1859015  | -1%  |
| Gambia                 | 86442    | 88597    | -2%  |
| Mozambique             | 1287681  | 1328171  | -3%  |
| Djibouti               | 19012    | 19864    | -4%  |
| Burundi                | 455332   | 476026   | -5%  |
| Dem. Rep. of the Congo | 3650795  | 3854542  | -6%  |
| Guinea                 | 472902   | 499544   | -6%  |
| Niger                  | 1173726  | 1243350  | -6%  |
| Cook Islands           | 565      | 599      | -6%  |
| Somalia                | 845515   | 914247   | -8%  |
| Vanuatu                | 7326     | 8091     | -10% |
| Nigeria                | 8459265  | 9401585  | -11% |
| Burkina Faso           | 757451   | 865732   | -14% |
| Qatar                  | 16773    | 19550    | -17% |
| Algeria                | 877260   | 1039118  | -18% |
| Egypt                  | 1177828  | 1414776  | -20% |
| Liberia                | 119385   | 144612   | -21% |
| Uganda                 | 1384676  | 1687729  | -22% |

|                             |         |         |      |
|-----------------------------|---------|---------|------|
| Equatorial Guinea           | 24450   | 29912   | -22% |
| Sudan                       | 902948  | 1146911 | -27% |
| Yemen                       | 593564  | 756698  | -27% |
| Cameroon                    | 665451  | 893933  | -34% |
| Mali                        | 694702  | 958538  | -38% |
| Senegal                     | 467974  | 652553  | -39% |
| United Republic of Tanzania | 1655983 | 2397937 | -45% |
| Iraq                        | 736872  | 1104387 | -50% |
| Congo                       | 108072  | 170980  | -58% |
| Pakistan                    | 4099287 | 7120514 | -74% |



Supplementary table 10: Reduction in episodes of clinical pneumonia in HIV-infected children between 2000 and 2015 (in descending order)

| Country                      | Estimated episodes in 2000 | Estimated episodes in 2015 | Reduction in clinical pneumonia in HIV-infected between 2000 and 2015 (%) |
|------------------------------|----------------------------|----------------------------|---------------------------------------------------------------------------|
| Rwanda                       | 19478                      | 2730                       | 86%                                                                       |
| Botswana                     | 18501                      | 3240                       | 82%                                                                       |
| Cote d'Ivoire                | 73607                      | 13820                      | 81%                                                                       |
| Ethiopia                     | 249513                     | 52893                      | 79%                                                                       |
| Central African Republic     | 26995                      | 5816                       | 78%                                                                       |
| Kenya                        | 243421                     | 60951                      | 75%                                                                       |
| Haiti                        | 15817                      | 4065                       | 74%                                                                       |
| Burkina Faso                 | 28310                      | 7281                       | 74%                                                                       |
| Dominican Republic           | 3106                       | 876                        | 72%                                                                       |
| South Africa                 | 293956                     | 86427                      | 71%                                                                       |
| Eritrea                      | 3819                       | 1126                       | 71%                                                                       |
| Jamaica                      | 557                        | 167                        | 70%                                                                       |
| Togo                         | 22939                      | 7112                       | 69%                                                                       |
| China                        | 123010                     | 39027                      | 68%                                                                       |
| Malaysia                     | 6490                       | 2088                       | 68%                                                                       |
| Honduras                     | 2177                       | 714                        | 67%                                                                       |
| Palau                        | 6                          | 2                          | 67%                                                                       |
| Malawi                       | 149884                     | 53271                      | 64%                                                                       |
| Swaziland                    | 13442                      | 4871                       | 64%                                                                       |
| Republic of Korea            | 4591                       | 1666                       | 64%                                                                       |
| Suriname                     | 88                         | 33                         | 62%                                                                       |
| Dem. Peoples's Rep. of Korea | 3511                       | 1367                       | 61%                                                                       |
| Cambodia                     | 6749                       | 2640                       | 61%                                                                       |
| Zimbabwe                     | 156959                     | 62790                      | 60%                                                                       |
| El Salvador                  | 1128                       | 467                        | 59%                                                                       |
| Madagascar                   | 9540                       | 3950                       | 59%                                                                       |
| Bolivia                      | 1845                       | 773                        | 58%                                                                       |
| Ghana                        | 25458                      | 11014                      | 57%                                                                       |
| Liberia                      | 3517                       | 1527                       | 57%                                                                       |
| Benin                        | 10717                      | 4724                       | 56%                                                                       |
| United Republic of Tanzania  | 194405                     | 86882                      | 55%                                                                       |
| Colombia                     | 5032                       | 2478                       | 51%                                                                       |
| Cape Verde                   | 138                        | 68                         | 51%                                                                       |
| Nauru                        | 2                          | 1                          | 50%                                                                       |

|                              |        |       |     |
|------------------------------|--------|-------|-----|
| Niue                         | 2      | 1     | 50% |
| Samoa                        | 38     | 19    | 50% |
| Tonga                        | 20     | 10    | 50% |
| Tuvalu                       | 2      | 1     | 50% |
| Guatemala                    | 3817   | 1926  | 50% |
| Fiji                         | 146    | 75    | 49% |
| Namibia                      | 15194  | 7910  | 48% |
| Chad                         | 30044  | 15758 | 48% |
| Iran (Islamic Republic of)   | 10062  | 5367  | 47% |
| Saint Vincent and Grenadines | 11     | 6     | 45% |
| Saudi Arabia                 | 4451   | 2473  | 44% |
| Saint Lucia                  | 16     | 9     | 44% |
| Mauritius                    | 146    | 83    | 43% |
| Brazil                       | 22998  | 13096 | 43% |
| Dominica                     | 7      | 4     | 43% |
| Belize                       | 103    | 59    | 43% |
| Burundi                      | 12826  | 7429  | 42% |
| Trinidad and Tobago          | 124    | 72    | 42% |
| Thailand                     | 5706   | 3317  | 42% |
| Bahamas                      | 43     | 25    | 42% |
| Zambia                       | 134456 | 78276 | 42% |
| Libyan Arab Jamahiriya       | 871    | 508   | 42% |
| Philippines                  | 28893  | 16888 | 42% |
| Chile                        | 1341   | 788   | 41% |
| Uruguay                      | 274    | 162   | 41% |
| Tunisia                      | 1296   | 768   | 41% |
| Mali                         | 13650  | 8167  | 40% |
| Saint Kitts and Nevis        | 5      | 3     | 40% |
| Paraguay                     | 978    | 588   | 40% |
| Nicaragua                    | 866    | 527   | 39% |
| Congo                        | 7323   | 4536  | 38% |
| Lesotho                      | 23007  | 14278 | 38% |
| Dem. Rep. of the Congo       | 60481  | 37763 | 38% |
| Antigua and Barbuda          | 8      | 5     | 38% |
| Costa Rica                   | 398    | 249   | 37% |
| Nepal                        | 6069   | 3805  | 37% |
| Barbados                     | 19     | 12    | 37% |
| Mexico                       | 12343  | 7826  | 37% |
| Grenada                      | 11     | 7     | 36% |
| Micronesia (Fed. States of)  | 22     | 14    | 36% |
| Niger                        | 10130  | 6496  | 36% |
| Peru                         | 3123   | 2025  | 35% |
| Marshall Islands             | 9      | 6     | 33% |

|                            |        |        |      |
|----------------------------|--------|--------|------|
| Sao Tome and Principe      | 204    | 137    | 33%  |
| Mongolia                   | 343    | 232    | 32%  |
| Venezuela                  | 2954   | 2005   | 32%  |
| Panama                     | 366    | 250    | 32%  |
| Oman                       | 431    | 301    | 30%  |
| Bangladesh                 | 31396  | 22026  | 30%  |
| Ecuador                    | 1537   | 1085   | 29%  |
| Syrian Arab Republic       | 2387   | 1714   | 28%  |
| Argentina                  | 3481   | 2503   | 28%  |
| Bhutan                     | 85     | 62     | 27%  |
| Bahrain                    | 115    | 85     | 26%  |
| Gabon                      | 2394   | 1779   | 26%  |
| Lebanon                    | 485    | 361    | 26%  |
| Cook Islands               | 4      | 3      | 25%  |
| Jordan                     | 1021   | 767    | 25%  |
| Uganda                     | 119754 | 91625  | 23%  |
| Mauritania                 | 906    | 718    | 21%  |
| Indonesia                  | 53117  | 42504  | 20%  |
| Sri Lanka                  | 2054   | 1654   | 19%  |
| Morocco                    | 4272   | 3446   | 19%  |
| Lao People's Dem. Republic | 1945   | 1578   | 19%  |
| Myanmar                    | 9168   | 7599   | 17%  |
| Comoros                    | 228    | 189    | 17%  |
| Solomon Islands            | 95     | 79     | 17%  |
| Kiribati                   | 15     | 13     | 13%  |
| Maldives                   | 38     | 33     | 13%  |
| Guinea-Bissau              | 3368   | 2958   | 12%  |
| Djibouti                   | 375    | 334    | 11%  |
| Viet Nam                   | 10797  | 9716   | 10%  |
| Seychelles                 | 11     | 10     | 9%   |
| Kuwait                     | 296    | 272    | 8%   |
| United Arab Emirates       | 413    | 384    | 7%   |
| Angola                     | 14149  | 13166  | 7%   |
| Afghanistan                | 13240  | 12433  | 6%   |
| Papua New Guinea           | 1830   | 1723   | 6%   |
| Timor-Leste                | 297    | 282    | 5%   |
| India                      | 233949 | 226344 | 3%   |
| Guyana                     | 144    | 140    | 3%   |
| Somalia                    | 5839   | 5717   | 2%   |
| Cameroon                   | 42650  | 41921  | 2%   |
| Vanuatu                    | 42     | 42     | 0%   |
| Nigeria                    | 254032 | 266475 | -5%  |
| Guinea                     | 6397   | 7226   | -13% |
| Algeria                    | 4590   | 5397   | -18% |

|                          |       |        |       |
|--------------------------|-------|--------|-------|
| <b>Qatar</b>             | 88    | 104    | -18%  |
| <b>Senegal</b>           | 3053  | 3636   | -19%  |
| <b>Mozambique</b>        | 82950 | 100838 | -22%  |
| <b>Egypt</b>             | 6229  | 7602   | -22%  |
| <b>Yemen</b>             | 3100  | 3952   | -27%  |
| <b>Sudan</b>             | 4711  | 6018   | -28%  |
| <b>Gambia</b>            | 702   | 905    | -29%  |
| <b>Sierra Leone</b>      | 1821  | 2682   | -47%  |
| <b>Iraq</b>              | 3850  | 5768   | -50%  |
| <b>Pakistan</b>          | 21309 | 36929  | -73%  |
| <b>Equatorial Guinea</b> | 624   | 1271   | -104% |

Supplementary table 11: List of hospital-based studies reporting hospitalisation rate for pneumonia in children younger than 5 years

| Location (author)                                                         | Study period | Region  | No. of hospitalisations | Population  | Hospitalisation rate | LCI  | UCI   |
|---------------------------------------------------------------------------|--------------|---------|-------------------------|-------------|----------------------|------|-------|
| Kassena-Nankana District, Ghana <sup>47</sup>                             | 1990-91      | Africa  | 30                      | 1439        | 20.9                 | 14.6 | 29.8  |
| Western Region, The Gambia <sup>48</sup>                                  | 1993-96      | Africa  |                         |             | 8.0                  | 7.5  | 8.6   |
| Soweto, South Africa <sup>49</sup>                                        | 1998-2001    | Africa  | 1134                    | 41879.38    | 27.1                 | 25.5 | 28.7  |
| Manhiça, Mozambique <sup>7</sup>                                          | 1999-2000    | Africa  |                         | 6020        | 68.0                 | 62.0 | 75.0  |
| Bamako, Mali <sup>50</sup>                                                | 2000         | Africa  |                         | 200160      | 3.5                  | 3.2  | 3.7   |
| Agincourt, South Africa <sup>7</sup>                                      | 2000-01      | Africa  |                         | 8258        | 80.0                 | 75.0 | 86.0  |
| Bondo district, Kenya <sup>51</sup>                                       | 2001-03      | Africa  |                         | 52200       | 7.0                  | 6.6  | 7.4   |
| Upper River Division and Central River Division, The Gambia <sup>47</sup> | 2002-04      | Africa  |                         |             | 10.3                 | 8.9  | 11.9  |
| Kilifi District, Kenya <sup>47</sup>                                      | 2002-08      | Africa  | 5453                    | 274075.4    | 19.9                 | 19.4 | 20.4  |
| Manhiça district, Mozambique <sup>47</sup>                                | 2004-06      | Africa  |                         |             | 24.2                 | 21.7 | 26.9  |
| Bondo district, Nyanza province, Kenya <sup>47</sup>                      | 2007-09      | Africa  | 1694                    | 100911.8389 | 16.8                 | 16.0 | 17.6  |
| The Greater Banjul area and Upper River region, The Gambia <sup>47</sup>  | 2008-09      | Africa  | 898                     | 27086       | 33.2                 | 31.1 | 35.4  |
| Lwak, Kisumu, Kenya <sup>47</sup>                                         | 2008-09      | Africa  | 241                     | 2437.63     | 98.9                 | 87.1 | 112.2 |
| Soweto, South Africa <sup>47</sup>                                        | 2009-10      | Africa  | 1836                    | 123574      | 14.9                 | 14.2 | 15.6  |
| Lwak, Kisumu, Kenya <sup>47</sup>                                         | 2009-10      | Africa  | 177                     | 2058.25     | 86.0                 | 74.2 | 99.7  |
| American Indians and Alaska Natives, USA <sup>52</sup>                    | 1990-95      | America | 7641                    | 678782      | 11.3                 | 11.0 | 11.5  |
| Tennessee, USA <sup>53</sup>                                              | 1995-2003    | America |                         |             | 31.8                 | 31.1 | 32.6  |
| USA <sup>54</sup>                                                         | 1997-99      | America | 569856                  | 76903644    | 7.4                  | 7.4  | 7.4   |
| USA <sup>55</sup>                                                         | 1996-98      | America | 2221                    | 122369      | 18.2                 | 17.4 | 18.9  |
| USA <sup>56</sup>                                                         | 1997-2000    | America | 232552                  | 48127200    | 5.2                  | 5.2  | 5.2   |

|                                                                                            |           |         |        |            |       |       |       |
|--------------------------------------------------------------------------------------------|-----------|---------|--------|------------|-------|-------|-------|
| <b>American Indians and Alaska Natives, USA<sup>57</sup></b>                               | 1999-2001 | America | 11454  | 348486     | 32.9  | 32.3  | 33.5  |
| <b>Colorado, USA<sup>47</sup></b>                                                          | 2000-08   | America | 50469  | 2993352    | 16.9  | 16.7  | 17.0  |
| <b>Monroe County (NY), Davidson County (TN) and Hamilton County (OH), USA<sup>58</sup></b> | 2000-04   | America |        | 183839     | 15.2  | 14.7  | 15.8  |
| <b>USA<sup>54</sup></b>                                                                    | 2001-07   | America | 821914 | 141222337  | 5.8   | 5.8   | 5.8   |
| <b>Paysandú and Salto, Uruguay<sup>47</sup></b>                                            | 2001-04   | America | 2137   | 61950      | 34.5  | 33.1  | 36.0  |
| <b>Yukon Kuskokwim Delta, Alaska, USA<sup>47</sup></b>                                     | 2001-07   | America |        |            | 82.6  | 77.3  | 88.4  |
| <b>Concordia and Parana, Argentina<sup>47</sup></b>                                        | 2002-05   | America | 1601   | 37672      | 14.2  | 13.5  | 14.9  |
| <b>San Lorenzo &amp; Comitancillo, Guatemala<sup>47</sup></b>                              | 2002-04   | America |        |            | 18.4  | 11.8  | 28.9  |
| <b>USA<sup>59</sup></b>                                                                    | 2003      | America |        |            | 18.63 | 17.64 | 19.62 |
| <b>Pilar, (Buenos Aires Province), Argentina<sup>47</sup></b>                              | 2003-05   | America | 856    | 81627      | 10.5  | 9.8   | 11.2  |
| <b>USA<sup>56</sup></b>                                                                    | 2003-06   | America | 232552 | 48127200   | 4.8   | 4.8   | 4.9   |
| <b>San José, Costa Rica<sup>47</sup></b>                                                   | 2007-09   | America |        |            | 3.7   | 3.2   | 4.2   |
| <b>Goiânia, Brazil<sup>47</sup></b>                                                        | 2007-09   | America |        |            | 21.6  | 20.7  | 22.6  |
| <b>Multicentric, El Salvador<sup>47</sup></b>                                              | 2007-08   | America | 31209  | 1114176    | 28.0  | 27.7  | 28.3  |
| <b>Santa Rosa, Guatemala<sup>47</sup></b>                                                  | 2007-08   | America | 187    | 12700.6638 | 14.7  | 12.8  | 17.0  |
| <b>Paysandú and Salto, Uruguay<sup>47</sup></b>                                            | 2009      | America | 922    | 20650      | 44.7  | 41.9  | 47.6  |
| <b>Colorado, USA<sup>47</sup></b>                                                          | 2009      | America | 6338   | 360188     | 17.6  | 17.2  | 18.0  |
| <b>Santa Rosa, Guatemala<sup>47</sup></b>                                                  | 2009-10   | America | 676    | 21939.8487 | 30.8  | 28.6  | 33.2  |
| <b>Quetzaltenango, Guatemala<sup>47</sup></b>                                              | 2009-10   | America | 517    | 53033.336  | 9.8   | 8.9   | 10.6  |
| <b>Yukon Kuskokwim Delta, Alaska, USA<sup>47</sup></b>                                     | 2009-10   | America |        |            | 64.3  | 53.4  | 77.4  |

|                                               |           |                       |       |         |      |      |      |
|-----------------------------------------------|-----------|-----------------------|-------|---------|------|------|------|
| <b>Multicentric, El Salvador<sup>47</sup></b> | 2009-10   | America               | 37931 | 1124341 | 33.7 | 33.4 | 34.1 |
| <b>Multicentric, Pakistan<sup>60</sup></b>    | 2002-03   | Eastern Mediterranean | 137   | 13364   | 10.3 | 8.7  | 12.1 |
| <b>Karachi, Pakistan<sup>61</sup></b>         | 2007-08   | Eastern Mediterranean | 58    | 3950    | 14.7 | 11.4 | 19.0 |
| <b>Scotland, United Kingdom<sup>62</sup></b>  | 1981-2005 | Europe                | 16840 | 7679789 | 2.2  | 2.2  | 2.2  |
| <b>Kuopio, Finland<sup>63</sup></b>           | 1981-82   | Europe                | 55    | 2917    | 18.9 | 14.5 | 24.6 |
| <b>Spain<sup>64</sup></b>                     | 1995-96   | Europe                | 15877 | 3213968 | 4.9  | 4.9  | 5.0  |
| <b>Spain<sup>65</sup></b>                     | 1995-98   | Europe                | 32123 | 7684928 | 4.2  | 4.1  | 4.2  |
| <b>Valencia, Spain<sup>66</sup></b>           | 1995-2000 | Europe                | 23    | 3270    | 7.0  | 4.7  | 10.6 |
| <b>Valencia, Spain<sup>67</sup></b>           | 1995-2001 | Europe                | 8181  | 1582398 | 5.2  | 5.1  | 5.3  |
| <b>Gipuzoka, Spain<sup>68</sup></b>           | 1996-2000 | Europe                | 635   | 62800   | 10.1 | 9.4  | 10.9 |
| <b>Kiel, Germany<sup>69</sup></b>             | 1996-2000 | Europe                | 367   | 53655   | 6.8  | 6.2  | 7.6  |
| <b>Netherlands<sup>70</sup></b>               | 1999-2000 | Europe                | 3041  | 980986  | 3.1  | 3.0  | 3.2  |
| <b>Multicentric, Germany<sup>71</sup></b>     | 1999-2001 | Europe                |       |         | 23.2 | 23.0 | 23.5 |
| <b>Liguria, Italy<sup>72</sup></b>            | 2000-04   | Europe                |       |         | 4.1  | 3.8  | 4.5  |
| <b>Gipuzoka, Spain<sup>73</sup></b>           | 2004-07   | Europe                |       |         | 20.7 | 19.0 | 22.5 |
| <b>Netherlands<sup>70</sup></b>               | 2006-07   | Europe                | 3303  | 971471  | 3.4  | 3.3  | 3.5  |
| <b>Limousin, France<sup>74</sup></b>          | 2007-08   | Europe                |       |         | 8.0  | 6.7  | 9.5  |
| <b>Matlab, Bangladesh<sup>75</sup></b>        | 1988-89   | South-East Asia       | 27    | 503.39  | 53.6 | 36.8 | 78.2 |
| <b>Kamalapur, Bangladesh<sup>76</sup></b>     | 1999-2000 | South-East Asia       |       |         | 40.5 | 30.0 | 54.9 |
| <b>Lombok, Indonesia<sup>47</sup></b>         | 1999-2002 | South-East Asia       |       |         | 30.9 | 30.1 | 31.8 |
| <b>Matlab, Bangladesh<sup>77</sup></b>        | 1999-2001 | South-East Asia       | 1250  | 24902   | 50.2 | 47.5 | 53.1 |
| <b>Bhaktapur, Nepal<sup>78</sup></b>          | 2004-07   | South-East Asia       |       |         | 4.3  | 3.3  | 5.7  |
| <b>Kathmandu, Nepal<sup>79</sup></b>          | 2004-07   | South-East Asia       | 967   | 150945  | 6.2  | 5.9  | 6.5  |

|                                                                   |         |                 |       |             |       |       |       |
|-------------------------------------------------------------------|---------|-----------------|-------|-------------|-------|-------|-------|
| <b>Nakhon Phanom and Sa Kaeo provinces, Thailand<sup>80</sup></b> | 2005-10 | South-East Asia | 28543 |             | 57.7  | 57.1  | 58.4  |
| <b>Mirzapur, Bangladesh<sup>47</sup></b>                          | 2004-08 | South-East Asia | 4444  | 41040       | 19.0  | 17.7  | 20.4  |
| <b>Patan, Nepal<sup>81</sup></b>                                  | 2005-06 | South-East Asia | 360   | 56875       | 6.3   | 5.7   | 7.0   |
| <b>Multicentric, India<sup>47</sup></b>                           | 2005-07 | South-East Asia |       |             | 25.6  | 23.5  | 28.0  |
| <b>Bangalore, India<sup>82</sup></b>                              | 2006    | South-East Asia | 967   | 150945      | 6.4   | 6.0   | 6.8   |
| <b>Kamalapur, Bangladesh<sup>47</sup></b>                         | 2008    | South-East Asia | 109   | 4547.00229  | 24.0  | 19.9  | 28.9  |
| <b>Multicentric, Bangladesh<sup>47</sup></b>                      | 2008    | South-East Asia | 96    | 6864        | 14.0  | 11.5  | 17.1  |
| <b>Kamalapur, Bangladesh<sup>47</sup></b>                         | 2009-10 | South-East Asia | 151   | 7193.820435 | 20.99 | 17.9  | 24.62 |
| <b>Multicentric, Bangladesh<sup>47</sup></b>                      | 2009    | South-East Asia | 186   | 14037       | 13.3  | 11.5  | 15.3  |
| <b>Ballabgarh, Haryana, India<sup>47</sup></b>                    | 2009-10 | South-East Asia | 25    | 4840        | 3.7   | 2.6   | 5.2   |
| <b>Alabang (Metro Manila), Philippines<sup>83</sup></b>           | 1985-87 | Western Pacific | 34    | 1418.3      | 24.0  | 17.1  | 33.6  |
| <b>Western Australia, Australia<sup>84</sup></b>                  | 1988-93 | Western Pacific | 7719  | 757610      | 10.2  | 10.0  | 10.4  |
| <b>Zhejiang, China<sup>85</sup></b>                               | 1990-91 | Western Pacific | 64    | 7472        | 8.57  | 6.7   | 10.94 |
| <b>Zhejiang, China<sup>86</sup></b>                               | 1990-91 | Western Pacific | 12    | 1215        | 9.88  | 5.61  | 17.39 |
| <b>Heilongjiang, China<sup>87</sup></b>                           | 1991-93 | Western Pacific | 503   | 9901        | 50.8  | 46.55 | 55.44 |



|                                                   |           |                 |       |         |        |        |        |
|---------------------------------------------------|-----------|-----------------|-------|---------|--------|--------|--------|
| <b>Shangdong, China<sup>88</sup></b>              | 1992-93   | Western Pacific | 34    | 16751   | 2.03   | 1.45   | 2.84   |
| <b>Chongqing, China<sup>89</sup></b>              | 1992-93   | Western Pacific | 70    | 2246    | 31.17  | 24.66  | 39.39  |
| <b>Heilongjiang, China<sup>90</sup></b>           | 1993      | Western Pacific | 37    | 5812    | 6.37   | 4.61   | 8.79   |
| <b>Auckland, New Zealand<sup>91</sup></b>         | 1993-96   | Western Pacific | 548   | 50280   | 10.9   | 10.0   | 11.9   |
| <b>Fujian, China<sup>92</sup></b>                 | 1994-95   | Western Pacific | 226   | 9323    | 24.24  | 21.28  | 27.62  |
| <b>Henan, China<sup>93</sup></b>                  | 1994      | Western Pacific | 184   | 7917    | 23.24  | 20.11  | 26.85  |
| <b>Jiangsu, China<sup>94</sup></b>                | 1994-95   | Western Pacific | 110   | 11729   | 9.38   | 7.78   | 11.31  |
| <b>Henan, China<sup>95</sup></b>                  | 1994-96   | Western Pacific | 1402  | 29590   | 47.38  | 44.96  | 49.93  |
| <b>Fujian, China<sup>96</sup></b>                 | 1994-95   | Western Pacific | 112   | 4665    | 24.01  | 19.95  | 28.89  |
| <b>Yunnan, China<sup>97</sup></b>                 | 1995-97   | Western Pacific | 1364  | 6966    | 195.81 | 185.69 | 206.48 |
| <b>Shandong, China<sup>98</sup></b>               | 1995-2001 | Western Pacific | 5823  | 375629  | 15.5   | 15.11  | 15.91  |
| <b>Shangdong, China<sup>99</sup></b>              | 1995-2004 | Western Pacific | 6916  | 537734  | 12.86  | 12.56  | 13.17  |
| <b>Western Australia, Australia<sup>100</sup></b> | 1996-2005 | Western Pacific | 9358  | 360517  | 20.9   | 20.6   | 21.2   |
| <b>Bohol, Philippines<sup>47</sup></b>            | 2000-04   | Western Pacific |       |         | 33.2   | 30.3   | 36.4   |
| <b>Tongatapu, Tonga<sup>101</sup></b>             | 2000-04   | Western Pacific |       | N/A     | 10.1   | 9.3    | 11.0   |
| <b>Hong Kong SAR, China<sup>102</sup></b>         | 2000-05   | Western Pacific | 18315 | 2131182 | 8.6    | 8.5    | 8.7    |

|                                                                |           |                 |        |          |      |      |      |
|----------------------------------------------------------------|-----------|-----------------|--------|----------|------|------|------|
| <b>Suva, Fiji<sup>103</sup></b>                                | 2001-02   | Western Pacific | 377.17 | 20954    | 18.0 | 16.3 | 19.9 |
| <b>NhaTrang district, Vietnam<sup>104</sup></b>                | 2005-06   | Western Pacific | 556    | 24641    | 22.6 | 20.8 | 24.5 |
| <b>Tongatapu, Tonga<sup>101</sup></b>                          | 2006-07   | Western Pacific |        | 10322    | 7.2  | 6.1  | 8.5  |
| <b>NhaTrang city, Vietnam<sup>105</sup></b>                    | 2007-08   | Western Pacific | 474    | 13941    | 34.0 | 31.1 | 37.2 |
| <b>Biliran Island, The Philippines<sup>106</sup></b>           | 2011-12   | Western Pacific | 94     | 4510     | 20.8 |      |      |
| <b>Kilifi District, Kenya<sup>107</sup></b>                    | 2007-10   | Africa          | 603    | 45644    | 13.2 | 12.7 | 13.8 |
| <b>Australia<sup>108</sup></b>                                 | 1998-2004 | Western Pacific | 53452  | 7686007  | 7.0  |      |      |
| <b>Australia<sup>108</sup></b>                                 | 2005-10   | Western Pacific | 33472  | 6734296  | 5.0  |      |      |
| <b>Commercial Claims database, United States<sup>109</sup></b> | 2007-11   | America         | 87461  | 11190358 | 7.8  |      |      |
| <b>Medicaid database, United States<sup>109</sup></b>          | 2007-11   | America         | 79250  | 5716641  | 13.9 |      |      |
| <b>Bangalore, India<sup>110</sup></b>                          | 2009-11   | South-East Asia | 883    | 224966   | 3.9  |      |      |
| <b>Northwestern Ontario, Canada<sup>111</sup></b>              | 2007-09   | America         | 102    |          | 51.0 |      |      |
| <b>Metro Manila, Philippines<sup>112</sup></b>                 | 2007-09   | Western Pacific | 4699   | 158426   | 29.7 |      |      |

Supplementary table 12: Hospitalisation rate (per 1000 children younger than 5 year per year) for pneumonia in young children (2000-2015) by World Bank income regions

| Region               | 2000            | 2005            | 2010             | 2015             |
|----------------------|-----------------|-----------------|------------------|------------------|
| <b>Middle income</b> | 11.5 (7.1-18.6) | 15.7 (9.7-25.4) | 21.4 (13.2-34.7) | 29.3 (18.1-47.5) |
| <b>Low income</b>    | 5.0 (2.2-11.3)  | 8.1 (3.5-18.3)  | 13.0 (5.7-29.5)  | 21.0 (9.2-47.7)  |

Supplementary table 13: Hospitalisation rate (per 1000 children younger than 5 year per year) and estimated hospitalisations for pneumonia in young children (2000-2015) by World Bank income regions

| Region               | Hospitalisation rate (2000) | Hospitalisations (2000) in millions | Hospitalisation rate (2015) | Hospitalisations (2015) in millions |
|----------------------|-----------------------------|-------------------------------------|-----------------------------|-------------------------------------|
| <b>Low income</b>    | 5.0 (2.2-11.4)              | 0.3 (0.2-0.8)                       | 20.9 (9.1-47.9)             | 2.1 (0.9-4.8)                       |
| <b>Middle income</b> | 11.5 (7.1-18.5)             | 5.4 (3.3-8.7)                       | 29.3 (18.1-47.4)            | 14.3 (8.8-23.2)                     |

Supplementary table 14: List of studies reporting in hospital case fatality ratio for children admitted with pneumonia

| Study                                                                     | Median study year | WHO region      | World Bank Income Region | CFR (95%CI)     |
|---------------------------------------------------------------------------|-------------------|-----------------|--------------------------|-----------------|
| Goiânia, Brazil <sup>47</sup>                                             | 2008              | Americas        | Upper middle             | 0.3 (0.2 ,0.5)  |
| Upper River Division and Central River Division, The Gambia <sup>47</sup> | 2003              | Africa          | Low income               | 12 (7.4 ,19.3)  |
| Multihospital surveillance, Bangladesh <sup>47</sup>                      | 2006              | South East Asia | Low income               | 8 (7.3 ,8.7)    |
| Multicentric, El Salvador <sup>47</sup>                                   | 2007              | Americas        | Lower middle income      | 1.1 (1 ,1.2)    |
| NhaTrang district, Vietnam (Anh et al., 2009) <sup>104</sup>              | 2006              | Western Pacific | Lower middle income      | 2.6 (1.7 ,4.1)  |
| Kilifi District, Kenya <sup>47</sup>                                      | 2005              | Africa          | Low income               | 9.5 (8.7 ,10.4) |
| Bondo district, Kenya <sup>51</sup>                                       | 2002              | Africa          | Low income               | 11 (9.2 ,13.2)  |
| Paysandú and Salto, Uruguay <sup>47</sup>                                 | 2002              | Americas        | High income              | 0.3 (0.2 ,0.7)  |
| Pilar, Argentina <sup>47</sup>                                            | 2004              | Americas        | Lower middle income      | 0.2 (0.1 ,0.9)  |
| Santa Rosa, Guatemala <sup>47</sup>                                       | 2008              | Americas        | Guatemala                | 4.8 (2.5 ,9.3)  |
| Goiânia, Brazil <sup>47</sup>                                             | 2007              | Americas        | Lower middle income      | 1.1 (0.3 ,3.3)  |
| Nakhon Phanom and Sa Kaeo provinces, Thailand <sup>47</sup>               | 2007              | South East Asia | Upper middle             | 0.8 (0.7 ,1)    |
| Bangalore, India <sup>82</sup>                                            | 2006              | South East Asia | Lower middle income      | 5.8 (4.5 ,7.5)  |
| Patan, Nepal <sup>81</sup>                                                | 2006              | South East Asia | Low income               | 2.2 (1.1 ,4.4)  |
| Kamalapur, Bangladesh <sup>47</sup>                                       | 2008              | South East Asia | Low income               | 0.9 (0.1 ,6.5)  |
| Bohol, Philippines <sup>47</sup>                                          | 2002              | Western Pacific | Lower middle income      | 1.6 (0.9 ,2.9)  |
| Suva, Fiji <sup>103</sup>                                                 | 2002              | Western Pacific | Upper middle             | 2.8 (1.4 ,5.9)  |
| Paysandú and Salto, Uruguay <sup>47</sup>                                 | 2009              | Americas        | High income              | 5.1 (3.8 ,6.8)  |
| Nakhon Phanom and Sa Kaeo provinces, Thailand <sup>47</sup>               | 2009              | South East Asia | Upper middle             | 0.4 (0.2 ,0.6)  |
| Kamalapur, Bangladesh <sup>47</sup>                                       | 2009              | South East Asia | Low income               | 0.7 (0.1 ,4.7)  |

| Study                                                                    | Median study year | WHO region            | World Bank Income Region | CFR (95%CI)      |
|--------------------------------------------------------------------------|-------------------|-----------------------|--------------------------|------------------|
| Soweto, South Africa <sup>47</sup>                                       | 2010              | Africa                | Upper middle             | 0.8 (0.5 ,1.4)   |
| Manhiça district, Mozambique <sup>47</sup>                               | 2005              | Africa                | Low income               | 8.8 (6.6 ,11.7)  |
| Multicentric, India <sup>47</sup>                                        | 2006              | South East Asia       | Lower middle income      | 0.3 (0.1 ,1.2)   |
| Bondo district, Kenya <sup>47</sup>                                      | 2008              | Africa                | Low income               | 4.3 (3.2 ,5.8)   |
| The Greater Banjul area and Upper River region, The Gambia <sup>47</sup> | 2009              | Africa                | Low income               | 3.7 (2.6 ,5.2)   |
| Lwak, Kisumu, Kenya <sup>47</sup>                                        | 2009              | Africa                | Low income               | 1.6 (0.7 ,3.2)   |
| Kibera, Nairobi, Kenya <sup>47</sup>                                     | 2009              | Africa                | Low income               | 1.4 (0.5 ,3.7)   |
| Karachi, Pakistan <sup>61</sup>                                          | 2008              | Eastern Mediterranean | Lower middle income      | 3.7 (0.9 ,14.8)  |
| Lwak, Kisumu, Kenya <sup>47</sup>                                        | 2010              | Africa                | Low income               | 1 (0.3 ,3.1)     |
| Kibera, Nairobi, Kenya <sup>47</sup>                                     | 2010              | Africa                | Low income               | 0.6 (0.2 ,1.9)   |
| Santa Rosa, Guatemala <sup>47</sup>                                      | 2010              | Americas              | Lower middle income      | 5 (3.6 ,7)       |
| Quetzaltenango, Guatemala <sup>47</sup>                                  | 2010              | Americas              | Lower middle income      | 3.5 (2.2 ,5.5)   |
| Soweto, South Africa <sup>47</sup>                                       | 2002              | Africa                | Upper middle             | 6.3 (5.4 ,7.3)   |
| Concordia and Parana, Argentina <sup>47</sup>                            | 2004              | Americas              | Lower middle income      | 1.1 (0.7 ,1.7)   |
| Mirzapur, Bangladesh <sup>47</sup>                                       | 2006              | South East Asia       | Low income               | 2.2 (1.4 ,3.5)   |
| Lombok, Indonesia <sup>47</sup>                                          | 2001              | South East Asia       | Lower middle income      | 11 (10.2 ,11.9)  |
| Multicentre, Kenya <sup>113</sup>                                        | 2008              | Africa                | Low income               | 5.9 (5.1 ,6.8)   |
| Western Australia <sup>114</sup>                                         | 2001              | Western Pacific       | High income              | 0.9 (0.7 ,1.2)   |
| Guriel district, Somalia <sup>115</sup>                                  | 2010              | Africa                | Low income               | 2.1 (1.6 ,2.7)   |
| Chennai, India <sup>116</sup>                                            | 2007              | South East Asia       | Lower middle income      | 8.2 (7.4 ,9.1)   |
| Blantyre, Malawi <sup>117</sup>                                          | 2006              | Africa                | Low income               | 12.2 (8.2 ,18.1) |
| Kilifi, Kenya <sup>118</sup>                                             | 2007              | Africa                | Low income               | 6 (4.3 ,8.4)     |
| Biliran, The Philippines <sup>106</sup>                                  | 2011              | Western Pacific       | Lower middle income      | 1.4 (0.4 ,5.8)   |

| Study                                       | Median study year | WHO region      | World Bank Income Region | CFR (95%CI)       |
|---------------------------------------------|-------------------|-----------------|--------------------------|-------------------|
| Bangalore, India <sup>110</sup>             | 2010              | South East Asia | Lower middle income      | 0.8 (0.6 ,1.1)    |
| Multicentre, Malawi <sup>119</sup>          | 2001              | Africa          | Low income               | 15.2 (13.3 ,17.3) |
| Multicentre, Malawi <sup>119</sup>          | 2002              | Africa          | Low income               | 11.3 (10.2 ,12.6) |
| Multicentre, Malawi <sup>119</sup>          | 2003              | Africa          | Low income               | 9.1 (8.2 ,10)     |
| Multicentre, Malawi <sup>119</sup>          | 2004              | Africa          | Low income               | 9.2 (8.3 ,10.2)   |
| Multicentre, Malawi <sup>119</sup>          | 2005              | Africa          | Low income               | 9.7 (9 ,10.5)     |
| Multicentre, Malawi <sup>119</sup>          | 2006              | Africa          | Low income               | 7.4 (6.8 ,8)      |
| Multicentre, Malawi <sup>119</sup>          | 2007              | Africa          | Low income               | 6.8 (6.4 ,7.4)    |
| Multicentre, Malawi <sup>119</sup>          | 2008              | Africa          | Low income               | 7.3 (6.8 ,7.9)    |
| Multicentre, Malawi <sup>119</sup>          | 2009              | Africa          | Low income               | 6.1 (5.7 ,6.5)    |
| Multicentre, Malawi <sup>119</sup>          | 2010              | Africa          | Low income               | 5.3 (4.9 ,5.6)    |
| Multicentre, Malawi <sup>119</sup>          | 2011              | Africa          | Low income               | 4.1 (3.8 ,4.4)    |
| Multicentre, Malawi <sup>119</sup>          | 2012              | Africa          | Low income               | 4.5 (4.2 ,4.9)    |
| Colorado, USA <sup>47</sup>                 | 2004              | Americas        | High income              | 0.6 (0.5 ,0.7)    |
| USA <sup>54</sup>                           | 2000              | Americas        | High income              | 0.2 (0.2 ,0.2)    |
| Colorado, USA <sup>47</sup>                 | 2009              | Americas        | High income              | 0.8 (0.6 ,1.1)    |
| Tuscany, Italy <sup>120</sup>               | 2005              | Europe          | High income              | 0.1 (0 ,0.2)      |
| Poznań and Poznański, Poland <sup>121</sup> | 2008              | Europe          | High income              | 0.1 (0 ,0.6)      |
| Malawi <sup>122</sup>                       | 2002              | Africa          | Low income               | 10.4 (9.9 ,10.9)  |
| Mozambique <sup>123</sup>                   | 2007              | Africa          | Low income               | 9.8 (7.9 ,12.2)   |
| Bangladesh <sup>124</sup>                   | 2012              | South-east Asia | Lower middle income      | 0 (0 ,0.2)        |

Supplementary table 15: Number of children aged below 5 years residing in low and middle income countries and exposed to the risk factors for pneumonia in 2000 and 2015

| Risk factor                 | year | Number of children exposed (uncertainty range) | Percentage of children <5 exposed (UR) |
|-----------------------------|------|------------------------------------------------|----------------------------------------|
| HIV                         | 2000 | 1517247 (1413328-1652981)                      | 0.29 (0.27-0.32)                       |
| HIV                         | 2015 | 1046529 (979467-1116290)                       | 0.18 (0.17-0.19)                       |
| Incomplete immunisation     | 2000 | 177383184 (175158137-179486533)                | 34.14 (33.71-34.54)                    |
| Incomplete immunisation     | 2015 | 143938193 (143106886-144715979)                | 24.82 (24.68-24.95)                    |
| Indoor air pollution        | 2000 | 283449840 (282633011-284312655)                | 54.55 (54.39-54.71)                    |
| Indoor air pollution        | 2015 | 317162319 (316345916-317999622)                | 54.69 (54.55-54.83)                    |
| Low birth weight            | 2000 | 45058267 (43611587-46448152)                   | 8.67 (8.39-8.94)                       |
| Low birth weight            | 2015 | 56102037 (55579933-56663706)                   | 9.67 (9.58-9.77)                       |
| Malnutrition                | 2000 | 169994730 (167422035-172307433)                | 32.71 (32.22-33.16)                    |
| Malnutrition                | 2015 | 138866321 (138055666-139679023)                | 23.94 (23.8-24.08)                     |
| Non-exclusive breastfeeding | 2000 | 111180903 (110285434-112158640)                | 21.4 (21.22-21.58)                     |
| Non-exclusive breastfeeding | 2015 | 145729789 (144969738-146520225)                | 25.13 (25-25.26)                       |
| Overcrowding                | 2000 | 274991971 (272641751-277504089)                | 52.92 (52.47-53.4)                     |
| Overcrowding                | 2015 | 269602621 (268770720- 270498009)               | 46.49 (46.34-46.64)                    |



Supplementary table 16: Number and proportion of children aged below 5 years exposed to risk factors for pneumonia in 2000 and 2015 by WHO region

| WHO Region | Risk factor                 | Year | Number of children <5 years exposed | Proportion of children <5 years exposed |
|------------|-----------------------------|------|-------------------------------------|-----------------------------------------|
| Africa     | HIV                         | 2000 | 1359327 (1281359-1444812)           | 1.23 (1.16-1.31)                        |
| Africa     | HIV                         | 2015 | 935157 (876380-993682)              | 0.59 (0.56-0.63)                        |
| Africa     | Incomplete immunisation     | 2000 | 50187173 (49811529-50553124)        | 45.51 (45.17-45.84)                     |
| Africa     | Incomplete immunisation     | 2015 | 48954267 (48596704-49319121)        | 31.01 (30.78-31.24)                     |
| Africa     | Indoor air pollution        | 2000 | 83067674 (82801791-83327464)        | 75.32 (75.08-75.56)                     |
| Africa     | Indoor air pollution        | 2015 | 126385468 (126057269-126691254)     | 80.05 (79.85-80.25)                     |
| Africa     | Low birth weight            | 2000 | 6677566 (6502727-6846623)           | 6.05 (5.9-6.21)                         |
| Africa     | Low birth weight            | 2015 | 11740886 (11527591-11967748)        | 7.44 (7.3-7.58)                         |
| Africa     | Malnutrition                | 2000 | 30637217 (30250518-30996126)        | 27.78 (27.43-28.11)                     |
| Africa     | Malnutrition                | 2015 | 39398207 (39023342-39778736)        | 24.96 (24.72-25.2)                      |
| Africa     | Non-exclusive breastfeeding | 2000 | 35199474 (34854015-35561790)        | 31.92 (31.6-32.25)                      |
| Africa     | Non-exclusive breastfeeding | 2015 | 35631421 (35302371-35962243)        | 22.57 (22.36-22.78)                     |
| Africa     | Overcrowding                | 2000 | 65676921 (65271690-66080104)        | 59.55 (59.18-59.92)                     |
| Africa     | Overcrowding                | 2015 | 90697231 (90271048-91113680)        | 57.45 (57.18-57.71)                     |
| Americas   | HIV                         | 2000 | 38890 (26547-57112)                 | 0.07 (0.05-0.1)                         |
| Americas   | HIV                         | 2015 | 15739 (11001-22377)                 | 0.03 (0.02-0.04)                        |
| Americas   | Incomplete immunisation     | 2000 | 14701969 (14415651-14983042)        | 26.06 (25.55-26.56)                     |
| Americas   | Incomplete immunisation     | 2015 | 7839078 (7681172-8013075)           | 14.91 (14.61-15.24)                     |
| Americas   | Indoor air pollution        | 2000 | 28525155 (28174495-28858713)        | 50.56 (49.94-51.15)                     |
| Americas   | Indoor air pollution        | 2015 | 20430282 (20221678-20651161)        | 38.87 (38.47-39.29)                     |
| Americas   | Low birth weight            | 2000 | 4979795 (4778269-5180071)           | 8.83 (8.47-9.18)                        |
| Americas   | Low birth weight            | 2015 | 4837143 (4703597-4981895)           | 9.2 (8.95-9.48)                         |
| Americas   | Malnutrition                | 2000 | 4396997 (4224571-4574243)           | 7.79 (7.49-8.11)                        |
| Americas   | Malnutrition                | 2015 | 4167716 (4036279-4302185)           | 7.93 (7.68-8.18)                        |
| Americas   | Non-exclusive breastfeeding | 2000 | 19656560 (19341361-19974090)        | 34.84 (34.28-35.41)                     |
| Americas   | Non-exclusive breastfeeding | 2015 | 9580729 (9405765-9754210)           | 18.23 (17.89-18.56)                     |

|                              |                             |      |                                 |                     |
|------------------------------|-----------------------------|------|---------------------------------|---------------------|
| <b>Americas</b>              | Overcrowding                | 2000 | 25569037 (25246038-25902275)    | 45.32 (44.75-45.91) |
| <b>Americas</b>              | Overcrowding                | 2015 | 23529458 (23292239-23750698)    | 44.76 (44.31-45.18) |
| <b>Eastern Mediterranean</b> | HIV                         | 2000 | 9669 (5093-17317)               | 0.02 (0.01-0.03)    |
| <b>Eastern Mediterranean</b> | HIV                         | 2015 | 13007 (7673-21274)              | 0.02 (0.01-0.03)    |
| <b>Eastern Mediterranean</b> | Incomplete immunisation     | 2000 | 13764639 (13516337-14022351)    | 21.42 (21.03-21.82) |
| <b>Eastern Mediterranean</b> | Incomplete immunisation     | 2015 | 18091538 (17822412-18357222)    | 22.74 (22.4-23.07)  |
| <b>Eastern Mediterranean</b> | Indoor air pollution        | 2000 | 33190463 (32935988-33426011)    | 51.65 (51.26-52.02) |
| <b>Eastern Mediterranean</b> | Indoor air pollution        | 2015 | 27006480 (26748652-27264002)    | 33.94 (33.61-34.26) |
| <b>Eastern Mediterranean</b> | Low birth weight            | 2000 | 5671189 (5516894-5818944)       | 8.83 (8.59-9.06)    |
| <b>Eastern Mediterranean</b> | Low birth weight            | 2015 | 8694050 (8533716-8856996)       | 10.93 (10.72-11.13) |
| <b>Eastern Mediterranean</b> | Malnutrition                | 2000 | 7715006 (7546633-7889825)       | 12.01 (11.74-12.28) |
| <b>Eastern Mediterranean</b> | Malnutrition                | 2015 | 15451407 (15197935-15747717)    | 19.42 (19.1-19.79)  |
| <b>Eastern Mediterranean</b> | Non-exclusive breastfeeding | 2000 | 17738982 (17524436-17964649)    | 27.61 (27.27-27.96) |
| <b>Eastern Mediterranean</b> | Non-exclusive breastfeeding | 2015 | 20599906 (20361046-20857997)    | 25.89 (25.59-26.21) |
| <b>Eastern Mediterranean</b> | Overcrowding                | 2000 | 41157777 (40903211-41408354)    | 64.05 (63.66-64.44) |
| <b>Eastern Mediterranean</b> | Overcrowding                | 2015 | 49120476 (48835717-49408113)    | 61.73 (61.37-62.09) |
| <b>South East Asia</b>       | HIV                         | 2000 | 68003 (41648-103765)            | 0.04 (0.02-0.06)    |
| <b>South East Asia</b>       | HIV                         | 2015 | 70950 (48889-98802)             | 0.04 (0.03-0.06)    |
| <b>South East Asia</b>       | Incomplete immunisation     | 2000 | 67512686 (66790318-68259841)    | 38 (37.6-38.42)     |
| <b>South East Asia</b>       | Incomplete immunisation     | 2015 | 60435075 (59844539-61060421)    | 33.81 (33.47-34.15) |
| <b>South East Asia</b>       | Indoor air pollution        | 2000 | 123930679 (123232981-124588730) | 69.76 (69.37-70.13) |
| <b>South East Asia</b>       | Indoor air pollution        | 2015 | 124716236 (124112463-125342264) | 69.76 (69.42-70.11) |
| <b>South East Asia</b>       | Low birth weight            | 2000 | 17883921 (17443377-18384735)    | 10.07 (9.82-10.35)  |
| <b>South East Asia</b>       | Low birth weight            | 2015 | 25453233 (25007115-25920165)    | 14.24 (13.99-14.5)  |
| <b>South East Asia</b>       | Malnutrition                | 2000 | 75367309 (74615634-76097785)    | 42.42 (42-42.83)    |
| <b>South East Asia</b>       | Malnutrition                | 2015 | 71476697 (70837057-72085927)    | 39.98 (39.62-40.32) |

|                        |                             |      |                              |                     |
|------------------------|-----------------------------|------|------------------------------|---------------------|
| <b>South East Asia</b> | Non-exclusive breastfeeding | 2000 | 29238112 (28846281-29688741) | 16.46 (16.24-16.71) |
| <b>South East Asia</b> | Non-exclusive breastfeeding | 2015 | 38796183 (38292551-39275361) | 21.7 (21.42-21.97)  |
| <b>South East Asia</b> | Overcrowding                | 2000 | 92554939 (91810611-93345362) | 52.1 (51.68-52.54)  |
| <b>South East Asia</b> | Overcrowding                | 2015 | 94744206 (94108902-95400693) | 53 (52.64-53.36)    |
| <b>Western Pacific</b> | HIV                         | 2000 | 41359 (6665-157357)          | 0.04 (0.01-0.14)    |
| <b>Western Pacific</b> | HIV                         | 2015 | 11675 (5997-20460)           | 0.01 (0.01-0.02)    |
| <b>Western Pacific</b> | Incomplete immunisation     | 2000 | 31216717 (29217765-33111860) | 28.12 (26.32-29.82) |
| <b>Western Pacific</b> | Incomplete immunisation     | 2015 | 8618235 (8405198-8835134)    | 7.75 (7.56-7.95)    |
| <b>Western Pacific</b> | Indoor air pollution        | 2000 | 14735869 (14648160-14876786) | 13.27 (13.19-13.4)  |
| <b>Western Pacific</b> | Indoor air pollution        | 2015 | 18623854 (18388328-18851831) | 16.75 (16.54-16.96) |
| <b>Western Pacific</b> | Low birth weight            | 2000 | 9845797 (8567230-11093255)   | 8.87 (7.72-9.99)    |
| <b>Western Pacific</b> | Low birth weight            | 2015 | 5376725 (5212534-5548181)    | 4.84 (4.69-4.99)    |
| <b>Western Pacific</b> | Malnutrition                | 2000 | 51878201 (49559122-54047723) | 46.73 (44.64-48.68) |
| <b>Western Pacific</b> | Malnutrition                | 2015 | 8372293 (8182197-8562801)    | 7.53 (7.36-7.7)     |
| <b>Western Pacific</b> | Non-exclusive breastfeeding | 2000 | 9347775 (8740731-10055203)   | 8.42 (7.87-9.06)    |
| <b>Western Pacific</b> | Non-exclusive breastfeeding | 2015 | 41121550 (40721572-41536390) | 36.99 (36.63-37.36) |
| <b>Western Pacific</b> | Overcrowding                | 2000 | 50033298 (47790734-52380411) | 45.07 (43.05-47.18) |
| <b>Western Pacific</b> | Overcrowding                | 2015 | 11511251 (11279656-11728475) | 10.35 (10.15-10.55) |

Additional care is required in interpreting the results for the Western Pacific region as there was a considerable increase in Countries contributing data to the DHS between 2000 and 2015. Only 2 countries (Cambodia and the Philippines) of the 20 of countries contributing data in 2015 contributed in 2000. This means that the regional comparison was particularly vulnerable to the imputation approached described in the analysis. This was not an issue in the remaining regions where the majority of countries contributing to the DHS survey in the 2015 period also contributed in 2000; the percentages were 86%, 90%, 100% and 100% for the Africa, Americas, Eastern Mediterranean and South-East Asian regions respectively.

Supplementary table 17: Pneumonia deaths among children under-five for 132 low and middle income countries, 2000-2015

| Country                          | Pneumonia deaths among children under-five |       |       |       | Difference between 2000 and 2015 |                     |
|----------------------------------|--------------------------------------------|-------|-------|-------|----------------------------------|---------------------|
|                                  | 2000                                       | 2005  | 2010  | 2015  | Absolute difference              | Relative difference |
| Afghanistan                      | 28942                                      | 29981 | 25105 | 18671 | -10271                           | -35%                |
| Algeria                          | 3723                                       | 3303  | 3117  | 3130  | -592                             | -16%                |
| Angola                           | 30484                                      | 36275 | 34571 | 29502 | -982                             | -3%                 |
| Antigua and Barbuda              | 0                                          | 1     | 0     | 0     | 0                                | 0%                  |
| Argentina                        | 968                                        | 886   | 823   | 708   | -260                             | -27%                |
| Bahamas                          | 19                                         | 9     | 15    | 9     | -10                              | -52%                |
| Bahrain                          | 3                                          | 6     | 7     | 3     | 0                                | 11%                 |
| Bangladesh                       | 62632                                      | 45036 | 25034 | 17352 | -45281                           | -72%                |
| Barbados                         | 0                                          | 3     | 1     | 1     | 1                                | 0%                  |
| Belize                           | 24                                         | 14    | 13    | 11    | -13                              | -53%                |
| Benin                            | 7229                                       | 6413  | 6555  | 5702  | -1528                            | -21%                |
| Bhutan                           | 277                                        | 172   | 114   | 60    | -217                             | -78%                |
| Bolivia (Plurinational State of) | 3728                                       | 2594  | 1903  | 1304  | -2424                            | -65%                |
| Botswana                         | 330                                        | 391   | 429   | 307   | -22                              | -7%                 |
| Brazil                           | 14929                                      | 7549  | 3415  | 4773  | -10156                           | -68%                |
| Burkina Faso                     | 9774                                       | 11872 | 7856  | 7761  | -2013                            | -21%                |
| Burundi                          | 7522                                       | 7086  | 7322  | 5913  | -1609                            | -21%                |
| Cabo Verde                       | 76                                         | 49    | 49    | 37    | -39                              | -52%                |
| Cambodia                         | 7405                                       | 4632  | 2739  | 1694  | -5712                            | -77%                |
| Cameroon                         | 16115                                      | 14747 | 14227 | 11071 | -5045                            | -31%                |
| Central African Republic         | 3135                                       | 2978  | 3420  | 3368  | 233                              | 7%                  |
| Chad                             | 15765                                      | 18810 | 19393 | 19275 | 3511                             | 22%                 |
| Chile                            | 276                                        | 142   | 89    | 67    | -209                             | -76%                |
| China                            | 118092                                     | 60173 | 33332 | 22242 | -95850                           | -81%                |
| Colombia                         | 2631                                       | 1973  | 1372  | 1217  | -1415                            | -54%                |
| Comoros                          | 373                                        | 403   | 330   | 300   | -72                              | -19%                |
| Congo                            | 2202                                       | 2101  | 1407  | 971   | -1232                            | -56%                |

| Country                               | Pneumonia deaths among children under-five |        |        |        | Difference between 2000 and 2015 |                     |
|---------------------------------------|--------------------------------------------|--------|--------|--------|----------------------------------|---------------------|
|                                       | 2000                                       | 2005   | 2010   | 2015   | Absolute difference              | Relative difference |
| Cook Islands                          | 1                                          | 1      | 0      | 0      | -1                               | -81%                |
| Costa Rica                            | 74                                         | 51     | 34     | 33     | -41                              | -56%                |
| Cote d'Ivoire                         | 9279                                       | 8641   | 9323   | 10935  | 1656                             | 18%                 |
| Democratic People's Republic of Korea | 4637                                       | 2146   | 1854   | 1383   | -3254                            | -70%                |
| Democratic Republic of the Congo      | 41587                                      | 38820  | 44934  | 46226  | 4639                             | 11%                 |
| Djibouti                              | 367                                        | 325    | 235    | 184    | -183                             | -50%                |
| Dominica                              | 0                                          | 1      | 0      | 1      | 0                                | 84%                 |
| Dominican Republic                    | 1164                                       | 884    | 782    | 700    | -464                             | -40%                |
| Ecuador                               | 1573                                       | 1153   | 1059   | 861    | -712                             | -45%                |
| Egypt                                 | 15545                                      | 10894  | 8216   | 8375   | -7170                            | -46%                |
| El Salvador                           | 835                                        | 456    | 301    | 215    | -620                             | -74%                |
| Equatorial Guinea                     | 485                                        | 381    | 463    | 418    | -67                              | -14%                |
| Eritrea                               | 2402                                       | 2388   | 1824   | 1551   | -851                             | -35%                |
| Ethiopia                              | 86397                                      | 68880  | 44478  | 31427  | -54971                           | -64%                |
| Fiji                                  | 53                                         | 51     | 57     | 47     | -6                               | -10%                |
| Gabon                                 | 397                                        | 445    | 396    | 355    | -42                              | -11%                |
| Gambia                                | 998                                        | 977    | 836    | 766    | -232                             | -23%                |
| Ghana                                 | 7923                                       | 8013   | 7740   | 6450   | -1472                            | -19%                |
| Grenada                               | 3                                          | 2      | 1      | 2      | -2                               | -52%                |
| Guatemala                             | 4456                                       | 3190   | 2566   | 2146   | -2309                            | -52%                |
| Guinea                                | 8732                                       | 8403   | 7050   | 7008   | -1724                            | -20%                |
| Guinea-Bissau                         | 1523                                       | 1591   | 1178   | 1028   | -495                             | -33%                |
| Guyana                                | 74                                         | 52     | 31     | 44     | -30                              | -40%                |
| Haiti                                 | 6537                                       | 5412   | 6037   | 4021   | -2516                            | -38%                |
| Honduras                              | 1156                                       | 753    | 539    | 372    | -784                             | -68%                |
| India                                 | 481539                                     | 371044 | 270948 | 178994 | -302545                          | -63%                |
| Indonesia                             | 44917                                      | 34851  | 27372  | 25000  | -19918                           | -44%                |
| Iran (Islamic Republic of)            | 7320                                       | 4644   | 3877   | 3098   | -4222                            | -58%                |

| Country                          | Pneumonia deaths among children under-five |       |       |       | Difference between 2000 and 2015 |                     |
|----------------------------------|--------------------------------------------|-------|-------|-------|----------------------------------|---------------------|
|                                  | 2000                                       | 2005  | 2010  | 2015  | Absolute difference              | Relative difference |
| Iraq                             | 6354                                       | 6191  | 6648  | 5874  | -480                             | -8%                 |
| Jamaica                          | 68                                         | 56    | 56    | 41    | -27                              | -40%                |
| Jordan                           | 481                                        | 359   | 347   | 327   | -155                             | -32%                |
| Kenya                            | 21276                                      | 17415 | 14681 | 10507 | -10769                           | -51%                |
| Kiribati                         | 37                                         | 27    | 38    | 27    | -10                              | -26%                |
| Kuwait                           | 35                                         | 23    | 41    | 56    | 21                               | 60%                 |
| Lao People's Democratic Republic | 4314                                       | 3748  | 2989  | 2006  | -2308                            | -54%                |
| Lebanon                          | 132                                        | 75    | 33    | 46    | -85                              | -65%                |
| Lesotho                          | 1086                                       | 1078  | 942   | 955   | -130                             | -12%                |
| Liberia                          | 2845                                       | 2492  | 2242  | 1737  | -1108                            | -39%                |
| Libya                            | 369                                        | 278   | 187   | 127   | -242                             | -66%                |
| Madagascar                       | 15968                                      | 12599 | 9220  | 6951  | -9017                            | -56%                |
| Malawi                           | 13366                                      | 7975  | 7031  | 5416  | -7950                            | -59%                |
| Malaysia                         | 484                                        | 271   | 204   | 185   | -299                             | -62%                |
| Maldives                         | 45                                         | 18    | 9     | 5     | -41                              | -89%                |
| Mali                             | 17781                                      | 16339 | 15731 | 10766 | -7015                            | -39%                |
| Marshall Islands                 | 15                                         | 13    | 10    | 8     | -7                               | -47%                |
| Mauritania                       | 2162                                       | 2438  | 2169  | 1616  | -546                             | -25%                |
| Mauritius                        | 13                                         | 21    | 21    | 21    | 8                                | 65%                 |
| Mexico                           | 10458                                      | 6895  | 4877  | 3459  | -6999                            | -67%                |
| Micronesia (Federated States of) | 29                                         | 22    | 15    | 12    | -17                              | -58%                |
| Mongolia                         | 594                                        | 361   | 288   | 236   | -358                             | -60%                |
| Morocco                          | 5299                                       | 3834  | 2864  | 2246  | -3052                            | -58%                |
| Mozambique                       | 17254                                      | 17590 | 14809 | 11757 | -5497                            | -32%                |
| Myanmar                          | 17745                                      | 15336 | 11019 | 7516  | -10230                           | -58%                |
| Namibia                          | 659                                        | 661   | 596   | 618   | -41                              | -6%                 |
| Nauru                            | 1                                          | 1     | 1     | 1     | 0                                | -39%                |
| Nepal                            | 12038                                      | 8004  | 5208  | 2946  | -9092                            | -76%                |

| Country                          | Pneumonia deaths among children under-five |        |        |        | Difference between 2000 and 2015 |                     |
|----------------------------------|--------------------------------------------|--------|--------|--------|----------------------------------|---------------------|
|                                  | 2000                                       | 2005   | 2010   | 2015   | Absolute difference              | Relative difference |
| Nicaragua                        | 993                                        | 693    | 574    | 431    | -563                             | -57%                |
| Niger                            | 25830                                      | 25072  | 19325  | 18290  | -7541                            | -29%                |
| Nigeria                          | 145231                                     | 149071 | 157059 | 133239 | -11992                           | -8%                 |
| Niue                             | 0                                          | 0      | 0      | 0      | 0                                | -24%                |
| Oman                             | 102                                        | 57     | 55     | 60     | -41                              | -41%                |
| Pakistan                         | 93923                                      | 84850  | 78094  | 63960  | -29963                           | -32%                |
| Palau                            | 1                                          | 1      | 0      | 0      | 0                                | -44%                |
| Panama                           | 185                                        | 194    | 228    | 170    | -15                              | -8%                 |
| Papua New Guinea                 | 2300                                       | 2516   | 2264   | 1934   | -366                             | -16%                |
| Paraguay                         | 705                                        | 488    | 401    | 305    | -400                             | -57%                |
| Peru                             | 3952                                       | 2199   | 1487   | 1076   | -2876                            | -73%                |
| Philippines                      | 19200                                      | 17475  | 15141  | 12224  | -6976                            | -36%                |
| Qatar                            | 8                                          | 6      | 7      | 9      | 1                                | 17%                 |
| Republic of Korea                | 188                                        | 77     | 59     | 39     | -149                             | -79%                |
| Rwanda                           | 12710                                      | 6657   | 3573   | 1929   | -10781                           | -85%                |
| Saint Kitts and Nevis            | 1                                          | 0      | 0      | 0      | -1                               | -100%               |
| Saint Lucia                      | 2                                          | 3      | 3      | 2      | 0                                | 1%                  |
| Saint Vincent and the Grenadines | 2                                          | 1      | 2      | 2      | 0                                | 1%                  |
| Samoa                            | 15                                         | 11     | 10     | 8      | -7                               | -47%                |
| Sao Tome and Principe            | 72                                         | 59     | 44     | 35     | -37                              | -52%                |
| Saudi Arabia                     | 1284                                       | 857    | 675    | 491    | -793                             | -62%                |
| Senegal                          | 9729                                       | 8264   | 5567   | 3984   | -5745                            | -59%                |
| Seychelles                       | 1                                          | 1      | 1      | 1      | 0                                | -9%                 |
| Sierra Leone                     | 5914                                       | 6766   | 4864   | 3714   | -2199                            | -37%                |
| Solomon Islands                  | 75                                         | 86     | 95     | 85     | 10                               | 14%                 |
| Somalia                          | 12480                                      | 14883  | 17018  | 14669  | 2189                             | 18%                 |
| South Africa                     | 12851                                      | 10431  | 10521  | 7105   | -5746                            | -45%                |
| Sri Lanka                        | 550                                        | 426    | 264    | 193    | -357                             | -65%                |

| Country                            | Pneumonia deaths among children under-five |       |       |       | Difference between 2000 and 2015 |                     |
|------------------------------------|--------------------------------------------|-------|-------|-------|----------------------------------|---------------------|
|                                    | 2000                                       | 2005  | 2010  | 2015  | Absolute difference              | Relative difference |
| Sudan                              | 24491                                      | 24467 | 20654 | 15551 | -8940                            | -37%                |
| Suriname                           | 31                                         | 24    | 22    | 16    | -15                              | -47%                |
| Swaziland                          | 696                                        | 721   | 517   | 354   | -342                             | -49%                |
| Syrian Arab Republic               | 1749                                       | 1017  | 806   | 427   | -1322                            | -76%                |
| Thailand                           | 2651                                       | 1725  | 1149  | 843   | -1808                            | -68%                |
| Timor-Leste                        | 972                                        | 584   | 460   | 550   | -422                             | -43%                |
| Togo                               | 2831                                       | 2857  | 2716  | 2962  | 131                              | 5%                  |
| Tonga                              | 6                                          | 5     | 5     | 5     | -1                               | -18%                |
| Trinidad and Tobago                | 17                                         | 43    | 36    | 30    | 13                               | 76%                 |
| Tunisia                            | 822                                        | 451   | 331   | 234   | -589                             | -72%                |
| Tuvalu                             | 2                                          | 1     | 1     | 1     | -1                               | -66%                |
| Uganda                             | 22161                                      | 19172 | 16025 | 13659 | -8502                            | -38%                |
| United Arab Emirates               | 31                                         | 27    | 33    | 25    | -5                               | -17%                |
| United Republic of Tanzania        | 31096                                      | 27617 | 19171 | 14322 | -16773                           | -54%                |
| Uruguay                            | 79                                         | 73    | 53    | 31    | -48                              | -61%                |
| Vanuatu                            | 26                                         | 25    | 32    | 26    | 0                                | -1%                 |
| Venezuela (Bolivarian Republic of) | 1014                                       | 1051  | 1047  | 965   | -49                              | -5%                 |
| Viet Nam                           | 8603                                       | 7754  | 5685  | 4808  | -3795                            | -44%                |
| Yemen                              | 14202                                      | 10937 | 8027  | 5373  | -8830                            | -62%                |
| Zambia                             | 12365                                      | 8815  | 8202  | 6020  | -6345                            | -51%                |
| Zimbabwe                           | 5108                                       | 6570  | 6847  | 5582  | 474                              | 9%                  |



Supplementary table 18: Pneumonia mortality among children under-five for 132 low and middle income countries, 2000-2015

| Country                          | Pneumonia mortality among children under-five |      |      |      | Difference between 2000 and 2015 |                     |                        |
|----------------------------------|-----------------------------------------------|------|------|------|----------------------------------|---------------------|------------------------|
|                                  | 2000                                          | 2005 | 2010 | 2015 | Absolute difference              | Relative difference | Annual Rate of Change* |
| Afghanistan                      | 30.8                                          | 28.4 | 23.0 | 18.3 | -12.5                            | -41%                | 3.5                    |
| Algeria                          | 6.6                                           | 5.0  | 3.4  | 3.3  | -3.3                             | -50%                | 4.6                    |
| Angola                           | 41.3                                          | 41.9 | 34.9 | 27.0 | -14.3                            | -35%                | 2.8                    |
| Antigua and Barbuda              | 0.0                                           | 0.6  | 0.3  | 0.3  | 0.3                              | 0%                  | 0.0                    |
| Argentina                        | 1.4                                           | 1.2  | 1.1  | 0.9  | -0.5                             | -34%                | 2.7                    |
| Bahamas                          | 3.7                                           | 1.6  | 2.3  | 1.6  | -2.1                             | -57%                | 5.7                    |
| Bahrain                          | 0.2                                           | 0.4  | 0.4  | 0.1  | -0.1                             | -35%                | 2.9                    |
| Bangladesh                       | 17.3                                          | 12.9 | 7.9  | 5.4  | -11.8                            | -69%                | 7.7                    |
| Barbados                         | 0.0                                           | 0.8  | 0.4  | 0.3  | 0.3                              | 0%                  | 0.0                    |
| Belize                           | 3.1                                           | 1.9  | 1.7  | 1.4  | -1.8                             | -57%                | 5.6                    |
| Benin                            | 25.3                                          | 19.9 | 18.7 | 15.2 | -10.1                            | -40%                | 3.4                    |
| Bhutan                           | 17.5                                          | 11.7 | 7.5  | 4.9  | -12.6                            | -72%                | 8.5                    |
| Bolivia (Plurinational State of) | 14.7                                          | 10.4 | 7.6  | 5.3  | -9.4                             | -64%                | 6.8                    |
| Botswana                         | 7.0                                           | 8.4  | 8.3  | 5.3  | -1.7                             | -24%                | 1.9                    |
| Brazil                           | 3.9                                           | 2.2  | 1.2  | 1.5  | -2.4                             | -62%                | 6.5                    |
| Burkina Faso                     | 19.0                                          | 20.5 | 12.2 | 11.3 | -7.7                             | -41%                | 3.5                    |
| Burundi                          | 27.2                                          | 21.8 | 17.9 | 12.8 | -14.4                            | -53%                | 5.0                    |
| Cabo Verde                       | 6.0                                           | 4.4  | 4.3  | 3.4  | -2.7                             | -44%                | 3.9                    |
| Cambodia                         | 23.8                                          | 13.6 | 7.2  | 4.7  | -19.1                            | -80%                | 10.8                   |
| Cameroon                         | 25.6                                          | 20.7 | 18.6 | 13.5 | -12.1                            | -47%                | 4.3                    |
| Central African Republic         | 21.7                                          | 20.5 | 23.2 | 20.5 | -1.1                             | -5%                 | 0.4                    |
| Chad                             | 38.9                                          | 39.5 | 35.9 | 31.8 | -7.1                             | -18%                | 1.3                    |

\* For formula see p2155 of the - Li Liu, Hope L. Johnson, Simon Cousens, Jamie Perin, Susana Scott, Joy Lawn, Igor Rudan, Harry Campbell, Richard Cibulskis, Mengying Li, Colin Mathers, and Robert E. Black, for the Child Health Epidemiology Reference Group (CHERG) of WHO and UNICEF. 2012. "Global, regional, and national causes of child mortality: an updated systematic analysis for 2010 with time trends since 2000". Lancet. 379: 2151-61.

| Country                               | Pneumonia mortality among children under-five |      |      |      | Difference between 2000 and 2015 |                     |                        |
|---------------------------------------|-----------------------------------------------|------|------|------|----------------------------------|---------------------|------------------------|
|                                       | 2000                                          | 2005 | 2010 | 2015 | Absolute difference              | Relative difference | Annual Rate of Change* |
| Chile                                 | 1.1                                           | 0.6  | 0.4  | 0.3  | -0.8                             | -73%                | 8.8                    |
| China                                 | 7.6                                           | 3.5  | 2.1  | 1.3  | -6.2                             | -83%                | 11.7                   |
| Colombia                              | 3.2                                           | 2.3  | 1.8  | 1.6  | -1.6                             | -49%                | 4.5                    |
| Comoros                               | 18.3                                          | 18.3 | 13.6 | 11.5 | -6.9                             | -37%                | 3.1                    |
| Congo                                 | 18.8                                          | 16.1 | 9.4  | 5.9  | -12.9                            | -68%                | 7.7                    |
| Cook Islands                          | 1.8                                           | 1.8  | 0.8  | 0.4  | -1.4                             | -78%                | 10.1                   |
| Costa Rica                            | 0.9                                           | 0.7  | 0.5  | 0.5  | -0.5                             | -49%                | 4.5                    |
| Cote d'Ivoire                         | 14.0                                          | 12.6 | 12.6 | 13.2 | -0.8                             | -6%                 | 0.4                    |
| Democratic People's Republic of Korea | 11.9                                          | 5.6  | 5.6  | 3.7  | -8.3                             | -69%                | 7.9                    |
| Democratic Republic of the Congo      | 19.3                                          | 15.5 | 16.0 | 14.8 | -4.6                             | -24%                | 1.8                    |
| Djibouti                              | 16.8                                          | 14.5 | 11.1 | 8.3  | -8.5                             | -50%                | 4.7                    |
| Dominica                              | 0.5                                           | 0.8  | 0.1  | 0.8  | 0.4                              | 76%                 | -3.8                   |
| Dominican Republic                    | 5.6                                           | 3.9  | 3.6  | 3.2  | -2.4                             | -43%                | 3.7                    |
| Ecuador                               | 5.0                                           | 3.7  | 3.2  | 2.6  | -2.4                             | -47%                | 4.3                    |
| Egypt                                 | 9.1                                           | 5.6  | 4.1  | 3.0  | -6.1                             | -67%                | 7.4                    |
| El Salvador                           | 6.0                                           | 3.9  | 2.6  | 2.1  | -3.9                             | -66%                | 7.1                    |
| Equatorial Guinea                     | 23.6                                          | 16.9 | 17.7 | 14.7 | -9.0                             | -38%                | 3.2                    |
| Eritrea                               | 19.4                                          | 15.1 | 10.8 | 9.3  | -10.0                            | -52%                | 4.9                    |
| Ethiopia                              | 29.6                                          | 23.6 | 15.0 | 10.0 | -19.6                            | -66%                | 7.3                    |
| Fiji                                  | 2.7                                           | 2.6  | 2.9  | 2.8  | 0.1                              | 2%                  | -0.1                   |
| Gabon                                 | 9.9                                           | 10.6 | 8.3  | 6.9  | -3.0                             | -30%                | 2.4                    |
| Gambia                                | 18.4                                          | 15.7 | 11.7 | 9.3  | -9.1                             | -50%                | 4.6                    |
| Ghana                                 | 12.7                                          | 11.1 | 9.8  | 7.2  | -5.5                             | -43%                | 3.8                    |
| Grenada                               | 1.5                                           | 1.3  | 0.4  | 0.8  | -0.7                             | -46%                | 4.1                    |
| Guatemala                             | 11.2                                          | 7.8  | 6.3  | 4.8  | -6.4                             | -57%                | 5.6                    |
| Guinea                                | 24.2                                          | 22.1 | 17.1 | 15.4 | -8.9                             | -37%                | 3.0                    |

| Country                          | Pneumonia mortality among children under-five |      |      |      | Difference between 2000 and 2015 |                     |                        |
|----------------------------------|-----------------------------------------------|------|------|------|----------------------------------|---------------------|------------------------|
|                                  | 2000                                          | 2005 | 2010 | 2015 | Absolute difference              | Relative difference | Annual Rate of Change* |
| Guinea-Bissau                    | 29.8                                          | 28.8 | 19.7 | 15.8 | -14.0                            | -47%                | 4.2                    |
| Guyana                           | 4.0                                           | 3.4  | 2.8  | 2.6  | -1.4                             | -35%                | 2.9                    |
| Haiti                            | 24.6                                          | 20.8 | 22.1 | 15.6 | -8.9                             | -36%                | 3.0                    |
| Honduras                         | 5.9                                           | 4.1  | 3.1  | 2.3  | -3.6                             | -61%                | 6.3                    |
| India                            | 17.3                                          | 13.5 | 10.2 | 7.1  | -10.2                            | -59%                | 5.9                    |
| Indonesia                        | 10.3                                          | 7.8  | 5.9  | 4.6  | -5.8                             | -56%                | 5.4                    |
| Iran (Islamic Republic of)       | 5.7                                           | 3.8  | 2.8  | 2.3  | -3.4                             | -60%                | 6.1                    |
| Iraq                             | 7.5                                           | 6.9  | 6.0  | 4.8  | -2.7                             | -36%                | 3.0                    |
| Jamaica                          | 1.2                                           | 1.2  | 1.2  | 1.0  | -0.2                             | -13%                | 0.9                    |
| Jordan                           | 3.2                                           | 2.4  | 1.9  | 1.6  | -1.6                             | -51%                | 4.7                    |
| Kenya                            | 18.2                                          | 13.0 | 10.2 | 6.9  | -11.3                            | -62%                | 6.5                    |
| Kiribati                         | 14.2                                          | 15.3 | 10.4 | 9.5  | -4.7                             | -33%                | 2.7                    |
| Kuwait                           | 0.8                                           | 0.5  | 0.6  | 0.8  | 0.0                              | 6%                  | -0.4                   |
| Lao People's Democratic Republic | 26.8                                          | 23.0 | 16.2 | 11.6 | -15.2                            | -57%                | 5.6                    |
| Lebanon                          | 2.2                                           | 1.2  | 0.7  | 0.5  | -1.7                             | -79%                | 10.4                   |
| Lesotho                          | 18.4                                          | 20.9 | 16.6 | 15.3 | -3.1                             | -17%                | 1.2                    |
| Liberia                          | 23.5                                          | 19.5 | 15.7 | 11.5 | -12.0                            | -51%                | 4.8                    |
| Libya                            | 3.1                                           | 2.2  | 1.3  | 1.0  | -2.1                             | -67%                | 7.4                    |
| Madagascar                       | 24.8                                          | 18.9 | 12.6 | 8.5  | -16.3                            | -66%                | 7.2                    |
| Malawi                           | 28.2                                          | 15.6 | 11.7 | 8.6  | -19.6                            | -69%                | 7.9                    |
| Malaysia                         | 0.9                                           | 0.6  | 0.5  | 0.3  | -0.5                             | -62%                | 6.4                    |
| Maldives                         | 7.3                                           | 2.8  | 1.2  | 0.6  | -6.7                             | -92%                | 16.5                   |
| Mali                             | 35.1                                          | 27.7 | 23.1 | 14.8 | -20.2                            | -58%                | 5.7                    |
| Marshall Islands                 | 6.9                                           | 6.8  | 6.3  | 6.0  | -0.8                             | -12%                | 0.9                    |
| Mauritania                       | 21.4                                          | 21.5 | 17.6 | 12.3 | -9.1                             | -43%                | 3.7                    |
| Mauritius                        | 0.7                                           | 1.0  | 1.5  | 1.5  | 0.7                              | 96%                 | -4.5                   |

| Country                          | Pneumonia mortality among children under-five |      |      |      | Difference between 2000 and 2015 |                     |                        |
|----------------------------------|-----------------------------------------------|------|------|------|----------------------------------|---------------------|------------------------|
|                                  | 2000                                          | 2005 | 2010 | 2015 | Absolute difference              | Relative difference | Annual Rate of Change* |
| Mexico                           | 4.2                                           | 2.9  | 2.1  | 1.5  | -2.7                             | -65%                | 7.0                    |
| Micronesia (Federated States of) | 9.0                                           | 8.1  | 6.0  | 5.1  | -3.9                             | -44%                | 3.8                    |
| Mongolia                         | 12.4                                          | 7.5  | 4.3  | 3.3  | -9.1                             | -73%                | 8.8                    |
| Morocco                          | 8.7                                           | 6.3  | 4.1  | 3.1  | -5.6                             | -64%                | 6.8                    |
| Mozambique                       | 21.7                                          | 19.8 | 15.2 | 11.1 | -10.6                            | -49%                | 4.5                    |
| Myanmar                          | 15.3                                          | 13.2 | 11.2 | 8.2  | -7.1                             | -47%                | 4.2                    |
| Namibia                          | 11.6                                          | 11.3 | 9.3  | 8.3  | -3.3                             | -28%                | 2.2                    |
| Nauru                            | 6.8                                           | 6.5  | 4.9  | 4.7  | -2.0                             | -30%                | 2.4                    |
| Nepal                            | 15.7                                          | 11.7 | 8.2  | 5.3  | -10.3                            | -66%                | 7.2                    |
| Nicaragua                        | 7.3                                           | 5.4  | 4.4  | 3.6  | -3.7                             | -51%                | 4.7                    |
| Niger                            | 45.1                                          | 37.6 | 24.4 | 19.2 | -25.9                            | -57%                | 5.7                    |
| Nigeria                          | 28.8                                          | 26.1 | 24.9 | 19.0 | -9.7                             | -34%                | 2.8                    |
| Niue                             | 6.5                                           | 0.9  | 6.9  | 5.5  | -1.1                             | -17%                | 1.2                    |
| Oman                             | 1.9                                           | 1.1  | 0.8  | 0.7  | -1.1                             | -60%                | 6.1                    |
| Pakistan                         | 21.0                                          | 19.7 | 14.8 | 11.9 | -9.1                             | -43%                | 3.8                    |
| Palau                            | 2.6                                           | 2.1  | 2.1  | 1.2  | -1.4                             | -53%                | 5.0                    |
| Panama                           | 2.5                                           | 2.9  | 3.0  | 2.3  | -0.3                             | -11%                | 0.8                    |
| Papua New Guinea                 | 12.3                                          | 13.2 | 10.9 | 9.2  | -3.1                             | -25%                | 1.9                    |
| Paraguay                         | 4.8                                           | 3.8  | 2.8  | 2.3  | -2.5                             | -53%                | 5.0                    |
| Peru                             | 6.5                                           | 3.6  | 2.5  | 1.7  | -4.7                             | -73%                | 8.8                    |
| Philippines                      | 8.4                                           | 7.3  | 6.7  | 5.2  | -3.2                             | -38%                | 3.2                    |
| Qatar                            | 0.6                                           | 0.5  | 0.4  | 0.3  | -0.3                             | -51%                | 4.7                    |
| Republic of Korea                | 0.4                                           | 0.2  | 0.1  | 0.1  | -0.3                             | -77%                | 9.7                    |
| Rwanda                           | 36.0                                          | 20.7 | 9.6  | 5.7  | -30.3                            | -84%                | 12.3                   |
| Saint Kitts and Nevis            | 0.5                                           | 0.3  | 0.2  | 0.0  | -0.5                             | -100%               | 0.0                    |
| Saint Lucia                      | 0.7                                           | 1.1  | 1.1  | 0.8  | 0.1                              | 9%                  | -0.6                   |

| Country                          | Pneumonia mortality among children under-five |      |      |      | Difference between 2000 and 2015 |                     |                        |
|----------------------------------|-----------------------------------------------|------|------|------|----------------------------------|---------------------|------------------------|
|                                  | 2000                                          | 2005 | 2010 | 2015 | Absolute difference              | Relative difference | Annual Rate of Change* |
| Saint Vincent and the Grenadines | 0.7                                           | 0.5  | 0.8  | 1.0  | 0.2                              | 33%                 | -1.9                   |
| Samoa                            | 2.9                                           | 2.0  | 1.8  | 1.7  | -1.2                             | -40%                | 3.4                    |
| Sao Tome and Principe            | 13.7                                          | 10.4 | 7.6  | 5.5  | -8.2                             | -60%                | 6.1                    |
| Saudi Arabia                     | 2.2                                           | 1.5  | 1.1  | 0.8  | -1.5                             | -65%                | 6.9                    |
| Senegal                          | 25.5                                          | 19.0 | 11.4 | 6.9  | -18.6                            | -73%                | 8.7                    |
| Seychelles                       | 0.9                                           | 0.8  | 0.6  | 0.7  | -0.2                             | -23%                | 1.7                    |
| Sierra Leone                     | 34.1                                          | 32.7 | 22.0 | 17.0 | -17.0                            | -50%                | 4.6                    |
| Solomon Islands                  | 5.4                                           | 5.5  | 5.6  | 5.1  | -0.3                             | -6%                 | 0.4                    |
| Somalia                          | 34.9                                          | 39.9 | 39.4 | 32.9 | -2.0                             | -6%                 | 0.4                    |
| South Africa                     | 11.0                                          | 10.1 | 8.5  | 7.0  | -4.0                             | -36%                | 3.0                    |
| Sri Lanka                        | 1.6                                           | 1.1  | 0.7  | 0.6  | -1.0                             | -62%                | 6.5                    |
| Sudan                            | 22.7                                          | 20.5 | 16.9 | 12.0 | -10.7                            | -47%                | 4.2                    |
| Suriname                         | 2.8                                           | 2.4  | 2.2  | 1.6  | -1.2                             | -42%                | 3.6                    |
| Swaziland                        | 21.0                                          | 21.2 | 14.2 | 9.7  | -11.3                            | -54%                | 5.2                    |
| Syrian Arab Republic             | 3.3                                           | 2.2  | 1.5  | 1.0  | -2.3                             | -70%                | 8.0                    |
| Thailand                         | 3.0                                           | 2.0  | 1.5  | 1.1  | -1.8                             | -61%                | 6.4                    |
| Timor-Leste                      | 24.6                                          | 18.4 | 15.3 | 10.6 | -14.0                            | -57%                | 5.6                    |
| Togo                             | 15.2                                          | 13.3 | 11.5 | 11.8 | -3.4                             | -22%                | 1.7                    |
| Tonga                            | 2.3                                           | 1.8  | 1.9  | 1.8  | -0.4                             | -18%                | 1.3                    |
| Trinidad and Tobago              | 0.9                                           | 2.1  | 1.8  | 1.6  | 0.7                              | 72%                 | -3.6                   |
| Tunisia                          | 4.9                                           | 2.7  | 1.8  | 1.1  | -3.8                             | -77%                | 9.8                    |
| Tuvalu                           | 7.6                                           | 5.9  | 3.9  | 3.5  | -4.1                             | -54%                | 5.2                    |
| Uganda                           | 20.3                                          | 15.0 | 11.2 | 8.6  | -11.7                            | -58%                | 5.7                    |
| United Arab Emirates             | 0.6                                           | 0.4  | 0.4  | 0.3  | -0.3                             | -57%                | 5.6                    |
| United Republic of Tanzania      | 23.2                                          | 17.1 | 10.7 | 7.0  | -16.2                            | -70%                | 8.0                    |
| Uruguay                          | 1.5                                           | 1.4  | 1.1  | 0.6  | -0.9                             | -57%                | 5.7                    |

| Country                            | Pneumonia mortality among children under-five |      |      |      | Difference between 2000 and 2015 |                     |                        |
|------------------------------------|-----------------------------------------------|------|------|------|----------------------------------|---------------------|------------------------|
|                                    | 2000                                          | 2005 | 2010 | 2015 | Absolute difference              | Relative difference | Annual Rate of Change* |
| Vanuatu                            | 4.4                                           | 4.1  | 4.1  | 3.9  | -0.5                             | -12%                | 0.9                    |
| Venezuela (Bolivarian Republic of) | 1.7                                           | 1.8  | 1.8  | 1.6  | -0.1                             | -8%                 | 0.6                    |
| Viet Nam                           | 7.3                                           | 5.1  | 3.7  | 3.1  | -4.2                             | -58%                | 5.8                    |
| Yemen                              | 22.0                                          | 14.5 | 10.0 | 6.5  | -15.5                            | -70%                | 8.1                    |
| Zambia                             | 27.6                                          | 17.4 | 14.4 | 9.8  | -17.8                            | -65%                | 6.9                    |
| Zimbabwe                           | 13.0                                          | 15.2 | 13.7 | 10.2 | -2.8                             | -21%                | 1.6                    |

Supplementary table 19: Pneumonia deaths among children under-five for all countries and selected regions, 2000-2015

| Level   | Country                     | Pneumonia deaths among children under-five |         |         |        |
|---------|-----------------------------|--------------------------------------------|---------|---------|--------|
|         |                             | 2000                                       | 2005    | 2010    | 2015   |
| Region  | Low income region*          | 442418                                     | 397618  | 336014  | 281143 |
|         | Middle income region*       | 1291163                                    | 1032085 | 833061  | 636871 |
|         | Developing countries        | 1694792                                    | 1401246 | 1146196 | 898291 |
|         | Africa <sup>#</sup>         | 645206                                     | 602249  | 547266  | 463098 |
|         | Southeast Asia <sup>#</sup> | 628004                                     | 479342  | 343430  | 234841 |
| Country | Afghanistan                 | 28942                                      | 29981   | 25105   | 18671  |
|         | Angola                      | 30484                                      | 36275   | 34571   | 29502  |
|         | Albania                     | 266                                        | 135     | 72      | 74     |
|         | Andorra                     | 0                                          | 0       | 0       | 0      |
|         | United Arab Emirates        | 31                                         | 27      | 33      | 25     |
|         | Argentina                   | 968                                        | 886     | 823     | 708    |
|         | Armenia                     | 218                                        | 170     | 106     | 62     |
|         | Antigua and Barbuda         | 0                                          | 1       | 0       | 0      |
|         | Australia                   | 40                                         | 42      | 42      | 31     |
|         | Austria                     | 8                                          | 1       | 6       | 4      |
|         | Azerbaijan                  | 1877                                       | 1182    | 1041    | 881    |
|         | Burundi                     | 7522                                       | 7086    | 7322    | 5913   |
|         | Belgium                     | 8                                          | 18      | 15      | 9      |
|         | Benin                       | 7229                                       | 6413    | 6555    | 5702   |
|         | Burkina Faso                | 9774                                       | 11872   | 7856    | 7761   |
|         | Bangladesh                  | 62632                                      | 45036   | 25034   | 17352  |
|         | Bulgaria                    | 290                                        | 219     | 195     | 108    |
|         | Bahrain                     | 3                                          | 6       | 7       | 3      |
|         | Bahamas                     | 19                                         | 9       | 15      | 9      |
|         | Bosnia and Herzegovina      | 35                                         | 17      | 19      | 9      |
|         | Belarus                     | 181                                        | 96      | 50      | 34     |
|         | Belize                      | 24                                         | 14      | 13      | 11     |

| Level | Country                          | Pneumonia deaths among children under-five |       |       |       |
|-------|----------------------------------|--------------------------------------------|-------|-------|-------|
|       |                                  | 2000                                       | 2005  | 2010  | 2015  |
|       | Bolivia (Plurinational State of) | 3728                                       | 2594  | 1903  | 1304  |
|       | Brazil                           | 14929                                      | 7549  | 3415  | 4773  |
|       | Barbados                         | 0                                          | 3     | 1     | 1     |
|       | Brunei Darussalam                | 3                                          | 3     | 3     | 3     |
|       | Bhutan                           | 277                                        | 172   | 114   | 60    |
|       | Botswana                         | 330                                        | 391   | 429   | 307   |
|       | Central African Republic         | 3135                                       | 2978  | 3420  | 3368  |
|       | Canada                           | 52                                         | 40    | 43    | 38    |
|       | Switzerland                      | 6                                          | 8     | 7     | 4     |
|       | Chile                            | 276                                        | 142   | 89    | 67    |
|       | China                            | 118092                                     | 60173 | 33332 | 22242 |
|       | Cote d'Ivoire                    | 9279                                       | 8641  | 9323  | 10935 |
|       | Cameroon                         | 16115                                      | 14747 | 14227 | 11071 |
|       | Democratic Republic of the Congo | 41587                                      | 38820 | 44934 | 46226 |
|       | Congo                            | 2202                                       | 2101  | 1407  | 971   |
|       | Cook Islands                     | 1                                          | 1     | 0     | 0     |
|       | Colombia                         | 2631                                       | 1973  | 1372  | 1217  |
|       | Comoros                          | 373                                        | 403   | 330   | 300   |
|       | Cabo Verde                       | 76                                         | 49    | 49    | 37    |
|       | Costa Rica                       | 74                                         | 51    | 34    | 33    |
|       | Cuba                             | 81                                         | 88    | 75    | 72    |
|       | Cyprus                           | 4                                          | 2     | 1     | 1     |
|       | Czech Republic                   | 21                                         | 24    | 36    | 20    |
|       | Germany                          | 74                                         | 68    | 41    | 47    |
|       | Djibouti                         | 367                                        | 325   | 235   | 184   |
|       | Dominica                         | 0                                          | 1     | 0     | 1     |
|       | Denmark                          | 9                                          | 7     | 3     | 2     |
|       | Dominican Republic               | 1164                                       | 884   | 782   | 700   |



| Level | Country                          | Pneumonia deaths among children under-five |       |       |       |
|-------|----------------------------------|--------------------------------------------|-------|-------|-------|
|       |                                  | 2000                                       | 2005  | 2010  | 2015  |
|       | Algeria                          | 3723                                       | 3303  | 3117  | 3130  |
|       | Ecuador                          | 1573                                       | 1153  | 1059  | 861   |
|       | Egypt                            | 15545                                      | 10894 | 8216  | 8375  |
|       | Eritrea                          | 2402                                       | 2388  | 1824  | 1551  |
|       | Spain                            | 49                                         | 39    | 43    | 23    |
|       | Estonia                          | 10                                         | 4     | 6     | 2     |
|       | Ethiopia                         | 86397                                      | 68880 | 44478 | 31427 |
|       | Finland                          | 4                                          | 6     | 6     | 3     |
|       | Fiji                             | 53                                         | 51    | 57    | 47    |
|       | France                           | 61                                         | 65    | 59    | 60    |
|       | Micronesia (Federated States of) | 29                                         | 22    | 15    | 12    |
|       | Gabon                            | 397                                        | 445   | 396   | 355   |
|       | United Kingdom                   | 185                                        | 167   | 178   | 123   |
|       | Georgia                          | 329                                        | 189   | 104   | 54    |
|       | Ghana                            | 7923                                       | 8013  | 7740  | 6450  |
|       | Guinea                           | 8732                                       | 8403  | 7050  | 7008  |
|       | Gambia                           | 998                                        | 977   | 836   | 766   |
|       | Guinea-Bissau                    | 1523                                       | 1591  | 1178  | 1028  |
|       | Equatorial Guinea                | 485                                        | 381   | 463   | 418   |
|       | Greece                           | 24                                         | 32    | 17    | 16    |
|       | Grenada                          | 3                                          | 2     | 1     | 2     |
|       | Guatemala                        | 4456                                       | 3190  | 2566  | 2146  |
|       | Guyana                           | 74                                         | 52    | 31    | 44    |
|       | Honduras                         | 1156                                       | 753   | 539   | 372   |
|       | Croatia                          | 24                                         | 15    | 8     | 4     |
|       | Haiti                            | 6537                                       | 5412  | 6037  | 4021  |
|       | Hungary                          | 70                                         | 55    | 25    | 26    |
|       | Indonesia                        | 44917                                      | 34851 | 27372 | 25000 |

| Level | Country                          | Pneumonia deaths among children under-five |        |        |        |
|-------|----------------------------------|--------------------------------------------|--------|--------|--------|
|       |                                  | 2000                                       | 2005   | 2010   | 2015   |
|       | India                            | 481539                                     | 371044 | 270948 | 178994 |
|       | Ireland                          | 13                                         | 12     | 13     | 5      |
|       | Iran (Islamic Republic of)       | 7320                                       | 4644   | 3877   | 3098   |
|       | Iraq                             | 6354                                       | 6191   | 6648   | 5874   |
|       | Iceland                          | 0                                          | 0      | 0      | 0      |
|       | Israel                           | 15                                         | 24     | 9      | 12     |
|       | Italy                            | 53                                         | 38     | 27     | 25     |
|       | Jamaica                          | 68                                         | 56     | 56     | 41     |
|       | Jordan                           | 481                                        | 359    | 347    | 327    |
|       | Japan                            | 357                                        | 279    | 224    | 185    |
|       | Kazakhstan                       | 1687                                       | 1574   | 1151   | 726    |
|       | Kenya                            | 21276                                      | 17415  | 14681  | 10507  |
|       | Kyrgyzstan                       | 992                                        | 701    | 591    | 509    |
|       | Cambodia                         | 7405                                       | 4632   | 2739   | 1694   |
|       | Kiribati                         | 37                                         | 27     | 38     | 27     |
|       | Saint Kitts and Nevis            | 1                                          | 0      | 0      | 0      |
|       | Republic of Korea                | 188                                        | 77     | 59     | 39     |
|       | Kuwait                           | 35                                         | 23     | 41     | 56     |
|       | Lao People's Democratic Republic | 4314                                       | 3748   | 2989   | 2006   |
|       | Lebanon                          | 132                                        | 75     | 33     | 46     |
|       | Liberia                          | 2845                                       | 2492   | 2242   | 1737   |
|       | Libya                            | 369                                        | 278    | 187    | 127    |
|       | Saint Lucia                      | 2                                          | 3      | 3      | 2      |
|       | Sri Lanka                        | 550                                        | 426    | 264    | 193    |
|       | Lesotho                          | 1086                                       | 1078   | 942    | 955    |
|       | Lithuania                        | 37                                         | 29     | 6      | 10     |
|       | Luxembourg                       | 0                                          | 0      | 0      | 0      |
|       | Latvia                           | 15                                         | 23     | 7      | 5      |

| Level | Country                                   | Pneumonia deaths among children under-five |        |        |        |
|-------|-------------------------------------------|--------------------------------------------|--------|--------|--------|
|       |                                           | 2000                                       | 2005   | 2010   | 2015   |
|       | Morocco                                   | 5299                                       | 3834   | 2864   | 2246   |
|       | Monaco                                    | 0                                          | 0      | 0      | 0      |
|       | Republic of Moldova                       | 393                                        | 229    | 145    | 108    |
|       | Madagascar                                | 15968                                      | 12599  | 9220   | 6951   |
|       | Maldives                                  | 45                                         | 18     | 9      | 5      |
|       | Mexico                                    | 10458                                      | 6895   | 4877   | 3459   |
|       | Marshall Islands                          | 15                                         | 13     | 10     | 8      |
|       | The former Yugoslav Republic of Macedonia | 34                                         | 23     | 15     | 8      |
|       | Mali                                      | 17781                                      | 16339  | 15731  | 10766  |
|       | Malta                                     | 1                                          | 1      | 0      | 1      |
|       | Myanmar                                   | 17745                                      | 15336  | 11019  | 7516   |
|       | Montenegro                                | 3                                          | 4      | 2      | 1      |
|       | Mongolia                                  | 594                                        | 361    | 288    | 236    |
|       | Mozambique                                | 17254                                      | 17590  | 14809  | 11757  |
|       | Mauritania                                | 2162                                       | 2438   | 2169   | 1616   |
|       | Mauritius                                 | 13                                         | 21     | 21     | 21     |
|       | Malawi                                    | 13366                                      | 7975   | 7031   | 5416   |
|       | Malaysia                                  | 484                                        | 271    | 204    | 185    |
|       | Namibia                                   | 659                                        | 661    | 596    | 618    |
|       | Niger                                     | 25830                                      | 25072  | 19325  | 18290  |
|       | Nigeria                                   | 145231                                     | 149071 | 157059 | 133239 |
|       | Nicaragua                                 | 993                                        | 693    | 574    | 431    |
|       | Niue                                      | 0                                          | 0      | 0      | 0      |
|       | Netherlands                               | 28                                         | 25     | 22     | 13     |
|       | Norway                                    | 10                                         | 7      | 3      | 3      |
|       | Nepal                                     | 12038                                      | 8004   | 5208   | 2946   |
|       | Nauru                                     | 1                                          | 1      | 1      | 1      |
|       | New Zealand                               | 23                                         | 25     | 24     | 22     |

| Level | Country                               | Pneumonia deaths among children under-five |       |       |       |
|-------|---------------------------------------|--------------------------------------------|-------|-------|-------|
|       |                                       | 2000                                       | 2005  | 2010  | 2015  |
|       | Oman                                  | 102                                        | 57    | 55    | 60    |
|       | Pakistan                              | 93923                                      | 84850 | 78094 | 63960 |
|       | Panama                                | 185                                        | 194   | 228   | 170   |
|       | Peru                                  | 3952                                       | 2199  | 1487  | 1076  |
|       | Philippines                           | 19200                                      | 17475 | 15141 | 12224 |
|       | Palau                                 | 1                                          | 1     | 0     | 0     |
|       | Papua New Guinea                      | 2300                                       | 2516  | 2264  | 1934  |
|       | Poland                                | 167                                        | 128   | 110   | 85    |
|       | Democratic People's Republic of Korea | 4637                                       | 2146  | 1854  | 1383  |
|       | Portugal                              | 29                                         | 19    | 7     | 6     |
|       | Paraguay                              | 705                                        | 488   | 401   | 305   |
|       | Qatar                                 | 8                                          | 6     | 7     | 9     |
|       | Romania                               | 2186                                       | 1190  | 865   | 526   |
|       | Russian Federation                    | 4632                                       | 2725  | 1615  | 1290  |
|       | Rwanda                                | 12710                                      | 6657  | 3573  | 1929  |
|       | Saudi Arabia                          | 1284                                       | 857   | 675   | 491   |
|       | Sudan                                 | 24491                                      | 24467 | 20654 | 15551 |
|       | Senegal                               | 9729                                       | 8264  | 5567  | 3984  |
|       | Singapore                             | 16                                         | 26    | 11    | 20    |
|       | Solomon Islands                       | 75                                         | 86    | 95    | 85    |
|       | Sierra Leone                          | 5914                                       | 6766  | 4864  | 3714  |
|       | El Salvador                           | 835                                        | 456   | 301   | 215   |
|       | San Marino                            | 0                                          | 0     | 0     | 0     |
|       | Somalia                               | 12480                                      | 14883 | 17018 | 14669 |
|       | Serbia                                | 86                                         | 55    | 30    | 30    |
|       | South Sudan                           | 9754                                       | 8600  | 8493  | 8058  |
|       | Sao Tome and Principe                 | 72                                         | 59    | 44    | 35    |
|       | Suriname                              | 31                                         | 24    | 22    | 16    |

| Level | Country                            | Pneumonia deaths among children under-five |       |       |       |
|-------|------------------------------------|--------------------------------------------|-------|-------|-------|
|       |                                    | 2000                                       | 2005  | 2010  | 2015  |
|       | Slovakia                           | 68                                         | 52    | 34    | 35    |
|       | Slovenia                           | 0                                          | 1     | 2     | 1     |
|       | Sweden                             | 6                                          | 10    | 11    | 14    |
|       | Swaziland                          | 696                                        | 721   | 517   | 354   |
|       | Seychelles                         | 1                                          | 1     | 1     | 1     |
|       | Syrian Arab Republic               | 1749                                       | 1017  | 806   | 427   |
|       | Chad                               | 15765                                      | 18810 | 19393 | 19275 |
|       | Togo                               | 2831                                       | 2857  | 2716  | 2962  |
|       | Thailand                           | 2651                                       | 1725  | 1149  | 843   |
|       | Tajikistan                         | 4031                                       | 2508  | 2100  | 2048  |
|       | Turkmenistan                       | 1621                                       | 1689  | 1138  | 983   |
|       | Timor-Leste                        | 972                                        | 584   | 460   | 550   |
|       | Tonga                              | 6                                          | 5     | 5     | 5     |
|       | Trinidad and Tobago                | 17                                         | 43    | 36    | 30    |
|       | Tunisia                            | 822                                        | 451   | 331   | 234   |
|       | Turkey                             | 4489                                       | 2440  | 1030  | 725   |
|       | Tuvalu                             | 2                                          | 1     | 1     | 1     |
|       | United Republic of Tanzania        | 31096                                      | 27617 | 19171 | 14322 |
|       | Uganda                             | 22161                                      | 19172 | 16025 | 13659 |
|       | Ukraine                            | 1111                                       | 660   | 601   | 331   |
|       | Uruguay                            | 79                                         | 73    | 53    | 31    |
|       | United States of America           | 988                                        | 1018  | 832   | 675   |
|       | Uzbekistan                         | 6539                                       | 5293  | 4515  | 3909  |
|       | Saint Vincent and the Grenadines   | 2                                          | 1     | 2     | 2     |
|       | Venezuela (Bolivarian Republic of) | 1014                                       | 1051  | 1047  | 965   |
|       | Viet Nam                           | 8603                                       | 7754  | 5685  | 4808  |
|       | Vanuatu                            | 26                                         | 25    | 32    | 26    |
|       | Samoa                              | 15                                         | 11    | 10    | 8     |

| Level | Country      | Pneumonia deaths among children under-five |       |       |      |
|-------|--------------|--------------------------------------------|-------|-------|------|
|       |              | 2000                                       | 2005  | 2010  | 2015 |
|       | Yemen        | 14202                                      | 10937 | 8027  | 5373 |
|       | South Africa | 12851                                      | 10431 | 10521 | 7105 |
|       | Zambia       | 12365                                      | 8815  | 8202  | 6020 |
|       | Zimbabwe     | 5108                                       | 6570  | 6847  | 5582 |

\* World Bank region, # WHO region

Supplementary table 20: Pneumonia mortality among children under-five for all countries and selected regions, 2000-2015

| Level   | Country                     | Pneumonia deaths among children under-five |      |      |      |
|---------|-----------------------------|--------------------------------------------|------|------|------|
|         |                             | 2000                                       | 2005 | 2010 | 2015 |
| Region  | Low income region*          | 25.5                                       | 21.0 | 16.2 | 12.6 |
|         | Middle income region*       | 13.1                                       | 10.2 | 8.2  | 6.1  |
|         | Developing countries        | 15.2                                       | 12.1 | 9.7  | 7.4  |
|         | Africa <sup>#</sup>         | 24.6                                       | 20.8 | 16.9 | 13.2 |
|         | Southeast Asia <sup>#</sup> | 15.9                                       | 12.3 | 9.1  | 6.4  |
| Country | Afghanistan                 | 30.8                                       | 28.4 | 23.0 | 18.3 |
|         | Angola                      | 41.3                                       | 41.9 | 34.9 | 27.0 |
|         | Albania                     | 5.1                                        | 3.4  | 2.2  | 1.6  |
|         | Andorra                     | 0.1                                        | 0.2  | 0.1  | 0.1  |
|         | United Arab Emirates        | 0.6                                        | 0.4  | 0.4  | 0.3  |
|         | Argentina                   | 1.4                                        | 1.2  | 1.1  | 0.9  |
|         | Armenia                     | 6.2                                        | 3.7  | 2.3  | 1.5  |
|         | Antigua and Barbuda         | 0.0                                        | 0.6  | 0.3  | 0.3  |
|         | Australia                   | 0.2                                        | 0.2  | 0.1  | 0.1  |
|         | Austria                     | 0.1                                        | 0.0  | 0.1  | 0.1  |
|         | Azerbaijan                  | 15.0                                       | 9.0  | 6.3  | 3.8  |
|         | Burundi                     | 27.2                                       | 21.8 | 17.9 | 12.8 |
|         | Belgium                     | 0.1                                        | 0.1  | 0.1  | 0.1  |
|         | Benin                       | 25.3                                       | 19.9 | 18.7 | 15.2 |
|         | Burkina Faso                | 19.0                                       | 20.5 | 12.2 | 11.3 |
|         | Bangladesh                  | 17.3                                       | 12.9 | 7.9  | 5.4  |
|         | Bulgaria                    | 4.4                                        | 3.3  | 2.5  | 1.8  |
|         | Bahrain                     | 0.2                                        | 0.4  | 0.4  | 0.1  |
|         | Bahamas                     | 3.7                                        | 1.6  | 2.3  | 1.6  |
|         | Bosnia and Herzegovina      | 0.7                                        | 0.7  | 0.4  | 0.3  |
|         | Belarus                     | 2.0                                        | 1.0  | 0.5  | 0.3  |
|         | Belize                      | 3.1                                        | 1.9  | 1.7  | 1.4  |

| Level | Country                          | Pneumonia deaths among children under-five |      |      |      |
|-------|----------------------------------|--------------------------------------------|------|------|------|
|       |                                  | 2000                                       | 2005 | 2010 | 2015 |
|       | Bolivia (Plurinational State of) | 14.7                                       | 10.4 | 7.6  | 5.3  |
|       | Brazil                           | 3.9                                        | 2.2  | 1.2  | 1.5  |
|       | Barbados                         | 0.0                                        | 0.8  | 0.4  | 0.3  |
|       | Brunei Darussalam                | 0.5                                        | 0.4  | 0.5  | 0.4  |
|       | Bhutan                           | 17.5                                       | 11.7 | 7.5  | 4.9  |
|       | Botswana                         | 7.0                                        | 8.4  | 8.3  | 5.3  |
|       | Central African Republic         | 21.7                                       | 20.5 | 23.2 | 20.5 |
|       | Canada                           | 0.2                                        | 0.1  | 0.1  | 0.1  |
|       | Switzerland                      | 0.1                                        | 0.1  | 0.1  | 0.0  |
|       | Chile                            | 1.1                                        | 0.6  | 0.4  | 0.3  |
|       | China                            | 7.6                                        | 3.5  | 2.1  | 1.3  |
|       | Cote d'Ivoire                    | 14.0                                       | 12.6 | 12.6 | 13.2 |
|       | Cameroon                         | 25.6                                       | 20.7 | 18.6 | 13.5 |
|       | Democratic Republic of the Congo | 19.3                                       | 15.5 | 16.0 | 14.8 |
|       | Congo                            | 18.8                                       | 16.1 | 9.4  | 5.9  |
|       | Cook Islands                     | 1.8                                        | 1.8  | 0.8  | 0.4  |
|       | Colombia                         | 3.2                                        | 2.3  | 1.8  | 1.6  |
|       | Comoros                          | 18.3                                       | 18.3 | 13.6 | 11.5 |
|       | Cabo Verde                       | 6.0                                        | 4.4  | 4.3  | 3.4  |
|       | Costa Rica                       | 0.9                                        | 0.7  | 0.5  | 0.5  |
|       | Cuba                             | 0.5                                        | 0.7  | 0.6  | 0.6  |
|       | Cyprus                           | 0.4                                        | 0.2  | 0.1  | 0.1  |
|       | Czech Republic                   | 0.3                                        | 0.2  | 0.3  | 0.2  |
|       | Germany                          | 0.1                                        | 0.1  | 0.1  | 0.1  |
|       | Djibouti                         | 16.8                                       | 14.5 | 11.1 | 8.3  |
|       | Dominica                         | 0.5                                        | 0.8  | 0.1  | 0.8  |
|       | Denmark                          | 0.1                                        | 0.1  | 0.0  | 0.0  |
|       | Dominican Republic               | 5.6                                        | 3.9  | 3.6  | 3.2  |



| Level | Country                          | Pneumonia deaths among children under-five |      |      |      |
|-------|----------------------------------|--------------------------------------------|------|------|------|
|       |                                  | 2000                                       | 2005 | 2010 | 2015 |
|       | Algeria                          | 6.6                                        | 5.0  | 3.4  | 3.3  |
|       | Ecuador                          | 5.0                                        | 3.7  | 3.2  | 2.6  |
|       | Egypt                            | 9.1                                        | 5.6  | 4.1  | 3.0  |
|       | Eritrea                          | 19.4                                       | 15.1 | 10.8 | 9.3  |
|       | Spain                            | 0.1                                        | 0.1  | 0.1  | 0.1  |
|       | Estonia                          | 0.8                                        | 0.3  | 0.3  | 0.2  |
|       | Ethiopia                         | 29.6                                       | 23.6 | 15.0 | 10.0 |
|       | Finland                          | 0.1                                        | 0.1  | 0.1  | 0.1  |
|       | Fiji                             | 2.7                                        | 2.6  | 2.9  | 2.8  |
|       | France                           | 0.1                                        | 0.1  | 0.1  | 0.1  |
|       | Micronesia (Federated States of) | 9.0                                        | 8.1  | 6.0  | 5.1  |
|       | Gabon                            | 9.9                                        | 10.6 | 8.3  | 6.9  |
|       | United Kingdom                   | 0.3                                        | 0.2  | 0.2  | 0.2  |
|       | Georgia                          | 6.4                                        | 3.3  | 1.6  | 1.0  |
|       | Ghana                            | 12.7                                       | 11.1 | 9.8  | 7.2  |
|       | Guinea                           | 24.2                                       | 22.1 | 17.1 | 15.4 |
|       | Gambia                           | 18.4                                       | 15.7 | 11.7 | 9.3  |
|       | Guinea-Bissau                    | 29.8                                       | 28.8 | 19.7 | 15.8 |
|       | Equatorial Guinea                | 23.6                                       | 16.9 | 17.7 | 14.7 |
|       | Greece                           | 0.2                                        | 0.3  | 0.1  | 0.2  |
|       | Grenada                          | 1.5                                        | 1.3  | 0.4  | 0.8  |
|       | Guatemala                        | 11.2                                       | 7.8  | 6.3  | 4.8  |
|       | Guyana                           | 4.0                                        | 3.4  | 2.8  | 2.6  |
|       | Honduras                         | 5.9                                        | 4.1  | 3.1  | 2.3  |
|       | Croatia                          | 0.4                                        | 0.4  | 0.2  | 0.1  |
|       | Haiti                            | 24.6                                       | 20.8 | 22.1 | 15.6 |
|       | Hungary                          | 0.8                                        | 0.5  | 0.3  | 0.3  |
|       | Indonesia                        | 10.3                                       | 7.8  | 5.9  | 4.6  |

| Level | Country                          | Pneumonia deaths among children under-five |      |      |      |
|-------|----------------------------------|--------------------------------------------|------|------|------|
|       |                                  | 2000                                       | 2005 | 2010 | 2015 |
|       | India                            | 17.3                                       | 13.5 | 10.2 | 7.1  |
|       | Ireland                          | 0.2                                        | 0.2  | 0.2  | 0.1  |
|       | Iran (Islamic Republic of)       | 5.7                                        | 3.8  | 2.8  | 2.3  |
|       | Iraq                             | 7.5                                        | 6.9  | 6.0  | 4.8  |
|       | Iceland                          | 0.0                                        | 0.1  | 0.0  | 0.0  |
|       | Israel                           | 0.1                                        | 0.2  | 0.1  | 0.1  |
|       | Italy                            | 0.1                                        | 0.1  | 0.0  | 0.1  |
|       | Jamaica                          | 1.2                                        | 1.2  | 1.2  | 1.0  |
|       | Jordan                           | 3.2                                        | 2.4  | 1.9  | 1.6  |
|       | Japan                            | 0.3                                        | 0.3  | 0.2  | 0.2  |
|       | Kazakhstan                       | 8.0                                        | 5.4  | 3.1  | 1.9  |
|       | Kenya                            | 18.2                                       | 13.0 | 10.2 | 6.9  |
|       | Kyrgyzstan                       | 9.1                                        | 6.7  | 4.1  | 3.0  |
|       | Cambodia                         | 23.8                                       | 13.6 | 7.2  | 4.7  |
|       | Kiribati                         | 14.2                                       | 15.3 | 10.4 | 9.5  |
|       | Saint Kitts and Nevis            | 0.5                                        | 0.3  | 0.2  | 0.0  |
|       | Republic of Korea                | 0.4                                        | 0.2  | 0.1  | 0.1  |
|       | Kuwait                           | 0.8                                        | 0.5  | 0.6  | 0.8  |
|       | Lao People's Democratic Republic | 26.8                                       | 23.0 | 16.2 | 11.6 |
|       | Lebanon                          | 2.2                                        | 1.2  | 0.7  | 0.5  |
|       | Liberia                          | 23.5                                       | 19.5 | 15.7 | 11.5 |
|       | Libya                            | 3.1                                        | 2.2  | 1.3  | 1.0  |
|       | Saint Lucia                      | 0.7                                        | 1.1  | 1.1  | 0.8  |
|       | Sri Lanka                        | 1.6                                        | 1.1  | 0.7  | 0.6  |
|       | Lesotho                          | 18.4                                       | 20.9 | 16.6 | 15.3 |
|       | Lithuania                        | 1.1                                        | 0.9  | 0.2  | 0.3  |
|       | Luxembourg                       | 0.0                                        | 0.0  | 0.0  | 0.0  |
|       | Latvia                           | 0.8                                        | 0.9  | 0.3  | 0.3  |

| Level | Country                                   | Pneumonia deaths among children under-five |      |      |      |
|-------|-------------------------------------------|--------------------------------------------|------|------|------|
|       |                                           | 2000                                       | 2005 | 2010 | 2015 |
|       | Morocco                                   | 8.7                                        | 6.3  | 4.1  | 3.1  |
|       | Monaco                                    | 0.0                                        | 0.0  | 0.3  | 0.1  |
|       | Republic of Moldova                       | 8.3                                        | 5.4  | 3.1  | 2.5  |
|       | Madagascar                                | 24.8                                       | 18.9 | 12.6 | 8.5  |
|       | Maldives                                  | 7.3                                        | 2.8  | 1.2  | 0.6  |
|       | Mexico                                    | 4.2                                        | 2.9  | 2.1  | 1.5  |
|       | Marshall Islands                          | 6.9                                        | 6.8  | 6.3  | 6.0  |
|       | The former Yugoslav Republic of Macedonia | 1.3                                        | 0.9  | 0.7  | 0.3  |
|       | Mali                                      | 35.1                                       | 27.7 | 23.1 | 14.8 |
|       | Malta                                     | 0.1                                        | 0.3  | 0.0  | 0.1  |
|       | Myanmar                                   | 15.3                                       | 13.2 | 11.2 | 8.2  |
|       | Montenegro                                | 0.3                                        | 0.5  | 0.3  | 0.2  |
|       | Mongolia                                  | 12.4                                       | 7.5  | 4.3  | 3.3  |
|       | Mozambique                                | 21.7                                       | 19.8 | 15.2 | 11.1 |
|       | Mauritania                                | 21.4                                       | 21.5 | 17.6 | 12.3 |
|       | Mauritius                                 | 0.7                                        | 1.0  | 1.5  | 1.5  |
|       | Malawi                                    | 28.2                                       | 15.6 | 11.7 | 8.6  |
|       | Malaysia                                  | 0.9                                        | 0.6  | 0.5  | 0.3  |
|       | Namibia                                   | 11.6                                       | 11.3 | 9.3  | 8.3  |
|       | Niger                                     | 45.1                                       | 37.6 | 24.4 | 19.2 |
|       | Nigeria                                   | 28.8                                       | 26.1 | 24.9 | 19.0 |
|       | Nicaragua                                 | 7.3                                        | 5.4  | 4.4  | 3.6  |
|       | Niue                                      | 6.5                                        | 0.9  | 6.9  | 5.5  |
|       | Netherlands                               | 0.1                                        | 0.1  | 0.1  | 0.1  |
|       | Norway                                    | 0.2                                        | 0.1  | 0.0  | 0.1  |
|       | Nepal                                     | 15.7                                       | 11.7 | 8.2  | 5.3  |
|       | Nauru                                     | 6.8                                        | 6.5  | 4.9  | 4.7  |
|       | New Zealand                               | 0.4                                        | 0.4  | 0.4  | 0.4  |

| Level | Country                               | Pneumonia deaths among children under-five |      |      |      |
|-------|---------------------------------------|--------------------------------------------|------|------|------|
|       |                                       | 2000                                       | 2005 | 2010 | 2015 |
|       | Oman                                  | 1.9                                        | 1.1  | 0.8  | 0.7  |
|       | Pakistan                              | 21.0                                       | 19.7 | 14.8 | 11.9 |
|       | Panama                                | 2.5                                        | 2.9  | 3.0  | 2.3  |
|       | Peru                                  | 6.5                                        | 3.6  | 2.5  | 1.7  |
|       | Philippines                           | 8.4                                        | 7.3  | 6.7  | 5.2  |
|       | Palau                                 | 2.6                                        | 2.1  | 2.1  | 1.2  |
|       | Papua New Guinea                      | 12.3                                       | 13.2 | 10.9 | 9.2  |
|       | Poland                                | 0.5                                        | 0.4  | 0.2  | 0.2  |
|       | Democratic People's Republic of Korea | 11.9                                       | 5.6  | 5.6  | 3.7  |
|       | Portugal                              | 0.3                                        | 0.2  | 0.1  | 0.1  |
|       | Paraguay                              | 4.8                                        | 3.8  | 2.8  | 2.3  |
|       | Qatar                                 | 0.6                                        | 0.5  | 0.4  | 0.3  |
|       | Romania                               | 8.2                                        | 5.8  | 4.0  | 3.2  |
|       | Russian Federation                    | 3.1                                        | 1.8  | 1.0  | 0.7  |
|       | Rwanda                                | 36.0                                       | 20.7 | 9.6  | 5.7  |
|       | Saudi Arabia                          | 2.2                                        | 1.5  | 1.1  | 0.8  |
|       | Sudan                                 | 22.7                                       | 20.5 | 16.9 | 12.0 |
|       | Senegal                               | 25.5                                       | 19.0 | 11.4 | 6.9  |
|       | Singapore                             | 0.4                                        | 0.6  | 0.2  | 0.4  |
|       | Solomon Islands                       | 5.4                                        | 5.5  | 5.6  | 5.1  |
|       | Sierra Leone                          | 34.1                                       | 32.7 | 22.0 | 17.0 |
|       | El Salvador                           | 6.0                                        | 3.9  | 2.6  | 2.1  |
|       | San Marino                            | 0.3                                        | 0.1  | 0.1  | 0.1  |
|       | Somalia                               | 34.9                                       | 39.9 | 39.4 | 32.9 |
|       | Serbia                                | 0.7                                        | 0.6  | 0.3  | 0.3  |
|       | South Sudan                           | 34.6                                       | 27.6 | 22.6 | 18.6 |
|       | Sao Tome and Principe                 | 13.7                                       | 10.4 | 7.6  | 5.5  |
|       | Suriname                              | 2.8                                        | 2.4  | 2.2  | 1.6  |

| Level | Country                            | Pneumonia deaths among children under-five |      |      |      |
|-------|------------------------------------|--------------------------------------------|------|------|------|
|       |                                    | 2000                                       | 2005 | 2010 | 2015 |
|       | Slovakia                           | 1.4                                        | 0.9  | 0.6  | 0.6  |
|       | Slovenia                           | 0.0                                        | 0.0  | 0.1  | 0.1  |
|       | Sweden                             | 0.1                                        | 0.1  | 0.1  | 0.1  |
|       | Swaziland                          | 21.0                                       | 21.2 | 14.2 | 9.7  |
|       | Seychelles                         | 0.9                                        | 0.8  | 0.6  | 0.7  |
|       | Syrian Arab Republic               | 3.3                                        | 2.2  | 1.5  | 1.0  |
|       | Chad                               | 38.9                                       | 39.5 | 35.9 | 31.8 |
|       | Togo                               | 15.2                                       | 13.3 | 11.5 | 11.8 |
|       | Thailand                           | 3.0                                        | 2.0  | 1.5  | 1.1  |
|       | Tajikistan                         | 21.1                                       | 14.1 | 9.1  | 7.6  |
|       | Turkmenistan                       | 18.1                                       | 13.9 | 11.3 | 8.6  |
|       | Timor-Leste                        | 24.6                                       | 18.4 | 15.3 | 10.6 |
|       | Tonga                              | 2.3                                        | 1.8  | 1.9  | 1.8  |
|       | Trinidad and Tobago                | 0.9                                        | 2.1  | 1.8  | 1.6  |
|       | Tunisia                            | 4.9                                        | 2.7  | 1.8  | 1.1  |
|       | Turkey                             | 3.2                                        | 1.9  | 0.8  | 0.5  |
|       | Tuvalu                             | 7.6                                        | 5.9  | 3.9  | 3.5  |
|       | United Republic of Tanzania        | 23.2                                       | 17.1 | 10.7 | 7.0  |
|       | Uganda                             | 20.3                                       | 15.0 | 11.2 | 8.6  |
|       | Ukraine                            | 2.8                                        | 1.6  | 1.0  | 0.8  |
|       | Uruguay                            | 1.5                                        | 1.4  | 1.1  | 0.6  |
|       | United States of America           | 0.3                                        | 0.2  | 0.2  | 0.2  |
|       | Uzbekistan                         | 12.1                                       | 9.8  | 6.8  | 5.8  |
|       | Saint Vincent and the Grenadines   | 0.7                                        | 0.5  | 0.8  | 1.0  |
|       | Venezuela (Bolivarian Republic of) | 1.7                                        | 1.8  | 1.8  | 1.6  |
|       | Viet Nam                           | 7.3                                        | 5.1  | 3.7  | 3.1  |
|       | Vanuatu                            | 4.4                                        | 4.1  | 4.1  | 3.9  |
|       | Samoa                              | 2.9                                        | 2.0  | 1.8  | 1.7  |

| Level | Country      | Pneumonia deaths among children under-five |      |      |      |
|-------|--------------|--------------------------------------------|------|------|------|
|       |              | 2000                                       | 2005 | 2010 | 2015 |
|       | Yemen        | 22.0                                       | 14.5 | 10.0 | 6.5  |
|       | South Africa | 11.0                                       | 10.1 | 8.5  | 7.0  |
|       | Zambia       | 27.6                                       | 17.4 | 14.4 | 9.8  |
|       | Zimbabwe     | 13.0                                       | 15.2 | 13.7 | 10.2 |

\* World Bank region, # WHO region

Supplementary table 21: Pneumonia-specific mortality and number of deaths due to pneumonia among children under-five, assuming no Hib/PCV coverage, in 2000 and 2015

| Country                          | Pneumonia mortality among children under-five (per 1,000 livebirths) |      | Pneumonia deaths among children under-five |       |
|----------------------------------|----------------------------------------------------------------------|------|--------------------------------------------|-------|
|                                  | 2000                                                                 | 2015 | 2000                                       | 2015  |
| Afghanistan                      | 30.8                                                                 | 22.1 | 28942                                      | 22608 |
| Angola                           | 41.3                                                                 | 35.5 | 30484                                      | 38768 |
| Albania                          | 5.1                                                                  | 2.3  | 266                                        | 102   |
| Andorra                          | 0.1                                                                  | 0.1  | 0                                          | 0     |
| United Arab Emirates             | 0.7                                                                  | 0.4  | 37                                         | 38    |
| Argentina                        | 1.6                                                                  | 1.3  | 1112                                       | 1011  |
| Armenia                          | 6.2                                                                  | 1.7  | 218                                        | 71    |
| Antigua and Barbuda              | 0.0                                                                  | 0.3  | 0                                          | 0     |
| Australia                        | 0.2                                                                  | 0.2  | 46                                         | 47    |
| Austria                          | 0.1                                                                  | 0.1  | 8                                          | 5     |
| Azerbaijan                       | 15.0                                                                 | 4.9  | 1877                                       | 1143  |
| Burundi                          | 27.2                                                                 | 18.2 | 7522                                       | 8431  |
| Belgium                          | 0.1                                                                  | 0.1  | 9                                          | 12    |
| Benin                            | 25.3                                                                 | 19.7 | 7229                                       | 7424  |
| Burkina Faso                     | 19.0                                                                 | 16.2 | 9774                                       | 11097 |
| Bangladesh                       | 17.3                                                                 | 6.2  | 62632                                      | 19778 |
| Bulgaria                         | 4.4                                                                  | 2.5  | 290                                        | 152   |
| Bahrain                          | 0.3                                                                  | 0.2  | 4                                          | 5     |
| Bahamas                          | 4.1                                                                  | 2.3  | 21                                         | 13    |
| Bosnia and Herzegovina           | 0.7                                                                  | 0.3  | 35                                         | 9     |
| Belarus                          | 2.0                                                                  | 0.3  | 181                                        | 36    |
| Belize                           | 3.1                                                                  | 1.6  | 24                                         | 13    |
| Bolivia (Plurinational State of) | 16.7                                                                 | 6.9  | 4236                                       | 1705  |
| Brazil                           | 4.5                                                                  | 2.1  | 17187                                      | 6888  |
| Barbados                         | 0.0                                                                  | 0.5  | 0                                          | 2     |
| Brunei Darussalam                | 0.5                                                                  | 0.4  | 3                                          | 3     |
| Bhutan                           | 17.5                                                                 | 5.7  | 277                                        | 71    |
| Botswana                         | 7.0                                                                  | 7.3  | 330                                        | 423   |
| Central African Republic         | 21.7                                                                 | 24.0 | 3135                                       | 3940  |
| Canada                           | 0.2                                                                  | 0.1  | 60                                         | 55    |
| Switzerland                      | 0.1                                                                  | 0.1  | 7                                          | 5     |
| Chile                            | 1.3                                                                  | 0.4  | 321                                        | 91    |
| China                            | 7.6                                                                  | 1.3  | 118092                                     | 22242 |
| Cote d'Ivoire                    | 14.0                                                                 | 14.7 | 9279                                       | 12209 |
| Cameroon                         | 25.6                                                                 | 19.1 | 16115                                      | 15655 |
| Democratic Republic of the Congo | 19.3                                                                 | 19.0 | 41587                                      | 59358 |
| Congo                            | 18.8                                                                 | 8.0  | 2202                                       | 1308  |
| Cook Islands                     | 1.8                                                                  | 0.5  | 1                                          | 0     |

|                                  |      |      |        |        |
|----------------------------------|------|------|--------|--------|
| Colombia                         | 3.6  | 2.3  | 2911   | 1688   |
| Comoros                          | 18.3 | 12.7 | 373    | 333    |
| Cabo Verde                       | 6.0  | 3.9  | 76     | 43     |
| Costa Rica                       | 1.1  | 0.6  | 86     | 43     |
| Cuba                             | 0.6  | 0.7  | 92     | 82     |
| Cyprus                           | 0.4  | 0.1  | 5      | 1      |
| Czech Republic                   | 0.3  | 0.2  | 21     | 23     |
| Germany                          | 0.1  | 0.1  | 87     | 66     |
| Djibouti                         | 16.8 | 10.8 | 367    | 239    |
| Dominica                         | 0.5  | 1.0  | 0      | 1      |
| Denmark                          | 0.2  | 0.1  | 10     | 3      |
| Dominican Republic               | 5.6  | 3.8  | 1164   | 823    |
| Algeria                          | 6.6  | 3.8  | 3723   | 3630   |
| Ecuador                          | 5.0  | 3.6  | 1573   | 1191   |
| Egypt                            | 9.1  | 3.0  | 15545  | 8375   |
| Eritrea                          | 19.4 | 10.8 | 2402   | 1799   |
| Spain                            | 0.1  | 0.1  | 55     | 26     |
| Estonia                          | 0.8  | 0.2  | 10     | 2      |
| Ethiopia                         | 29.6 | 12.5 | 86397  | 39430  |
| Finland                          | 0.1  | 0.1  | 5      | 5      |
| Fiji                             | 3.1  | 3.9  | 61     | 67     |
| France                           | 0.1  | 0.1  | 70     | 89     |
| Micronesia (Federated States of) | 10.1 | 6.3  | 33     | 15     |
| Gabon                            | 9.9  | 7.7  | 397    | 398    |
| United Kingdom                   | 0.3  | 0.2  | 210    | 176    |
| Georgia                          | 6.4  | 1.1  | 329    | 62     |
| Ghana                            | 12.7 | 10.3 | 7923   | 9267   |
| Guinea                           | 24.2 | 16.7 | 8732   | 7617   |
| Gambia                           | 21.4 | 13.3 | 1161   | 1098   |
| Guinea-Bissau                    | 29.8 | 17.9 | 1523   | 1165   |
| Equatorial Guinea                | 23.6 | 15.2 | 485    | 435    |
| Greece                           | 0.3  | 0.2  | 27     | 26     |
| Grenada                          | 1.6  | 0.9  | 3      | 2      |
| Guatemala                        | 11.2 | 6.0  | 4456   | 2679   |
| Guyana                           | 4.0  | 3.5  | 74     | 60     |
| Honduras                         | 7.0  | 3.2  | 1360   | 524    |
| Croatia                          | 0.4  | 0.1  | 24     | 5      |
| Haiti                            | 24.6 | 16.8 | 6537   | 4325   |
| Hungary                          | 1.0  | 0.4  | 82     | 37     |
| Indonesia                        | 10.3 | 4.7  | 44917  | 25806  |
| India                            | 17.6 | 7.7  | 490274 | 193883 |
| Ireland                          | 0.2  | 0.1  | 14     | 6      |
| Iran (Islamic Republic of)       | 5.7  | 2.3  | 7320   | 3098   |
| Iraq                             | 7.5  | 5.3  | 6354   | 6473   |
| Iceland                          | 0.0  | 0.0  | 0      | 0      |
| Israel                           | 0.1  | 0.1  | 17     | 18     |
| Italy                            | 0.1  | 0.1  | 59     | 35     |



|                                           |      |      |        |        |
|-------------------------------------------|------|------|--------|--------|
| Jamaica                                   | 1.2  | 1.2  | 68     | 46     |
| Jordan                                    | 3.2  | 1.8  | 481    | 381    |
| Japan                                     | 0.3  | 0.2  | 357    | 185    |
| Kazakhstan                                | 8.0  | 2.5  | 1687   | 961    |
| Kenya                                     | 18.2 | 9.1  | 21276  | 13842  |
| Kyrgyzstan                                | 9.1  | 3.4  | 992    | 591    |
| Cambodia                                  | 23.8 | 5.5  | 7405   | 1973   |
| Kiribati                                  | 14.2 | 12.1 | 37     | 34     |
| Saint Kitts and Nevis                     | 0.5  | 0.0  | 1      | 0      |
| Republic of Korea                         | 0.4  | 0.1  | 188    | 39     |
| Kuwait                                    | 0.9  | 1.2  | 42     | 84     |
| Lao People's Democratic Republic          | 26.8 | 15.3 | 4314   | 2646   |
| Lebanon                                   | 2.2  | 0.5  | 132    | 53     |
| Liberia                                   | 23.5 | 13.5 | 2845   | 2040   |
| Libya                                     | 3.1  | 1.3  | 369    | 162    |
| Saint Lucia                               | 0.7  | 0.9  | 2      | 3      |
| Sri Lanka                                 | 1.6  | 0.7  | 550    | 224    |
| Lesotho                                   | 18.4 | 17.9 | 1086   | 1119   |
| Lithuania                                 | 1.1  | 0.3  | 38     | 10     |
| Luxembourg                                | 0.0  | 0.0  | 0      | 0      |
| Latvia                                    | 0.9  | 0.4  | 16     | 7      |
| Morocco                                   | 8.7  | 4.2  | 5299   | 3021   |
| Monaco                                    | 0.0  | 0.1  | 0      | 0      |
| Republic of Moldova                       | 8.3  | 2.7  | 393    | 119    |
| Madagascar                                | 24.8 | 10.8 | 15968  | 8872   |
| Maldives                                  | 7.3  | 0.7  | 45     | 5      |
| Mexico                                    | 5.0  | 2.0  | 12390  | 4809   |
| Marshall Islands                          | 7.4  | 7.1  | 16     | 10     |
| The former Yugoslav Republic of Macedonia | 1.3  | 0.4  | 34     | 9      |
| Mali                                      | 35.1 | 20.0 | 17781  | 14529  |
| Malta                                     | 0.1  | 0.2  | 1      | 1      |
| Myanmar                                   | 15.3 | 9.1  | 17745  | 8380   |
| Montenegro                                | 0.3  | 0.2  | 3      | 1      |
| Mongolia                                  | 12.4 | 3.9  | 594    | 279    |
| Mozambique                                | 21.7 | 14.4 | 17254  | 15323  |
| Mauritania                                | 21.4 | 16.9 | 2162   | 2226   |
| Mauritius                                 | 0.7  | 1.7  | 13     | 24     |
| Malawi                                    | 28.2 | 12.0 | 13366  | 7551   |
| Malaysia                                  | 0.9  | 0.4  | 484    | 219    |
| Namibia                                   | 11.6 | 9.6  | 659    | 720    |
| Niger                                     | 45.1 | 21.9 | 25830  | 20850  |
| Nigeria                                   | 28.8 | 21.3 | 145231 | 148937 |
| Nicaragua                                 | 8.4  | 5.3  | 1140   | 632    |
| Niue                                      | 7.9  | 8.2  | 0      | 0      |
| Netherlands                               | 0.2  | 0.1  | 31     | 19     |
| Norway                                    | 0.2  | 0.1  | 10     | 5      |
| Nepal                                     | 15.7 | 6.1  | 12038  | 3355   |

|                                       |      |      |       |       |
|---------------------------------------|------|------|-------|-------|
| Nauru                                 | 6.8  | 5.5  | 1     | 1     |
| New Zealand                           | 0.5  | 0.5  | 26    | 28    |
| Oman                                  | 1.9  | 1.2  | 102   | 93    |
| Pakistan                              | 21.0 | 14.8 | 93923 | 79726 |
| Panama                                | 2.5  | 2.8  | 185   | 212   |
| Peru                                  | 6.9  | 2.4  | 4231  | 1467  |
| Philippines                           | 8.4  | 5.9  | 19200 | 13910 |
| Palau                                 | 3.0  | 1.6  | 1     | 1     |
| Papua New Guinea                      | 12.3 | 10.1 | 2300  | 2123  |
| Poland                                | 0.5  | 0.3  | 167   | 101   |
| Democratic People's Republic of Korea | 11.9 | 4.2  | 4637  | 1592  |
| Portugal                              | 0.3  | 0.1  | 32    | 8     |
| Paraguay                              | 4.8  | 3.1  | 705   | 419   |
| Qatar                                 | 0.8  | 0.5  | 9     | 14    |
| Romania                               | 8.2  | 3.7  | 2186  | 607   |
| Russian Federation                    | 3.1  | 0.7  | 4632  | 1328  |
| Rwanda                                | 36.0 | 8.3  | 12710 | 2807  |
| Saudi Arabia                          | 2.2  | 1.2  | 1284  | 734   |
| Sudan                                 | 22.7 | 16.8 | 24491 | 21733 |
| Senegal                               | 25.5 | 9.4  | 9729  | 5474  |
| Singapore                             | 0.4  | 0.4  | 16    | 20    |
| Solomon Islands                       | 5.4  | 5.8  | 75    | 97    |
| Sierra Leone                          | 34.1 | 23.6 | 5914  | 5154  |
| El Salvador                           | 6.0  | 2.9  | 835   | 304   |
| San Marino                            | 0.3  | 0.2  | 0     | 0     |
| Somalia                               | 34.9 | 34.9 | 12480 | 15567 |
| Serbia                                | 0.7  | 0.4  | 86    | 34    |
| South Sudan                           | 34.6 | 18.6 | 9754  | 8058  |
| Sao Tome and Principe                 | 13.7 | 7.8  | 72    | 49    |
| Suriname                              | 2.8  | 1.9  | 31    | 19    |
| Slovakia                              | 1.5  | 0.9  | 74    | 51    |
| Slovenia                              | 0.0  | 0.1  | 0     | 2     |
| Sweden                                | 0.1  | 0.2  | 7     | 20    |
| Swaziland                             | 21.0 | 13.5 | 696   | 494   |
| Seychelles                            | 0.9  | 0.9  | 1     | 1     |
| Syrian Arab Republic                  | 3.3  | 1.1  | 1749  | 453   |
| Chad                                  | 38.9 | 34.2 | 15765 | 20707 |
| Togo                                  | 15.2 | 14.7 | 2831  | 3675  |
| Thailand                              | 3.0  | 1.1  | 2651  | 843   |
| Tajikistan                            | 21.1 | 8.9  | 4031  | 2390  |
| Turkmenistan                          | 18.1 | 10.2 | 1621  | 1162  |
| Timor-Leste                           | 24.6 | 11.9 | 972   | 620   |
| Tonga                                 | 2.3  | 2.2  | 6     | 6     |
| Trinidad and Tobago                   | 1.0  | 1.9  | 18    | 37    |
| Tunisia                               | 4.9  | 1.3  | 822   | 272   |
| Turkey                                | 3.2  | 0.7  | 4489  | 1045  |
| Tuvalu                                | 7.6  | 3.9  | 2     | 1     |

|                                    |      |      |       |       |
|------------------------------------|------|------|-------|-------|
| United Republic of Tanzania        | 23.2 | 10.0 | 31096 | 20593 |
| Uganda                             | 20.3 | 10.7 | 22161 | 17041 |
| Ukraine                            | 2.8  | 0.9  | 1111  | 368   |
| Uruguay                            | 1.7  | 0.9  | 92    | 45    |
| United States of America           | 0.3  | 0.3  | 1168  | 1048  |
| Uzbekistan                         | 12.1 | 6.9  | 6539  | 4586  |
| Saint Vincent and the Grenadines   | 0.7  | 1.2  | 2     | 2     |
| Venezuela (Bolivarian Republic of) | 1.8  | 1.8  | 1017  | 1068  |
| Viet Nam                           | 7.3  | 3.3  | 8603  | 5207  |
| Vanuatu                            | 4.4  | 4.3  | 26    | 29    |
| Samoa                              | 2.9  | 2.0  | 15    | 9     |
| Yemen                              | 22.0 | 8.7  | 14202 | 7154  |
| South Africa                       | 12.4 | 9.1  | 14564 | 9248  |
| Zambia                             | 27.6 | 13.2 | 12365 | 8140  |
| Zimbabwe                           | 13.0 | 14.3 | 5108  | 7819  |

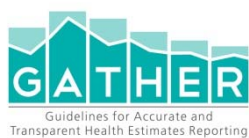

Checklist of information that should be included in new reports of global health estimates

| Item #                                                                                                | Checklist item                                                                                                                                                                                                                                                                                                                                                                            | Reported on page #                                                                                        |
|-------------------------------------------------------------------------------------------------------|-------------------------------------------------------------------------------------------------------------------------------------------------------------------------------------------------------------------------------------------------------------------------------------------------------------------------------------------------------------------------------------------|-----------------------------------------------------------------------------------------------------------|
| <b>Objectives and funding</b>                                                                         |                                                                                                                                                                                                                                                                                                                                                                                           |                                                                                                           |
| 1                                                                                                     | Define the indicator(s), populations (including age, sex, and geographic entities), and time period(s) for which estimates were made.                                                                                                                                                                                                                                                     | 4-5                                                                                                       |
| 2                                                                                                     | List the funding sources for the work.                                                                                                                                                                                                                                                                                                                                                    | 13                                                                                                        |
| <b>Data Inputs</b>                                                                                    |                                                                                                                                                                                                                                                                                                                                                                                           |                                                                                                           |
| <i>For all data inputs from multiple sources that are synthesized as part of the study:</i>           |                                                                                                                                                                                                                                                                                                                                                                                           |                                                                                                           |
| 3                                                                                                     | Describe how the data were identified and how the data were accessed.                                                                                                                                                                                                                                                                                                                     | 4-5, 17                                                                                                   |
| 4                                                                                                     | Specify the inclusion and exclusion criteria. Identify all ad-hoc exclusions.                                                                                                                                                                                                                                                                                                             | 22                                                                                                        |
| 5                                                                                                     | Provide information on all included data sources and their main characteristics. For each data source used, report reference information or contact name/institution, population represented, data collection method, year(s) of data collection, sex and age range, diagnostic criteria or measurement method, and sample size, as relevant.                                             | Supplementary material p 7-16, 57-64, 67-69                                                               |
| 6                                                                                                     | Identify and describe any categories of input data that have potentially important biases (e.g., based on characteristics listed in item 5).                                                                                                                                                                                                                                              | 10-12                                                                                                     |
| <i>For data inputs that contribute to the analysis but were not synthesized as part of the study:</i> |                                                                                                                                                                                                                                                                                                                                                                                           |                                                                                                           |
| 7                                                                                                     | Describe and give sources for any other data inputs.                                                                                                                                                                                                                                                                                                                                      | 5                                                                                                         |
| <i>For all data inputs:</i>                                                                           |                                                                                                                                                                                                                                                                                                                                                                                           |                                                                                                           |
| 8                                                                                                     | Provide all data inputs in a file format from which data can be efficiently extracted (e.g., a spreadsheet rather than a PDF), including all relevant meta-data listed in item 5. For any data inputs that cannot be shared because of ethical or legal reasons, such as third-party ownership, provide a contact name or the name of the institution that retains the right to the data. | We will provide a weblink to Edinburgh Datashare which will be active for public when paper is published. |
| <b>Data analysis</b>                                                                                  |                                                                                                                                                                                                                                                                                                                                                                                           |                                                                                                           |
| 9                                                                                                     | Provide a conceptual overview of the data analysis method. A diagram may be helpful.                                                                                                                                                                                                                                                                                                      | 4-6                                                                                                       |
| 10                                                                                                    | Provide a detailed description of all steps of the analysis, including mathematical formulae. This description should cover, as relevant, data cleaning, data pre-processing, data adjustments and weighting of data sources, and mathematical or statistical model(s).                                                                                                                   | 4-6, Supplementary material p 2-6                                                                         |
| 11                                                                                                    | Describe how candidate models were evaluated and how the final model(s) were selected.                                                                                                                                                                                                                                                                                                    | 4-6                                                                                                       |
| 12                                                                                                    | Provide the results of an evaluation of model performance, if done, as well as the results of any relevant sensitivity analysis.                                                                                                                                                                                                                                                          | 101-105                                                                                                   |
| 13                                                                                                    | Describe methods for calculating uncertainty of the estimates. State which sources of uncertainty were, and were not, accounted for in the uncertainty analysis.                                                                                                                                                                                                                          | 5, 10                                                                                                     |

|                               |                                                                                                                                                          |                                                                                                           |
|-------------------------------|----------------------------------------------------------------------------------------------------------------------------------------------------------|-----------------------------------------------------------------------------------------------------------|
| 14                            | State how analytic or statistical source code used to generate estimates can be accessed.                                                                | Codes are on git hub. We will provide a weblink which will be active for public when paper is published.  |
| <b>Results and Discussion</b> |                                                                                                                                                          |                                                                                                           |
| 15                            | Provide published estimates in a file format from which data can be efficiently extracted.                                                               | We will provide a weblink to Edinburgh Datashare which will be active for public when paper is published. |
| 16                            | Report a quantitative measure of the uncertainty of the estimates (e.g. uncertainty intervals).                                                          | 6-9                                                                                                       |
| 17                            | Interpret results in light of existing evidence. If updating a previous set of estimates, describe the reasons for changes in estimates.                 | 10                                                                                                        |
| 18                            | Discuss limitations of the estimates. Include a discussion of any modelling assumptions or data limitations that affect interpretation of the estimates. | 10-12                                                                                                     |

*This checklist should be used in conjunction with the GATHER statement and Explanation and Elaboration document, found on [gather-statement.org](http://gather-statement.org)*

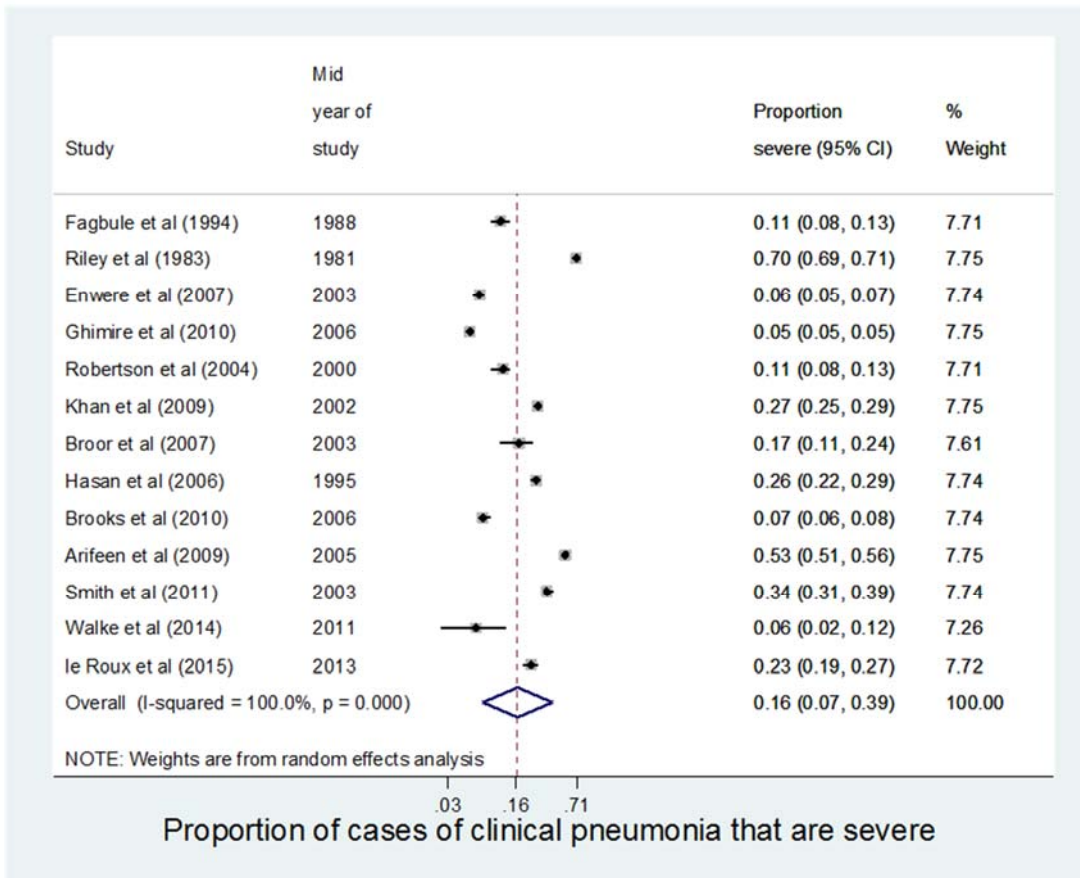

Supplementary figure 1: Studies reporting the proportion of children with clinical pneumonia having severe pneumonia (lower chest wall indrawing)



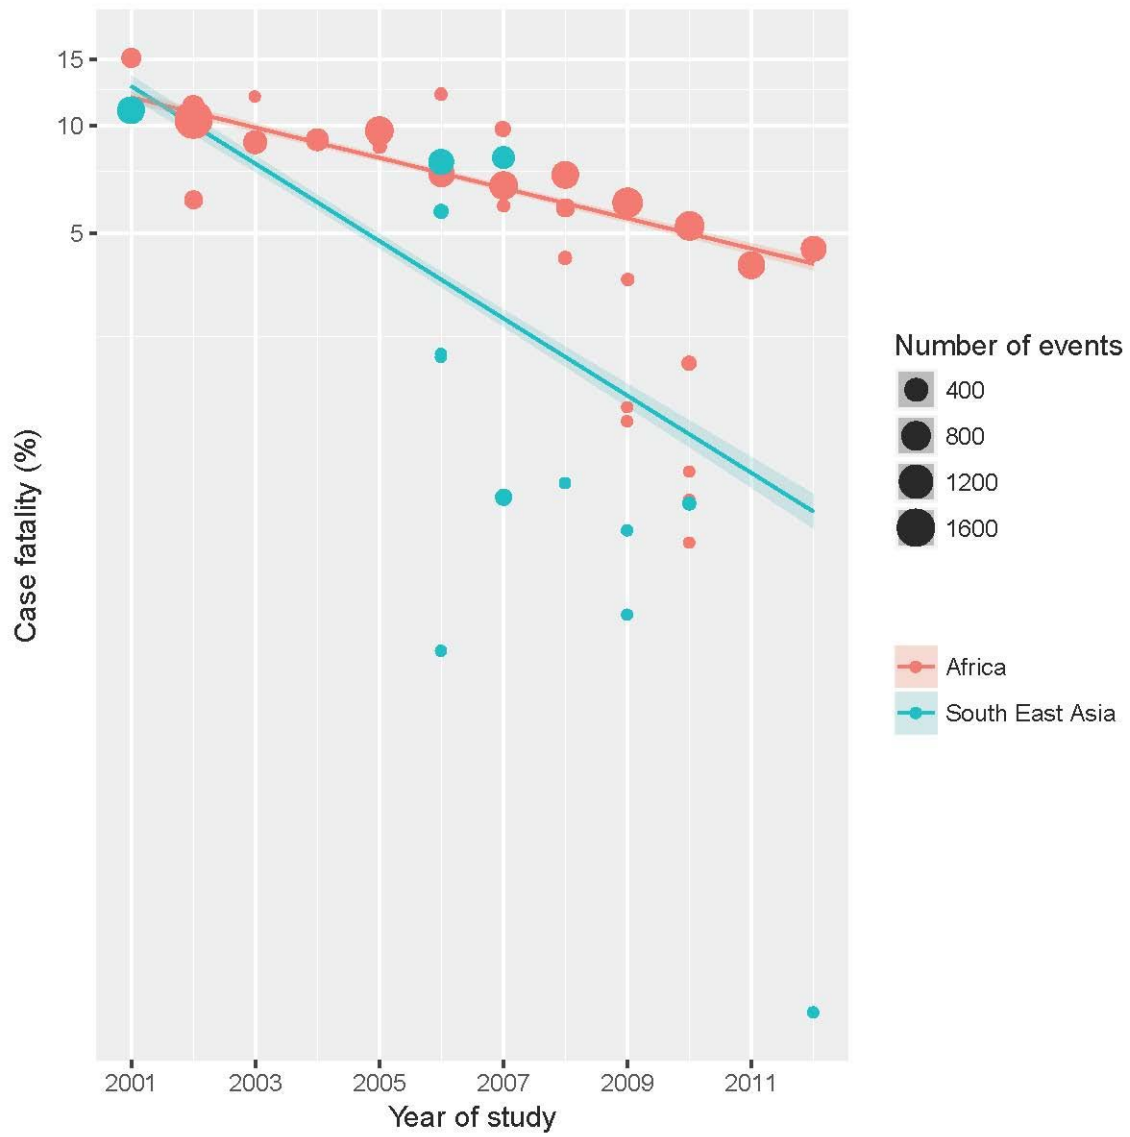

Supplementary figure 3: In-hospital case fatality ratio for child pneumonia in South-east Asia and Africa regions of WHO (2001-2012) on logit scale. The size of circle indicates number of pneumonia cases. The solid lines indicate trend and shaded areas indicate uncertainty range



## References

1. Rothman KJ, Greenland S, Lash TL. Modern epidemiology. 3rd ed. Philadelphia: Lippincott Williams & Wilkins; 2008.
2. Oyejide C, Osinusi K. Acute respiratory tract infection in children in Idikan community, Ibadan, Nigeria: severity, risk factors, and frequency of occurrence. *Review of Infectious Diseases* 1990; **12**(Supplement 8): S1042-S1046.
3. Wafula E, Onyango F, Mirza W, et al. Epidemiology of acute respiratory tract infections among young children in Kenya. *Review of infectious diseases* 1990; **12**(Supplement 8): S1035-S8.
4. Campbell H, Lamont A, O'Neill K, et al. Assessment of clinical criteria for identification of severe acute lower respiratory tract infections in children. *The Lancet* 1989; **333**(8633): 297-9.
5. Afari E, SAKATOKU H, NAKANO T, et al. Acute respiratory infections in children under five in two rural communities in southern Ghana. *Japanese Journal of Tropical Medicine and Hygiene* 1991; **19**(3): 275-80.
6. Fagbule D, Parakoyi D, Spiegel R. Acute respiratory infections in Nigerian children: prospective cohort study of incidence and case management. *Journal of Tropical Pediatrics* 1994; **40**(5): 279-84.
7. Robertson SE, Roca A, Alonso P, et al. Respiratory syncytial virus infection: denominator-based studies in Indonesia, Mozambique, Nigeria and South Africa. *Bulletin of the World Health Organization* 2004; **82**(12): 914-22.
8. Enwere G, Cheung YB, Zaman S, et al. Epidemiology and clinical features of pneumonia according to radiographic findings in Gambian children. *Tropical medicine & international health* 2007; **12**(11): 1377-85.
9. le Roux DM, Myer L, Nicol MP, Zar HJ. Incidence and severity of childhood pneumonia in the first year of life in a South African birth cohort: the Drakenstein Child Health Study. *The Lancet Global Health* 2015; **3**(2): e95-e103.
10. Hortal M, Contera M, Mogdasy C, Russi JC. Acute respiratory infections in children from a deprived urban population from Uruguay. *Revista do Instituto de Medicina Tropical de Sao Paulo* 1994; **36**(1): 51-7.
11. Cruz JR, Pareja G, de Fernandez A, Peralta F, Caceres P, Cano F. Epidemiology of Acute Respiratory Tract Infections Among Guatemalan Ambulatory Preschool Children. *Review of Infectious Diseases* 1990; **12**(Supplement 8): S1029-S34.
12. Borrero I, Fajardo L, Bedoya A, Zea A, Carmona F, de Borrero MF. Acute respiratory tract infections among a birth cohort of children from Cali, Colombia, who were studied through 17 months of age. *Review of Infectious Diseases* 1990; **12**(Supplement 8): S950-S6.
13. Smith KR, McCracken JP, Weber MW, et al. Effect of reduction in household air pollution on childhood pneumonia in Guatemala (RESPIRE): a randomised controlled trial. *The Lancet* 2011; **378**(9804): 1717-26.
14. Lanata CF. Incidence and evolution of pneumonia in children at the community level. *Respiratory infections in children Benguigui Y, Lopez Antuñano FJ, Schmunis G, Yunes J, eds Washington, DC: Pan American Health Organization* 1999: 59-83.
15. Khan AJ, Hussain H, Omer SB, et al. High incidence of childhood pneumonia at high altitudes in Pakistan: a longitudinal cohort study. *Bulletin of the World Health Organization* 2009; **87**(3): 193-9.
16. Ashraf S, Huque MH, Kenah E, Agboatwalla M, Luby SP. Effect of recent diarrhoeal episodes on risk of pneumonia in children under the age of 5 years in Karachi, Pakistan. *International journal of epidemiology* 2013; **42**(1): 194-200.
17. Datta N, Kumar V, Kumar L, Singhi S. Application of case management to the control of acute respiratory infections in low-birth-weight infants: a feasibility study. *Bulletin of the World Health Organization* 1987; **65**(1): 77.
18. Pandey MR, Sharma PR, Gubhaju BB, et al. Impact of a pilot acute respiratory infection (ARI) control programme in a rural community of the hill region of Nepal. *Annals of tropical paediatrics* 1989; **9**(4): 212-20.
19. Vathanophas K, Sangchai R, Raktham S, et al. A community-based study of acute respiratory tract infection in Thai children. *Review of Infectious Diseases* 1990; **12**(Supplement 8): S957-S65.
20. Reddaiah V, Kapoor SK. Acute respiratory infections in rural underfives. *Indian journal of pediatrics* 1988; **55**(3): 424-6.
21. Pandey MR, Daulaire N, Starbuck E, Houston R, McPherson K. Reduction in total under-five mortality in western Nepal through community-based antimicrobial treatment of pneumonia. *The Lancet* 1991; **338**(8773): 993-7.
22. Zaman K, Baqui A, Sack R, Bateman O, Chowdhury H, Black R. Acute respiratory infections in children: a community-based longitudinal study in rural Bangladesh. *Journal of Tropical Pediatrics* 1997; **43**(3): 133-7.
23. Singh M, Nayar S. Magnitude of acute respiratory infections in under five children. *The Journal of communicable diseases* 1996; **28**(4): 273-8.
24. Hasan K, Jolly P, Marquis G, et al. Viral etiology of pneumonia in a cohort of newborns till 24 months of age in Rural Mirzapur, Bangladesh. *Scandinavian journal of infectious diseases* 2006; **38**(8): 690-5.
25. Broor S, Parveen S, Bharaj P, et al. A prospective three-year cohort study of the epidemiology and virology of acute respiratory infections of children in rural India. *PloS one* 2007; **2**(6): e491.
26. Brooks WA, Goswami D, Rahman M, et al. Influenza is a major contributor to childhood pneumonia in a tropical developing country. *The Pediatric infectious disease journal* 2010; **29**(3): 216-21.
27. Arifeen SE, Saha SK, Rahman S, et al. Invasive pneumococcal disease among children in rural Bangladesh: results from a population-based surveillance. *Clinical Infectious Diseases* 2009; **48**(Supplement 2): S103-S13.
28. Walke SP, Das R, Acharya AS, Pemde HK. Incidence, pattern, and severity of acute respiratory infections among infants and toddlers of a peri-urban area of Delhi: A 12-month prospective study. *International Scholarly Research Notices* 2014; **2014**.

29. Lehmann D. Tari Research Unit: Final Report for the Southern Highlands Rural Development Project: Southern Highlands Rural Development Project; 1984.
30. Zhang Z, Gao L, Wang Z, Cao Y, Wu G, Zhu Z. Acute respiratory infections in Beijing children. Epidemiological studies at Dongguan Brigade. *Chin Med J (Engl)* 1986; 561-8.
31. Tupasi TE, de Leon LE, Lupisan S, et al. Patterns of acute respiratory tract infection in children: a longitudinal study in a depressed community in Metro Manila. *Review of Infectious Diseases* 1990; **12**(Supplement 8): S940-S9.
32. Smith TA, Lehmann D, Coakley C, Spooner V, Alpers MP. Relationships between growth and acute lower-respiratory infections in children aged less than 5 y in a highland population of Papua New Guinea. *The American journal of clinical nutrition* 1991; **53**(4): 963-70.
33. Hu YC, Lv WY. Analysis of childhood acute respiratory infection. *Shanghai Preventive Medicine* 1996; **8**(2).
34. Sun YF, Fang XQ, He HX, Zhu QZ, Wang Q, Chen HY. Analysis of surveillance results of acute respiratory infection in children aged 0-4 years. *Maternal And Child Health Care Of China* 1992; (05): 42-5+64.
35. Zhou P, Gu MF. Surveillance of childhood acute respiratory infection in 0-4 years. *Chinese Primary Health Care* 1994; (10): 30-1.
36. Mo JZ. Surveillance of 20867 children aged 0-4 years with ARI from rural areas in South of Jiangsu. *Chinese Primary Health Care* 1998; **12**(4).
37. Xie SM, Cheng L, Hou YJ, Cao SY, Yu Q. 3097 cases of acute respiratory infection in childhood aged 0-4 years. *Chongqing Medicine* 1993; **22**(6).
38. Lou LY, Cong GQ, Sun SX, Song YH, Li GL, Yang S. Analysis of characteristics of acute respiratory infection in children younger than 15 years old in rural areas in Heilongjiang Province. *Chinese Primary Health Care* 1995; **9**(2).
39. Zhou YY, Li ZH, Chen M, Huang GH. Seasonality analysis of pneumonia incidence in children younger than 5 years old from Guangzhou. *Chinese Journal Of Child Health Care* 2000; **8**(1): 35-6.
40. Cheng P. Decreasing childhood mortality from pneumonia via applying appropriate ARI management methods. *Jian Su Journal Of Preventive Medicine* 1996; **2**.
41. Chen W, Zhao MR, Zhao YY, Ma BJ. Analysis of acute respiratory infection in children from rural areas in Henan Province. *Chinese Rural Health* 1997; **25**(1).
42. Huang WH, Chen LN, Shi YB. Situation of acute respiratory infection in children less than 5 years in Licheng District. *Strait Journal Of Preventive Medicine* 1999; (02): 21.
43. Xu GL, Zheng JY, Li LX, Wei YH, Cai ZL. Surveillance of acute respiratory infection in under five children from Huaning County in Yunnan Province. *Chinese Primary Health Care* 2000; **14**(6): 36-7.
44. Xie YL. Research of under five childhood mortality due to pneumonia from Hubei Province. *Hubei Journal of Preventive Medicine* 2003; **14**(4): 17-9.
45. Gao JY, Feng B, Li L. Research of establishing surveillance system to monitor childhood respiratory disease to decrease the mortality from pneumonia. *Maternal And Child Health Care Of China* 2004; **19**(16): 13-4.
46. Krishnan A, Amarchand R, Gupta V, et al. Epidemiology of acute respiratory infections in children - preliminary results of a cohort in a rural north Indian community. *BMC Infectious Diseases* 2015; **15** (1) (no pagination)(462).
47. Nair H, Simões EAF, Rudan I, et al. Global and regional burden of hospital admissions for severe acute lower respiratory infections in young children in 2010: a systematic analysis. *Lancet* 2013; **381**: 1380-90.
48. Mulholland K, Hilton S, Adegbola R, et al. Randomised trial of Haemophilus influenzae type-b tetanus protein conjugate vaccine [corrected] for prevention of pneumonia and meningitis in Gambian infants.[Erratum appears in Lancet 1997 Aug 16;350(9076):524]. *Lancet* 1997; **349**(9060): 1191-7.
49. Madhi SA, Kuwanda L, Cutland C, Klugman KP. The impact of a 9-valent pneumococcal conjugate vaccine on the public health burden of pneumonia in HIV-infected and -uninfected children. *Clin Infect Dis* 2005; **40**(10): 1511-8.
50. Campbell JD, Sow SO, Levine MM, Kotloff KL. The causes of hospital admission and death among children in Bamako, Mali. *J Trop Pediatr* 2004; **50**(3): 158-63.
51. Tornheim JA, Many AS, Oyando N, Kabaka S, Breiman RF, Feikin DR. The epidemiology of hospitalized pneumonia in rural Kenya: the potential of surveillance data in setting public health priorities. *Int J Infect Dis* 2007; **11**(6): 536-43.
52. Lowther SA, Shay DK, Holman RC, Clarke MJ, Kaufman SF, Anderson LJ. Bronchiolitis-associated hospitalizations among American Indian and Alaska Native children. *Pediatr Infect Dis J* 2000; **19**(1): 11-7.
53. Carroll KN, Gebretsadik T, Griffin MR, et al. Increasing burden and risk factors for bronchiolitis-related medical visits in infants enrolled in a state health care insurance plan. *Pediatrics* 2008; **122**(1): 58-64.
54. Grijalva CG, Nuorti JP, Zhu Y, Griffin MR. Increasing incidence of empyema complicating childhood community-acquired pneumonia in the United States. *Clin Infect Dis* 2010; **50**(6): 805-13.
55. Henrickson KJ, Hoover S, Kehl KS, Hua W. National disease burden of respiratory viruses detected in children by polymerase chain reaction. *Pediatr Infect Dis J* 2004; **23**(1 Suppl): S11-8.
56. Lee GE, Lorch SA, Sheffler-Collins S, Kronman MP, Shah SS. National hospitalization trends for pediatric pneumonia and associated complications. *Pediatrics* 2010; **126**(2): 204-13.
57. Peck AJ, Holman RC, Curns AT, et al. Lower respiratory tract infections among American Indian and Alaska Native children and the general population of U.S. Children. *Pediatr Infect Dis J* 2005; **24**(4): 342-51.
58. Weinberg GA, Hall CB, Iwane MK, et al. Parainfluenza virus infection of young children: estimates of the population-based burden of hospitalization. *J Pediatr* 2009; **154**(5): 694-9.

59. Yorita KL, Holman RC, Sejvar JJ, Steiner CA, Schonberger LB. Infectious disease hospitalizations among infants in the United States. *Pediatrics* 2008; **121**(2): 244-52.
60. Nizami SQ, Bhutta ZA, Hasan R. Incidence of acute respiratory infections in children 2 months to 5 years of age in periurban communities in Karachi, Pakistan. *JPMA J Pak Med Assoc* 2006; **56**(4): 163-7.
61. Owais A, Tikmani SS, Sultana S, et al. Incidence of pneumonia, bacteremia, and invasive pneumococcal disease in Pakistani children. *Trop Med Int Health* 2010; **15**(9): 1029-36.
62. Roxburgh CSD, Youngson GG, Townend JA, Turner SW. Trends in pneumonia and empyema in Scottish children in the past 25 years. *Arch Dis Child* 2008; **93**(4): 316-8.
63. Jokinen C, Heiskanen L, Juvonen H, et al. Incidence of community-acquired pneumonia in the population of four municipalities in eastern Finland. *Am J Epidemiol* 1993; **137**(9): 977-88.
64. Monge V, Gonzalez A. Hospital admissions for pneumonia in Spain. *Infection* 2001; **29**(1): 3-6.
65. Gil A, San-Martin M, Carrasco P, Gonzalez A. Epidemiology of pneumonia hospitalizations in Spain, 1995-1998. *J Infect* 2002; **44**(2): 84-7.
66. Garcés-Sánchez MD, Díez-Domingo J, Ballester Sanz A, et al. Epidemiology of community-acquired pneumonia in children aged less than 5 years old in the Autonomous Community of Valencia (Spain). *An Pediatr (Barc)* 2005; **63**(2): 125-30.
67. Comes Castellano AM, Lluch Rodrigo JA, Portero Alonso A, Pastor Villalba E, Sanz Valero M. Development of the incidence of pneumonia in the autonomous community of Valencia throughout the 1995-2001 period. A retrospective study. *Anales de Medicina Interna* 2005; **22**(3): 118-23.
68. Vicente D, Montes M, Cilla G, Perez-Yarza EG, Perez-Trallero E. Hospitalization for respiratory syncytial virus in the paediatric population in Spain. *Epidemiol Infect* 2003; **131**(2): 867-72.
69. Weigl JAI, Puppe W, Belke O, Neussus J, Bagci F, Schmitt HJ. The descriptive epidemiology of severe lower respiratory tract infections in children in Kiel, Germany. *Klin Padiatr* 2005; **217**(5): 259-67.
70. van Gageldonk-Lafeber AB, Bogaerts MAH, Verheij RA, van der Sande MAB. Time trends in primary-care morbidity, hospitalization and mortality due to pneumonia. *Epidemiol Infect* 2009; **137**(10): 1472-8.
71. Forster J, Ihorst G, Rieger CHL, et al. Prospective population-based study of viral lower respiratory tract infections in children under 3 years of age (the PRI.DE study). *Eur J Pediatr* 2004; **163**(12): 709-16.
72. Ansaldi F, Sticchi L, Durando P, et al. Decline in pneumonia and acute otitis media after the introduction of childhood pneumococcal vaccination in Liguria, Italy. [Erratum appears in *J Int Med Res*. 2009 Mar-Apr;37(2):594]. *J Int Med Res* 2008; **36**(6): 1255-60.
73. Cilla G, Onate E, Perez-Yarza EG, Montes M, Vicente D, Perez-Trallero E. Hospitalization rates for human metapneumovirus infection among 0- to 3-year-olds in Gipuzkoa (Basque Country), Spain. *Epidemiol Infect* 2009; **137**(1): 66-72.
74. Che D, Caillere N, Brosset P, Vallejo C, Jossesan L. Burden of infant bronchiolitis: data from a hospital network. *Epidemiol Infect* 2010; **138**(4): 573-5.
75. Zaman K, Baqui AH, Yunus M, et al. Acute respiratory infections in children: a community-based longitudinal study in rural Bangladesh. *J Trop Pediatr* 1997; **43**(3): 133-7.
76. Brooks WA, Santosham M, Naheed A, et al. Effect of weekly zinc supplements on incidence of pneumonia and diarrhoea in children younger than 2 years in an urban, low-income population in Bangladesh: randomised controlled trial. *Lancet* 2005; **366**(9490): 999-1004.
77. Baqui AH, Rahman M, Zaman K, et al. A population-based study of hospital admission incidence rate and bacterial aetiology of acute lower respiratory infections in children aged less than five years in Bangladesh. *J Health Popul Nutr* 2007; **25**(2): 179-88.
78. Chandyo RK, Shrestha PS, Valentiner-Branth P, et al. Two weeks of zinc administration to Nepalese children with pneumonia does not reduce the incidence of pneumonia or diarrhea during the next six months. *J Nutr* 2010; **140**(9): 1677-82.
79. Shah AS, Knoll MD, Sharma PR, et al. Invasive pneumococcal disease in Kanti Children's Hospital, Nepal, as observed by the South Asian Pneumococcal Alliance network. *Clin Infect Dis* 2009; **48** (Suppl 2): S123-8.
80. Hasan R, Rhodes J, Thamthitawat S, et al. Incidence and etiology of acute lower respiratory tract infections in hospitalized children younger than 5 years in rural Thailand. *Pediatr Infect Dis J* 2014; **33**(2): e45-e52.
81. Williams EJ, Thorson S, Maskey M, et al. Hospital-based surveillance of invasive pneumococcal disease among young children in urban Nepal. *Clin Infect Dis* 2009; **48** (Suppl 2): S114-22.
82. Shah AS, Nisarga R, Ravi Kumar KL, Hubler R, Herrera G, Kilgore PE. Establishment of population-based surveillance for invasive pneumococcal disease in Bangalore, India. *Indian J Med Sci* 2009; **63**(11): 498-507.
83. Tupasi TE, de Leon LE, Lupisan S, et al. Patterns of acute respiratory tract infection in children: a longitudinal study in a depressed community in Metro Manila. *Rev Infect Dis* 1990; **12** (Suppl 8): S940-9.
84. Williams P, Gracey M, Smith P. Hospitalization of aboriginal and non-aboriginal patients for respiratory tract diseases in Western Australia, 1988-1993. *Int J Epidemiol* 1997; **26**(4): 797-805.
85. Sun YF, Fang XQ, He HX, Zhu QZ, Wang Q, Chen HY. Analysis of acute respiratory infections surveillance in children aged 0-4 years old (0-4岁儿童急性呼吸道感染监测结果分析). *Chinese Maternal and Child Health (中国妇幼保健)* 1992; **7**(5).
86. Hu YC, Lu WY. Effect of acute respiratory infections management in children (小儿急性呼吸道感染管理效果分析). *Shanghai Journal of Preventive Medicine (上海预防医学杂志)* 1996; **8**(2).

87. Wang L, Dong SP, Zhao GZ, Li JS. Promoting standard case management of acute respiratory infections to reduce mortality in children aged 0-4 years old (推广儿童急性呼吸道感染标准病例管理降低0-4岁儿童死亡率). *Chinese Journal of Primary Health Care (中国初级卫生保健)* 1997; **11**(3).
88. Liu Q, Fu P, Zhao S, Zou SH. Analysis of acute respiratory infections surveillance in children aged 0-4 years old in Qingdao (青岛市0-4岁儿童急性呼吸道感染监测结果分析). *Acta Academiae Medicinae Qingdao (青岛医学院学报)* 1994; **30**(3).
89. Xie SM, Chen L, Hou YJ, Zhen SY, Yu Q. Analysis of acute respiratory infections surveillance in 3097 children aged 0-4 years old (0-4岁小儿急性呼吸道感染监测3097例分析). *Chongqing Medical Journal 重庆医学* 1993; **22**(6).
90. Lou LY, Cong GQ, Sun SX, Song YH, Li GL, Yang S. Analysis of acute respiratory infections surveillance in children under 5 years in rural Heilongjiang (黑龙江省农村5岁以下儿童急性呼吸道感染监测分析). *Chinese Journal of Primary Health Care (中国初级卫生保健)* 1995; **9**(2).
91. Grant CC, Scragg R, Tan D, Pati A, Aickin R, Yee RL. Hospitalization for pneumonia in children in Auckland, New Zealand. *J Paediatr Child Health* 1998; **34**(4): 355-9.
92. Chi XX, Chen X, Ouyang Y, Xue XL. Preliminary analysis of acute respiratory infections surveillance in children under 5 years in Fujian (福建省ARI项目县5岁以下儿童监测结果初步分析). *Strait Journal of Preventive Medicine (海峡预防医学杂志)* 1996; **2**(3).
93. Chen W, Zhao MR, Zhao YY, Ma BJ. Analysis of acute respiratory infections surveillance in children in rural Henan (河南农村婴幼儿急性呼吸道感染监测结果分析). *Chinese Journal of Rural Medicine (中国农村医学)* 1997; **25**(4).
94. Chen P. Effect of acute respiratory infections management to reduce mortality in children with pneumonia (运用ARI管理适宜技术降低婴幼儿肺炎死亡率). *Jiangsu Journal of Preventive Medicine (江苏预防医学)* 1996; **2**.
95. Mo JZ. Analysis of acute respiratory infections surveillance in 20867 children aged 0-4 years old in Southern Jiangsu (苏南农村20867名0-4岁儿童ARI监测研究). *Chinese Journal of Primary Health Care (中国初级卫生保健)* 1998; **12**(4).
96. Huang WH, Chen LN, Shi LB. Analysis of acute respiratory infections surveillance in children aged 0-4 years old in Licheng (鲤城区0-4岁儿童急性呼吸道感染监测结果分析). *Strait Journal of Preventive Medicine (海峡预防医学杂志)* 1999; **5**(2).
97. Xu GL, Zheng JY, Li LX, Wei YH, Cai ZL. Analysis of acute respiratory infections monitoring in children under 5 years in Huaning, Yunnan (云南省华宁县5岁以下儿童急性呼吸道感染监测分析). *Maternal and Child Health (妇幼保健)* 2000; **14**(6).
98. Gao JY, Feng B, Li L. Establishing respiratory monitoring network to reduce pneumonia mortality in children (建立儿童呼吸监测网控制肺炎降低肺炎死亡率的研究). *Chinese Journal of Maternal and Child Health (中国妇幼保健)* 2004; **19**(8).
99. Qu JS, Li L, Wang GY. The influence of acute respiratory infection administration on mortality of pneumonia in children under five years old (急性呼吸道感染管理对5岁以下儿童肺炎死亡率的影响). *Qilu Journal of Medicine (齐鲁医学杂志)* 2009; **24**(1).
100. Moore HC, de Klerk N, Richmond P, Lehmann D. A retrospective population-based cohort study identifying target areas for prevention of acute lower respiratory infections in children. *BMC Public Health* 2010; **10**: 757.
101. Russell FM, Fakakovi T, Paasi S, Ika A, Mulholland EK. Reduction of meningitis and impact on under-5 pneumonia after introducing the Hib vaccine in the Kingdom of Tonga. *Ann Trop Paediatr* 2009; **29**(2): 111-7.
102. Ho P-L, Chiu SS, Chow FKH, Mak GC, Lau YL. Pediatric hospitalization for pneumococcal diseases preventable by 7-valent pneumococcal conjugate vaccine in Hong Kong. *Vaccine* 2007; **25**(39-40): 6837-41.
103. Magree HC, Russell FM, Sa'aga R, et al. Chest X-ray-confirmed pneumonia in children in Fiji. *Bull World Health Organ* 2005; **83**(6): 427-33.
104. Anh DD, Kilgore PE, Slack MP, et al. Surveillance of pneumococcal-associated disease among hospitalized children in Khanh Hoa Province, Vietnam. *Clin Infect Dis* 2009; **48** (Suppl 2): S57-64.
105. Yoshida LM, Suzuki M, Yamamoto T, et al. Viral pathogens associated with acute respiratory infections in central vietnamese children. *Pediatr Infect Dis J* 2010; **29**(1): 75-7.
106. Kosai H, Tamaki R, Saito M, et al. Incidence and Risk Factors of Childhood Pneumonia-Like Episodes in Biliran Island, Philippines--A Community-Based Study. *PLoS ONE [Electronic Resource]* 2015; **10**(5): e0125009.
107. Onyango CO, Njeru R, Kazungu S, et al. Influenza Surveillance Among Children With Pneumonia Admitted to a District Hospital in Coastal Kenya, 2007-2010. *J Infect Dis* 2012; **206**: S61-S7.
108. Strachan RE, Snelling TL, Jaffe A. Increased paediatric hospitalizations for empyema in Australia after introduction of the 7-valent pneumococcal conjugate vaccine. *Bull World Health Organ* 2013; **91**(3): 167-73.
109. Greenbaum AH, Chen J, Reed C, et al. Hospitalizations for severe lower respiratory tract infections. *Pediatrics* 2014; **134**(3): 546-54.
110. Nisarga R, Premalatha R, Shivananda, et al. Hospital-based surveillance of invasive pneumococcal disease and pneumonia in South Bangalore, India. *Indian Pediatrics* 2015; **52**(3): 205-11.
111. Poling J, Kelly L, Chan C, Fisman D, Ulanova M. Hospital admission for community-acquired pneumonia in a First Nations population. *Can J Rural Med* 2014; **19**(4): 135-41.
112. Capeding MR, Bravo L, Santos J, et al. Prospective Surveillance Study of Invasive Pneumococcal Disease Among Urban Children in the Philippines. *Pediatr Infect Dis J* 2013; **32**(10): E383-E9.

113. Ayieko P, Okiro EA, Edwards T, Nyamai R, English M. Variations in mortality in children admitted with pneumonia to Kenyan hospitals. *PLoS One* 2012; **7**(11): e47622.
114. Moore HC, Lehmann D, de Klerk N, Jacoby P, Richmond PC. Reduction in disparity for pneumonia hospitalisations between Australian indigenous and non-Indigenous children. *J Epidemiol Commun H* 2012; **66**(6): 489-94.
115. Ngoy BB, Zachariah R, Hinderaker SG, et al. Paediatric in-patient care in a conflict-torn region of Somalia: are hospital outcomes of acceptable quality? *Public Health Action* 2013; **3**(2): 125-7.
116. Ramachandran P, Nedunchelian K, Vengatesan A, Suresh S. Risk factors for mortality in community-acquired pneumonia among children aged 1-59 months admitted in a referral hospital. *Indian Pediatrics* 2012; **49**(11): 889-95.
117. Ramakrishna B, Graham SM, Phiri A, Mankhambo L, Duke T. Lactate as a predictor of mortality in Malawian children with WHO-defined pneumonia. *Archives of Disease in Childhood* 2012; **97**(4): 336-U.
118. Webb C, Ngama M, Ngatia A, et al. Treatment Failure Among Kenyan Children With Severe Pneumonia-A Cohort Study. *Pediatr Infect Dis J* 2012; **31**(9): E152-E7.
119. Lazzarini M, Seward N, Lufesi N, et al. Mortality and its risk factors in Malawian children admitted to hospital with clinical pneumonia, 2001-12: a retrospective observational study. *Lancet Global Health* 2016; **4**(1): e57-e68.
120. Bonsignori F, Chiappini E, Orlandini E, et al. Hospitalization rates of complicated pneumococcal community-acquired pneumonia is increasing in Tuscan children. *Int J Immunopathol Pharmacol* 2013; **26**(4): 995-1005.
121. Wysocki J, Sluzewski W, Gutterman E, Jouve S, Moscariello M, Balter I. Active hospital-based surveillance of invasive pneumococcal disease and clinical pneumonia in infants and young children in two Polish counties. *Archives of Medical Science* 2016; **12**(3): 629-38.
122. Enarson PM, Gie RP, Mwansambo CC, et al. Potentially modifiable factors associated with death of infants and children with severe pneumonia routinely managed in district hospitals in Malawi. *PLoS ONE* 2015; **10** (8) (no pagination)(e0133365).
123. Lanaspa M, O'Callaghan-Gordo C, Machevo S, et al. High prevalence of *Pneumocystis jirovecii* pneumonia among Mozambican children <5 years of age admitted to hospital with clinical severe pneumonia. *Clinical Microbiology & Infection* 2015; **21**(11): 1018.e9-.e15.
124. Saha S, Hasan M, Kim L, et al. Epidemiology and risk factors for pneumonia severity and mortality in Bangladeshi children <5 years of age before 10-valent pneumococcal conjugate vaccine introduction. *BMC Public Health* 2016; **16**(1): 1233.
